# Supplementary material for: Remote stereocontrol in reactions between 4- and 5-alkoxyalk-2-enylstannanes and 1-alkoxycarbonylimines and analogues: stereoselective approaches to novel α-amino acids
Source: Royal Society of Chemistry journal article supplement (doi:10.1039/c2ob25097g), 2012-01-01

D. Halliwell  
D0H1/91  
cdcl3  
536

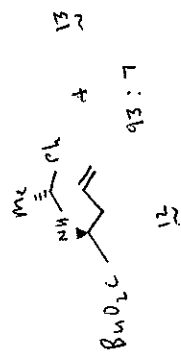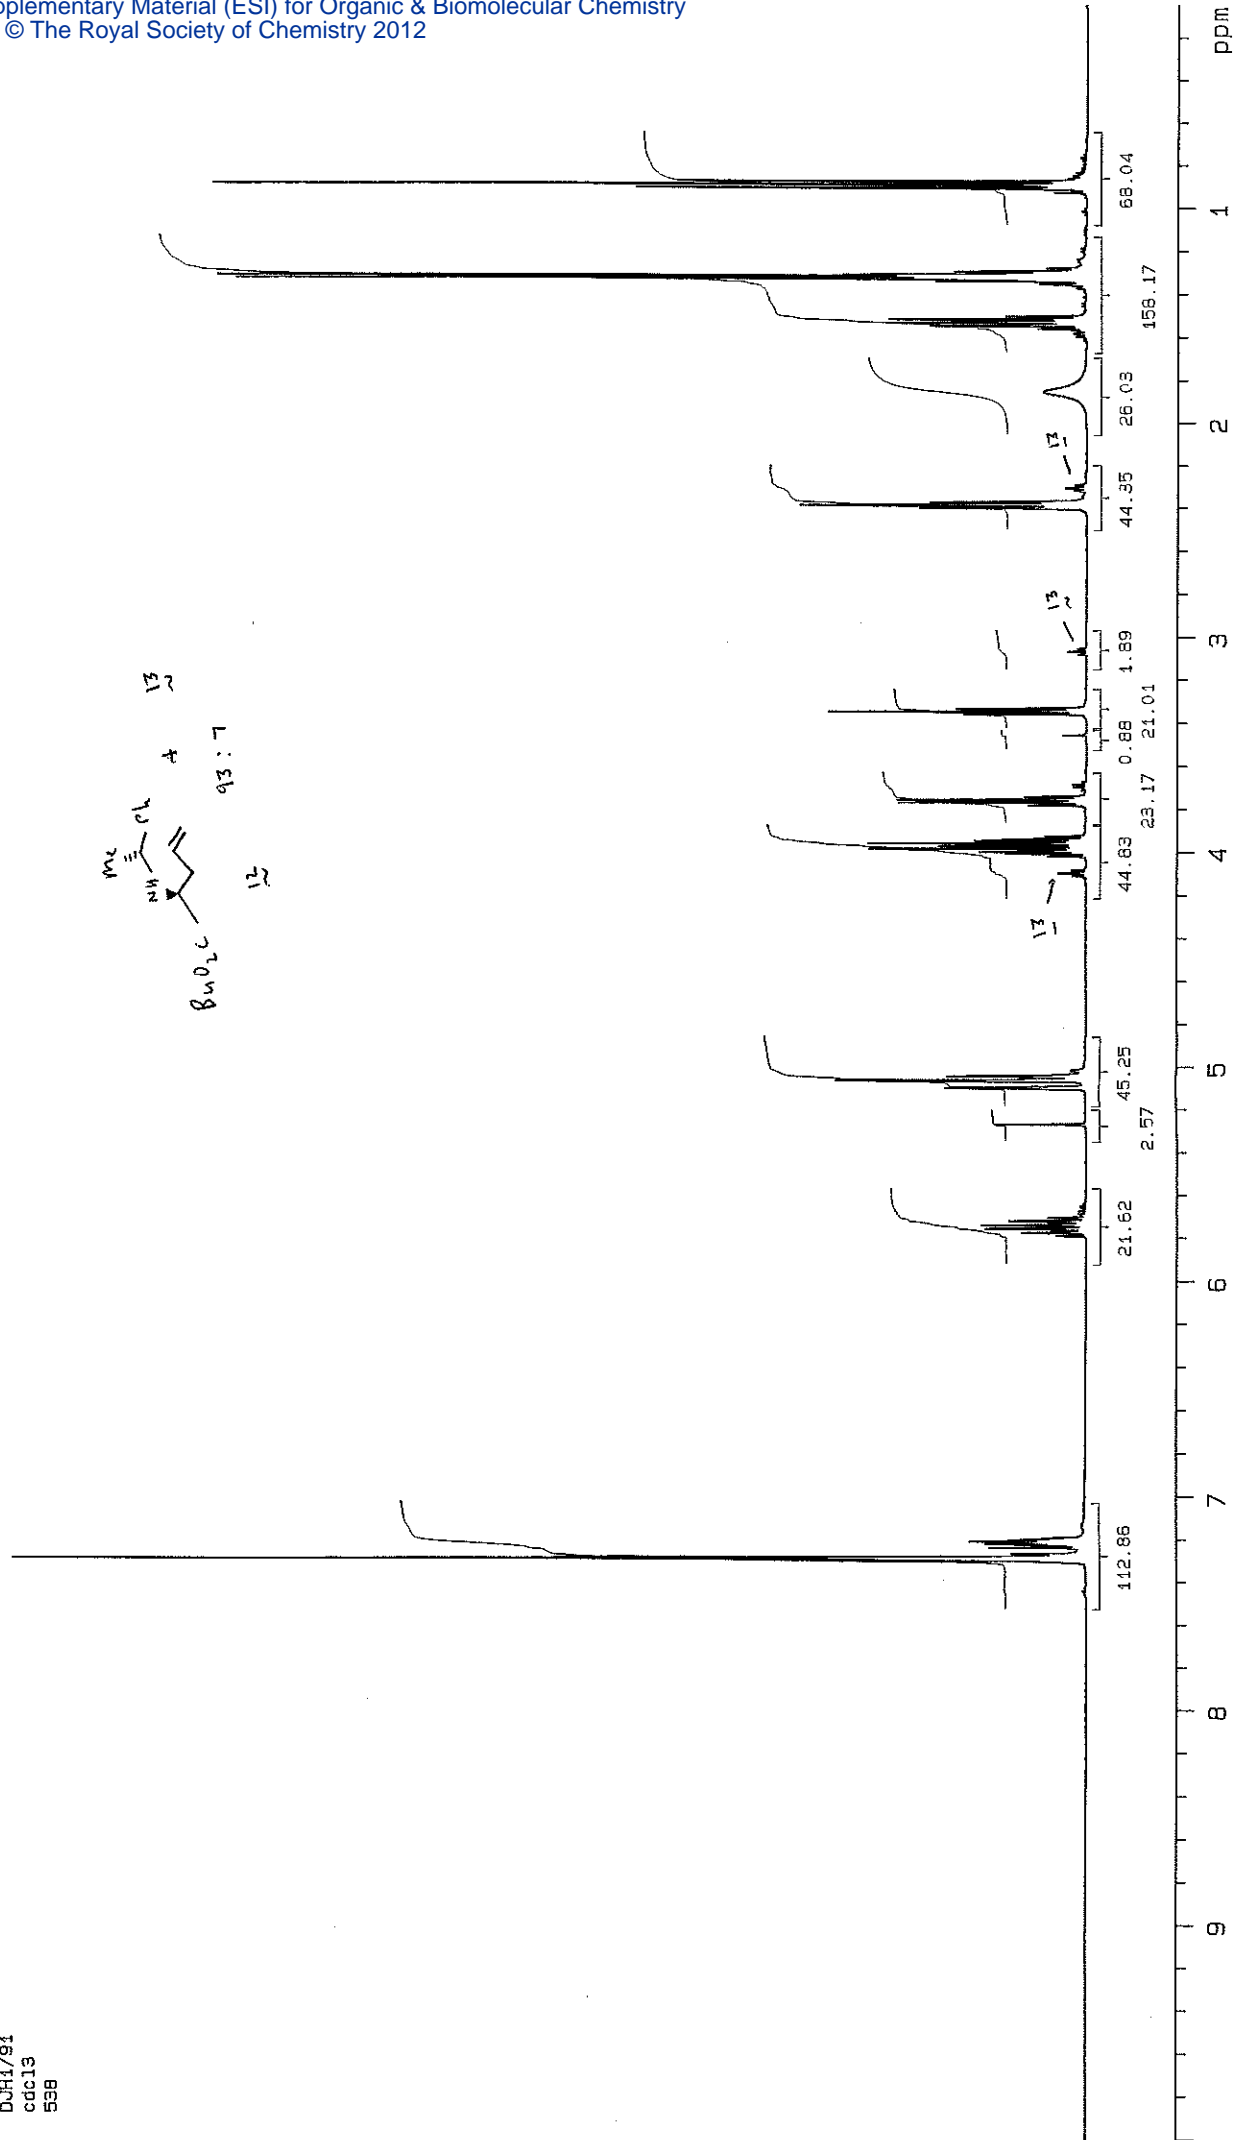

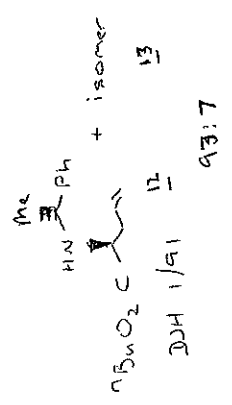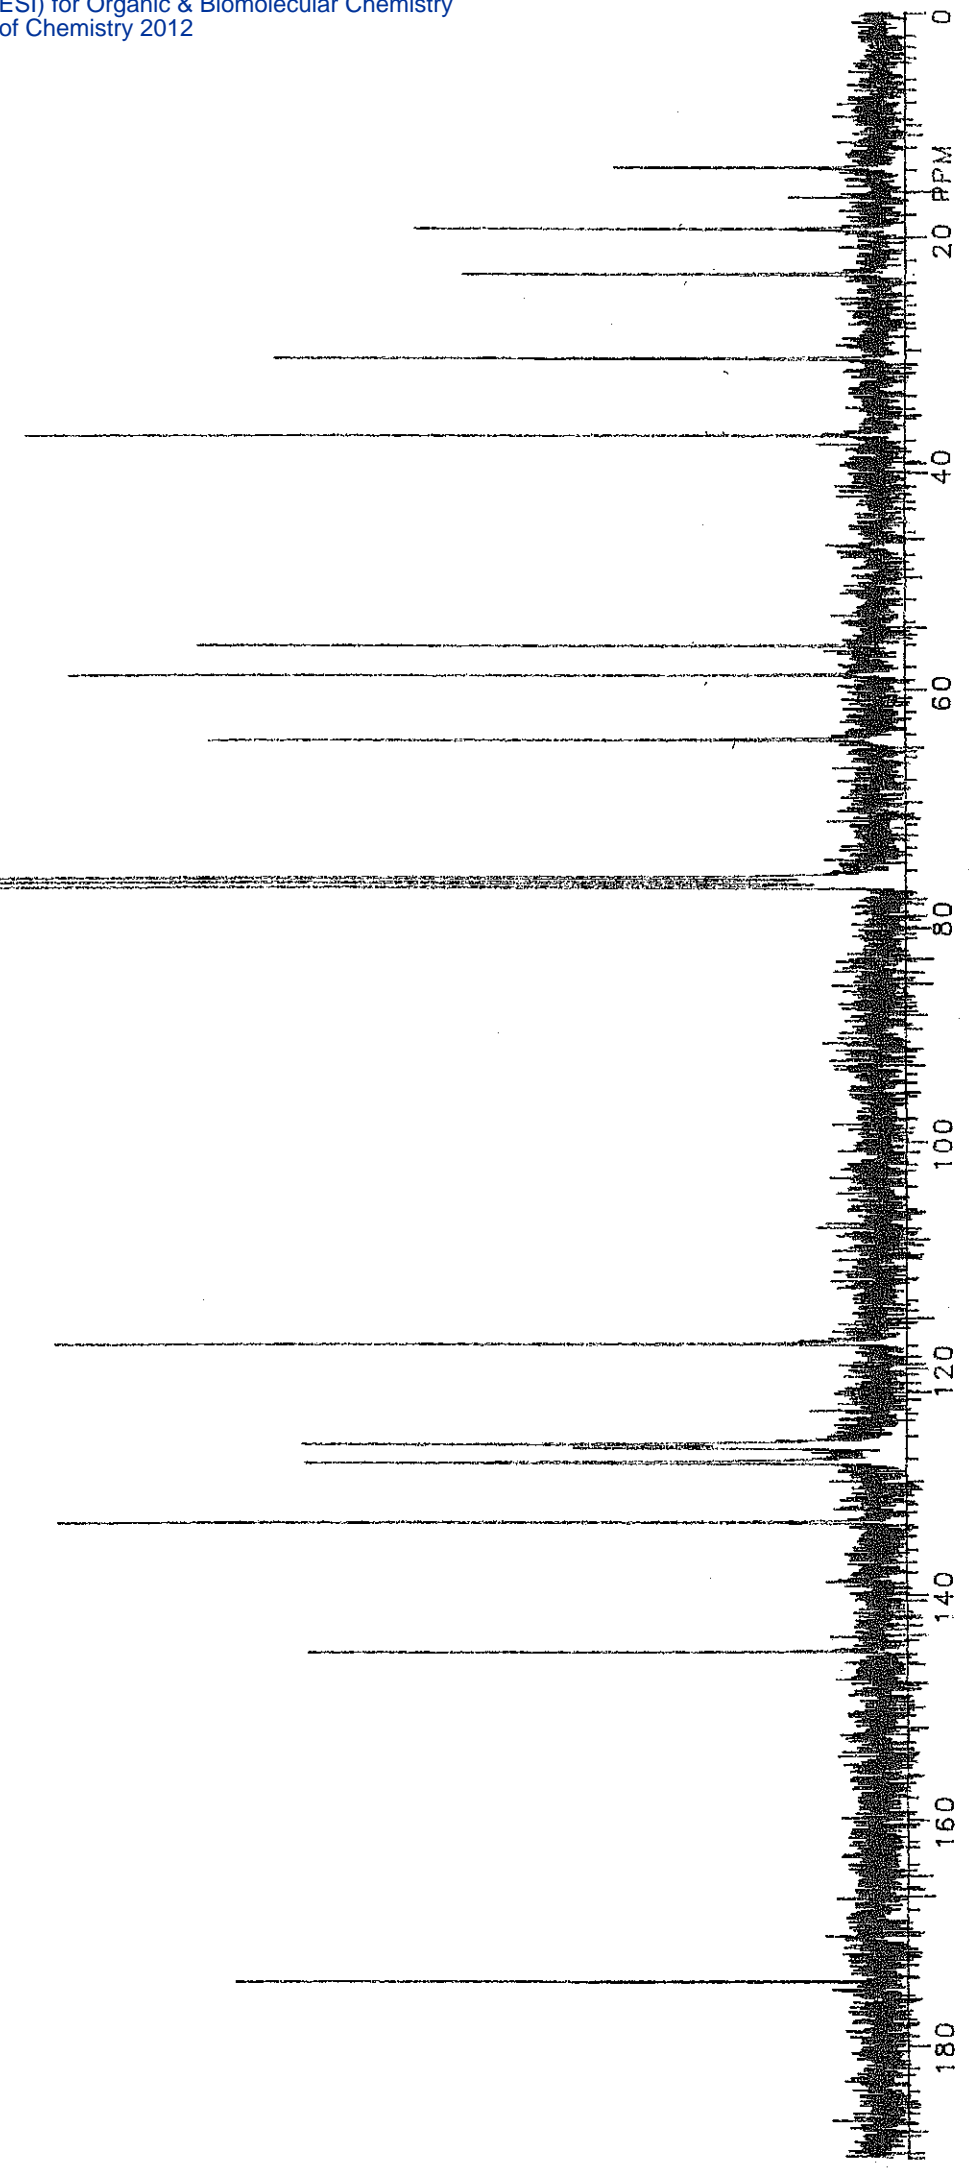

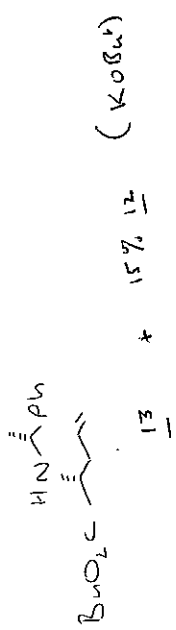

D. Hallett  
DJH SYNAMINE  
cdc13  
868

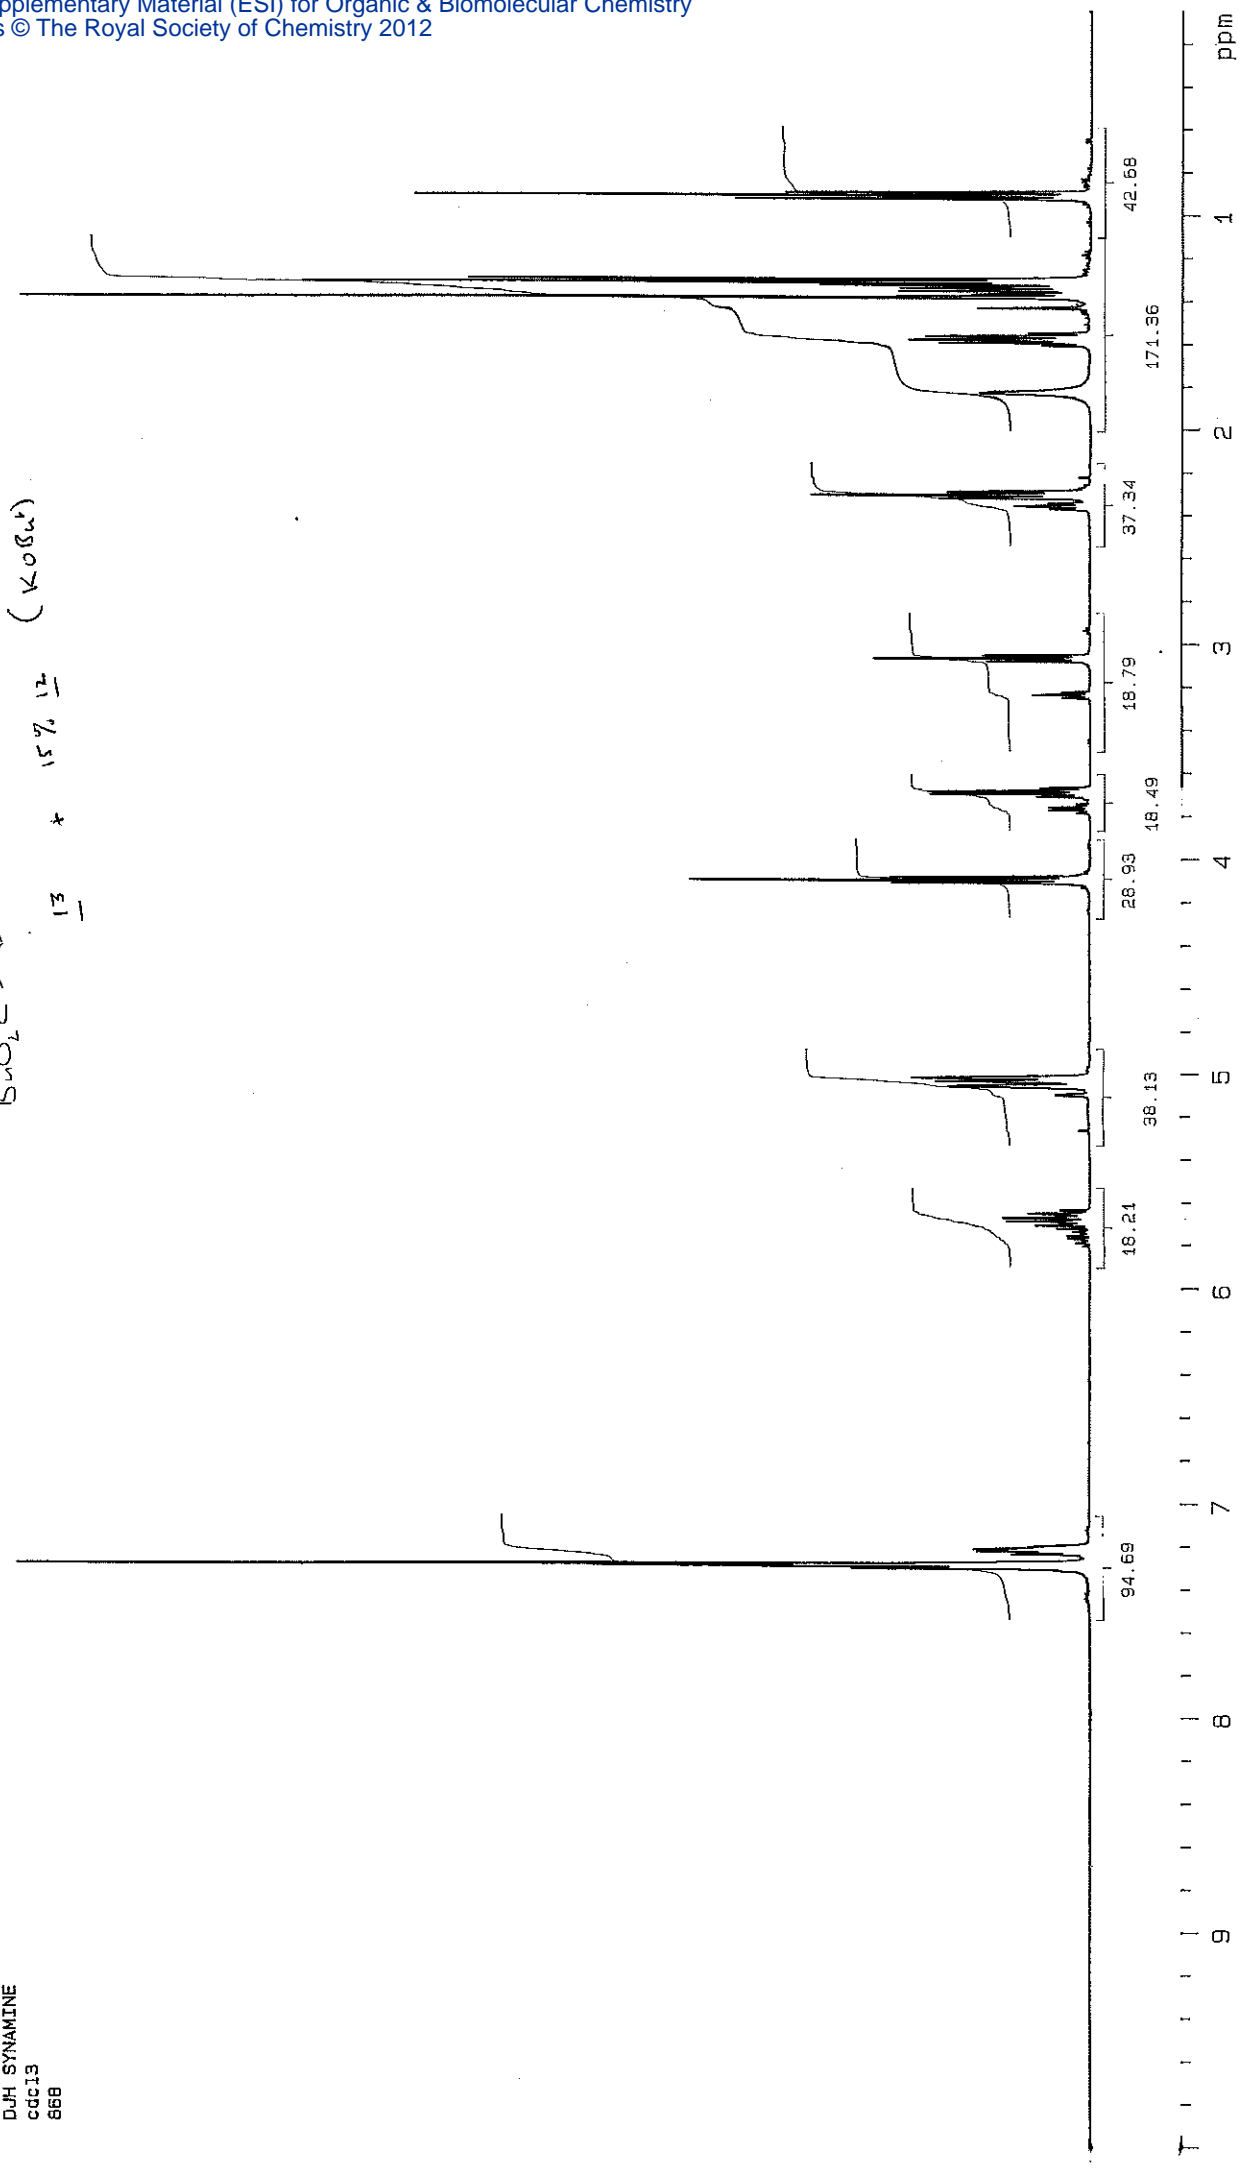

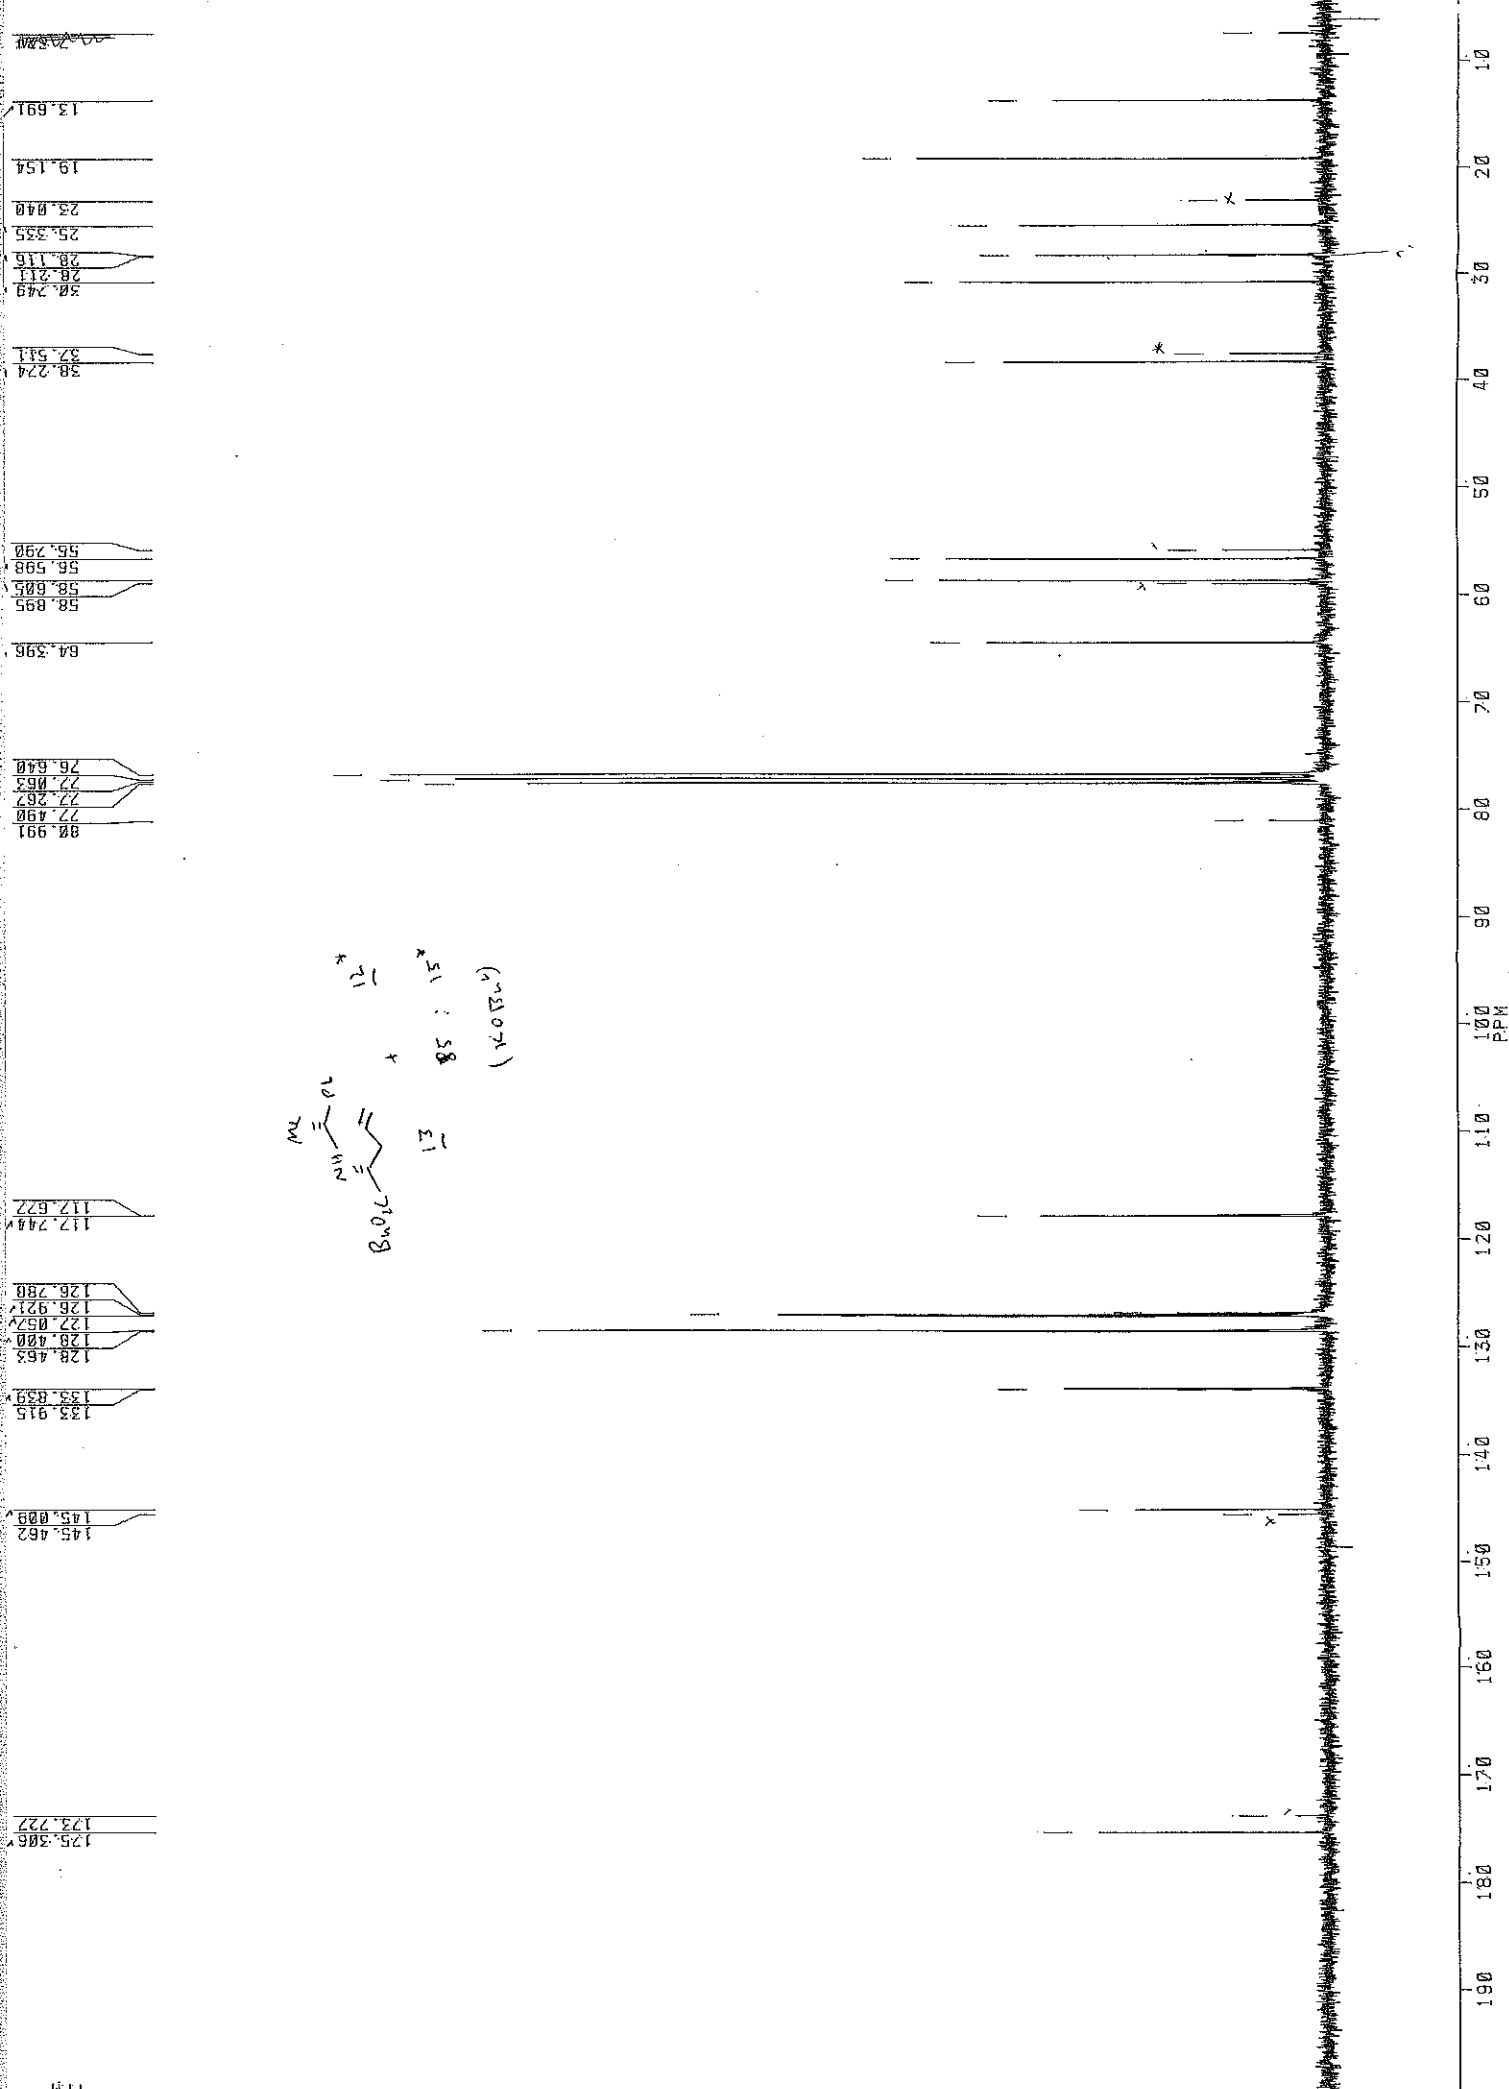

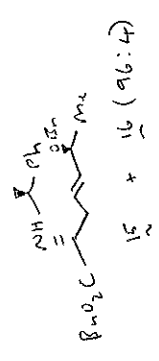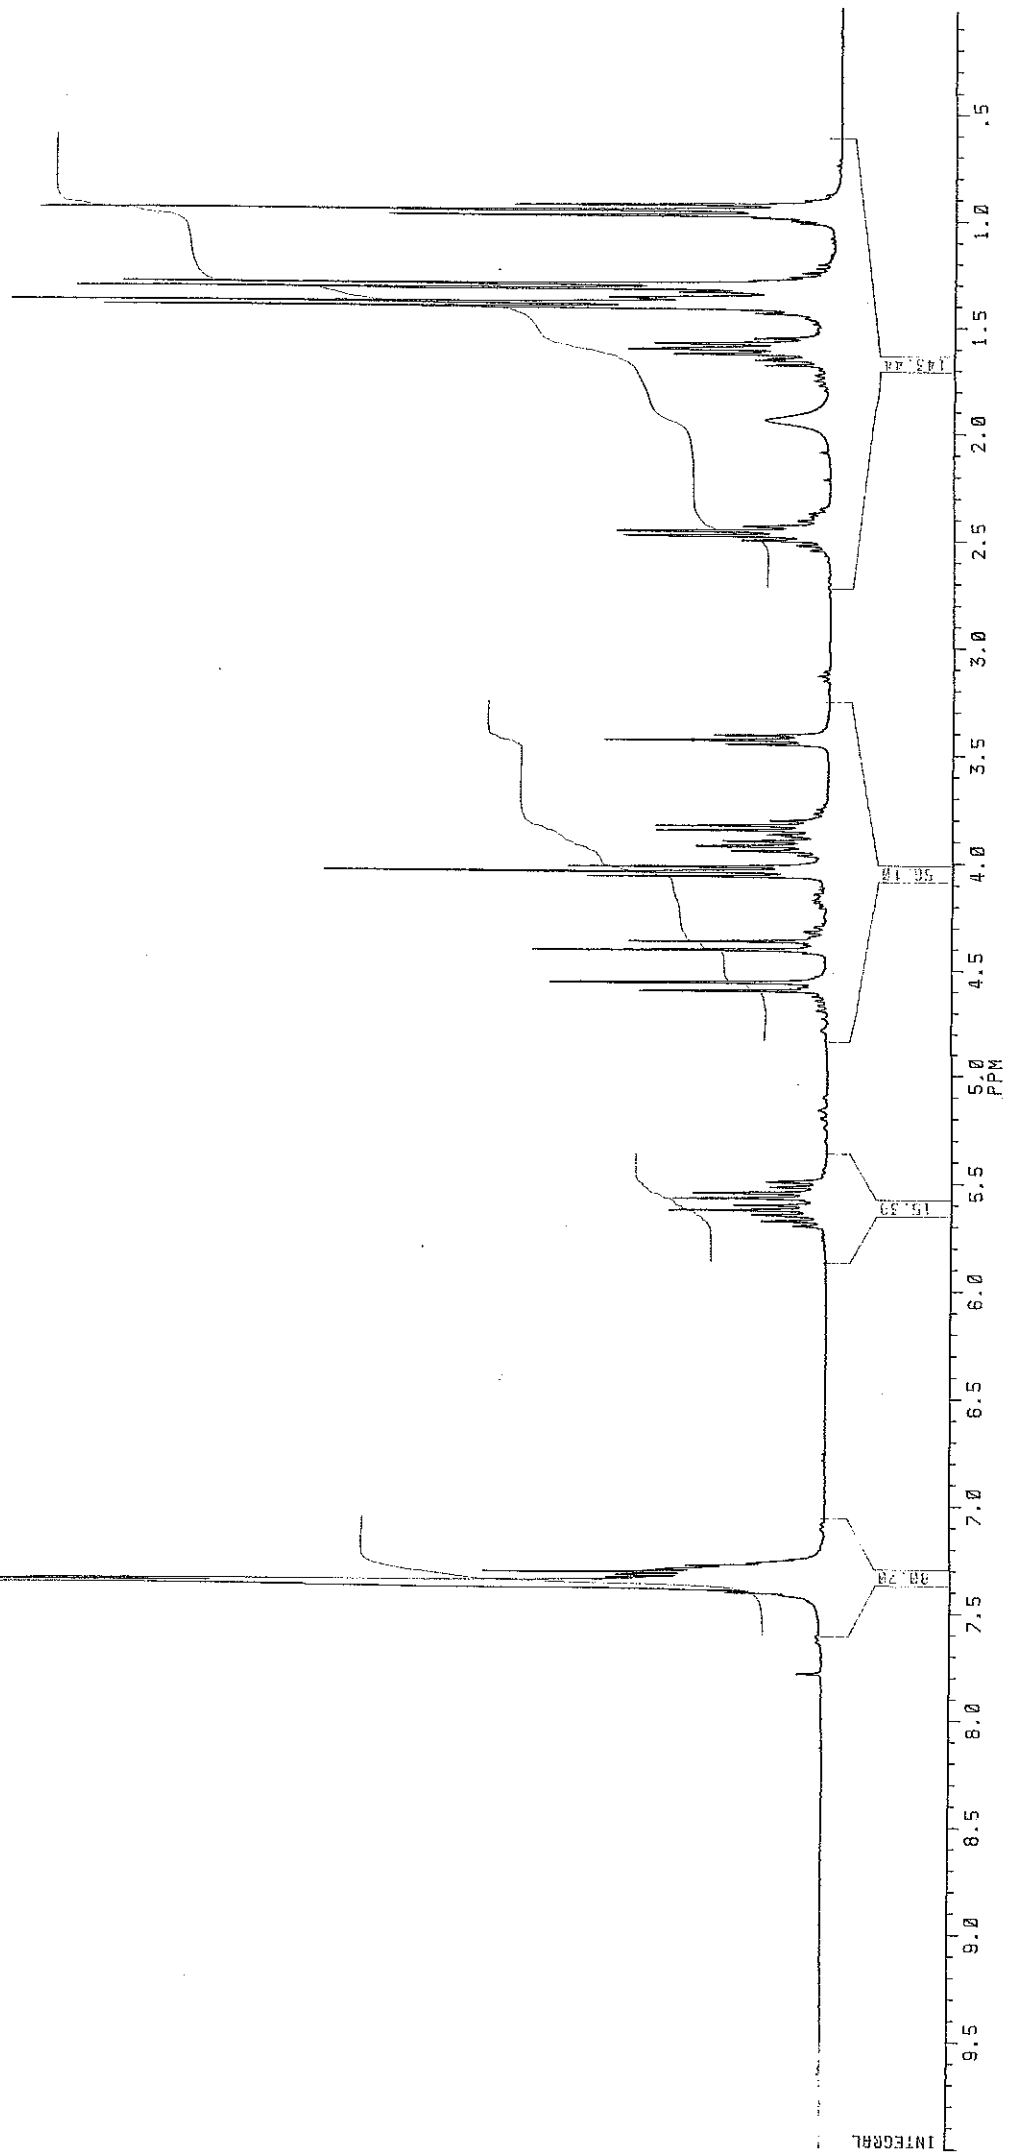

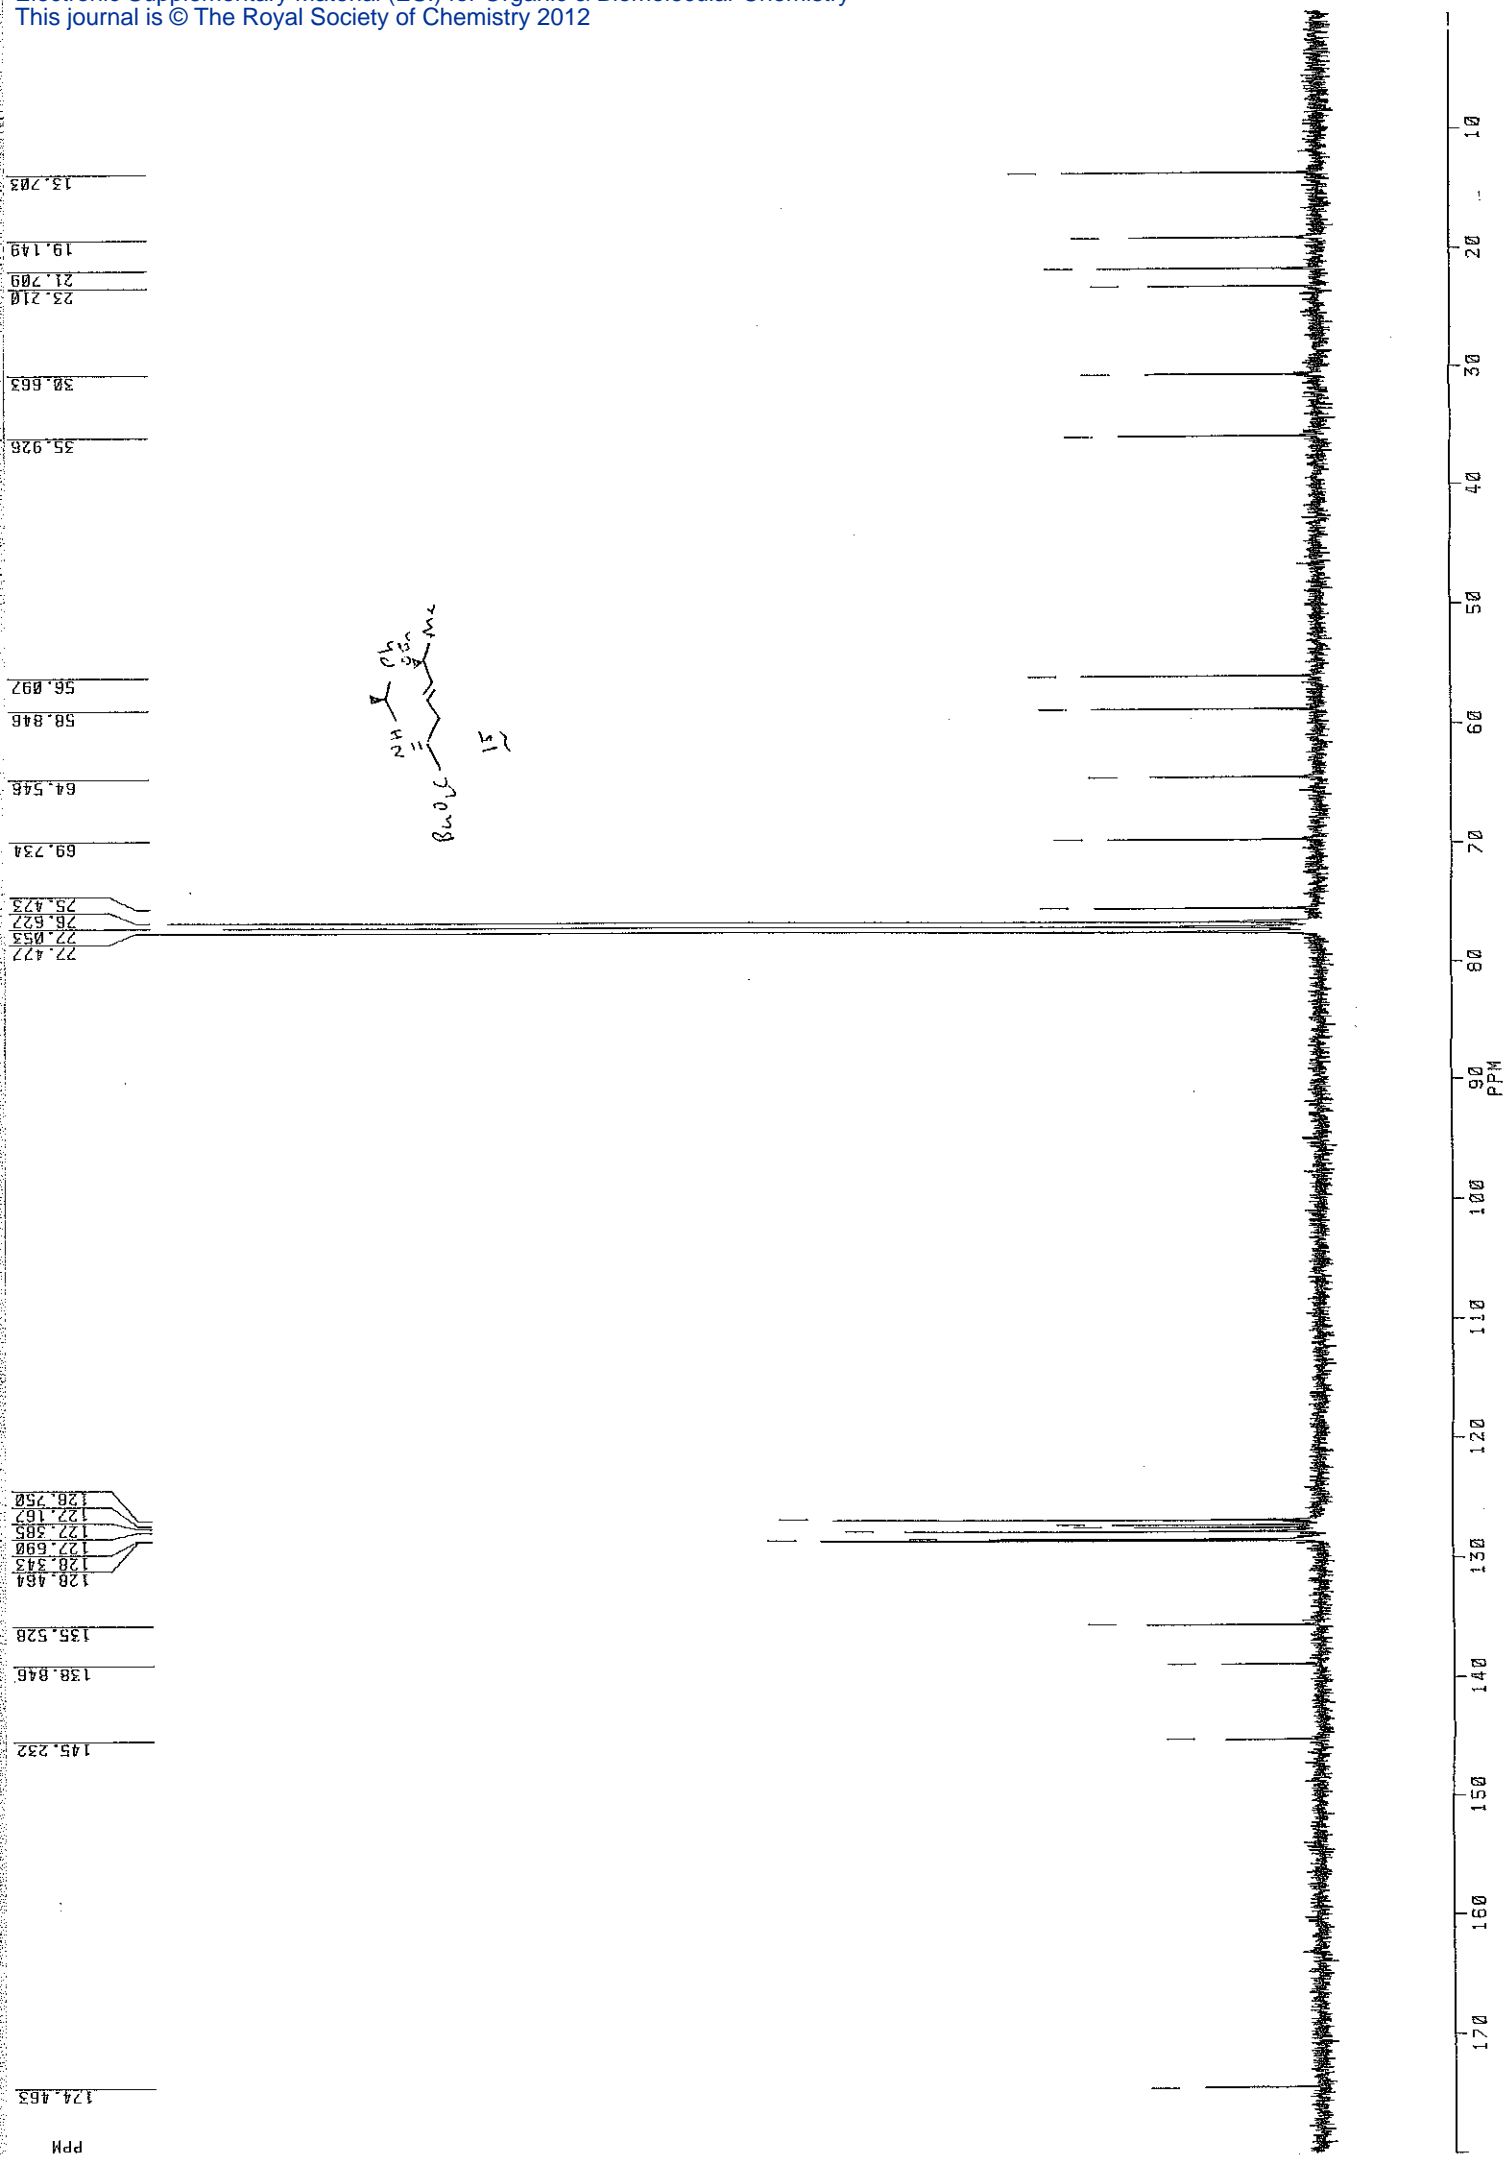

CUY  
PI  
D  
SF  
SI  
TD  
SW  
PW  
RD  
RQ  
RS  
NS  
OZ  
DF  
LB  
UR

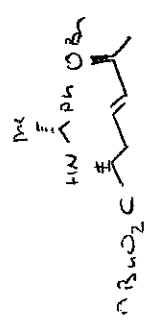

17 + 18  
92:8

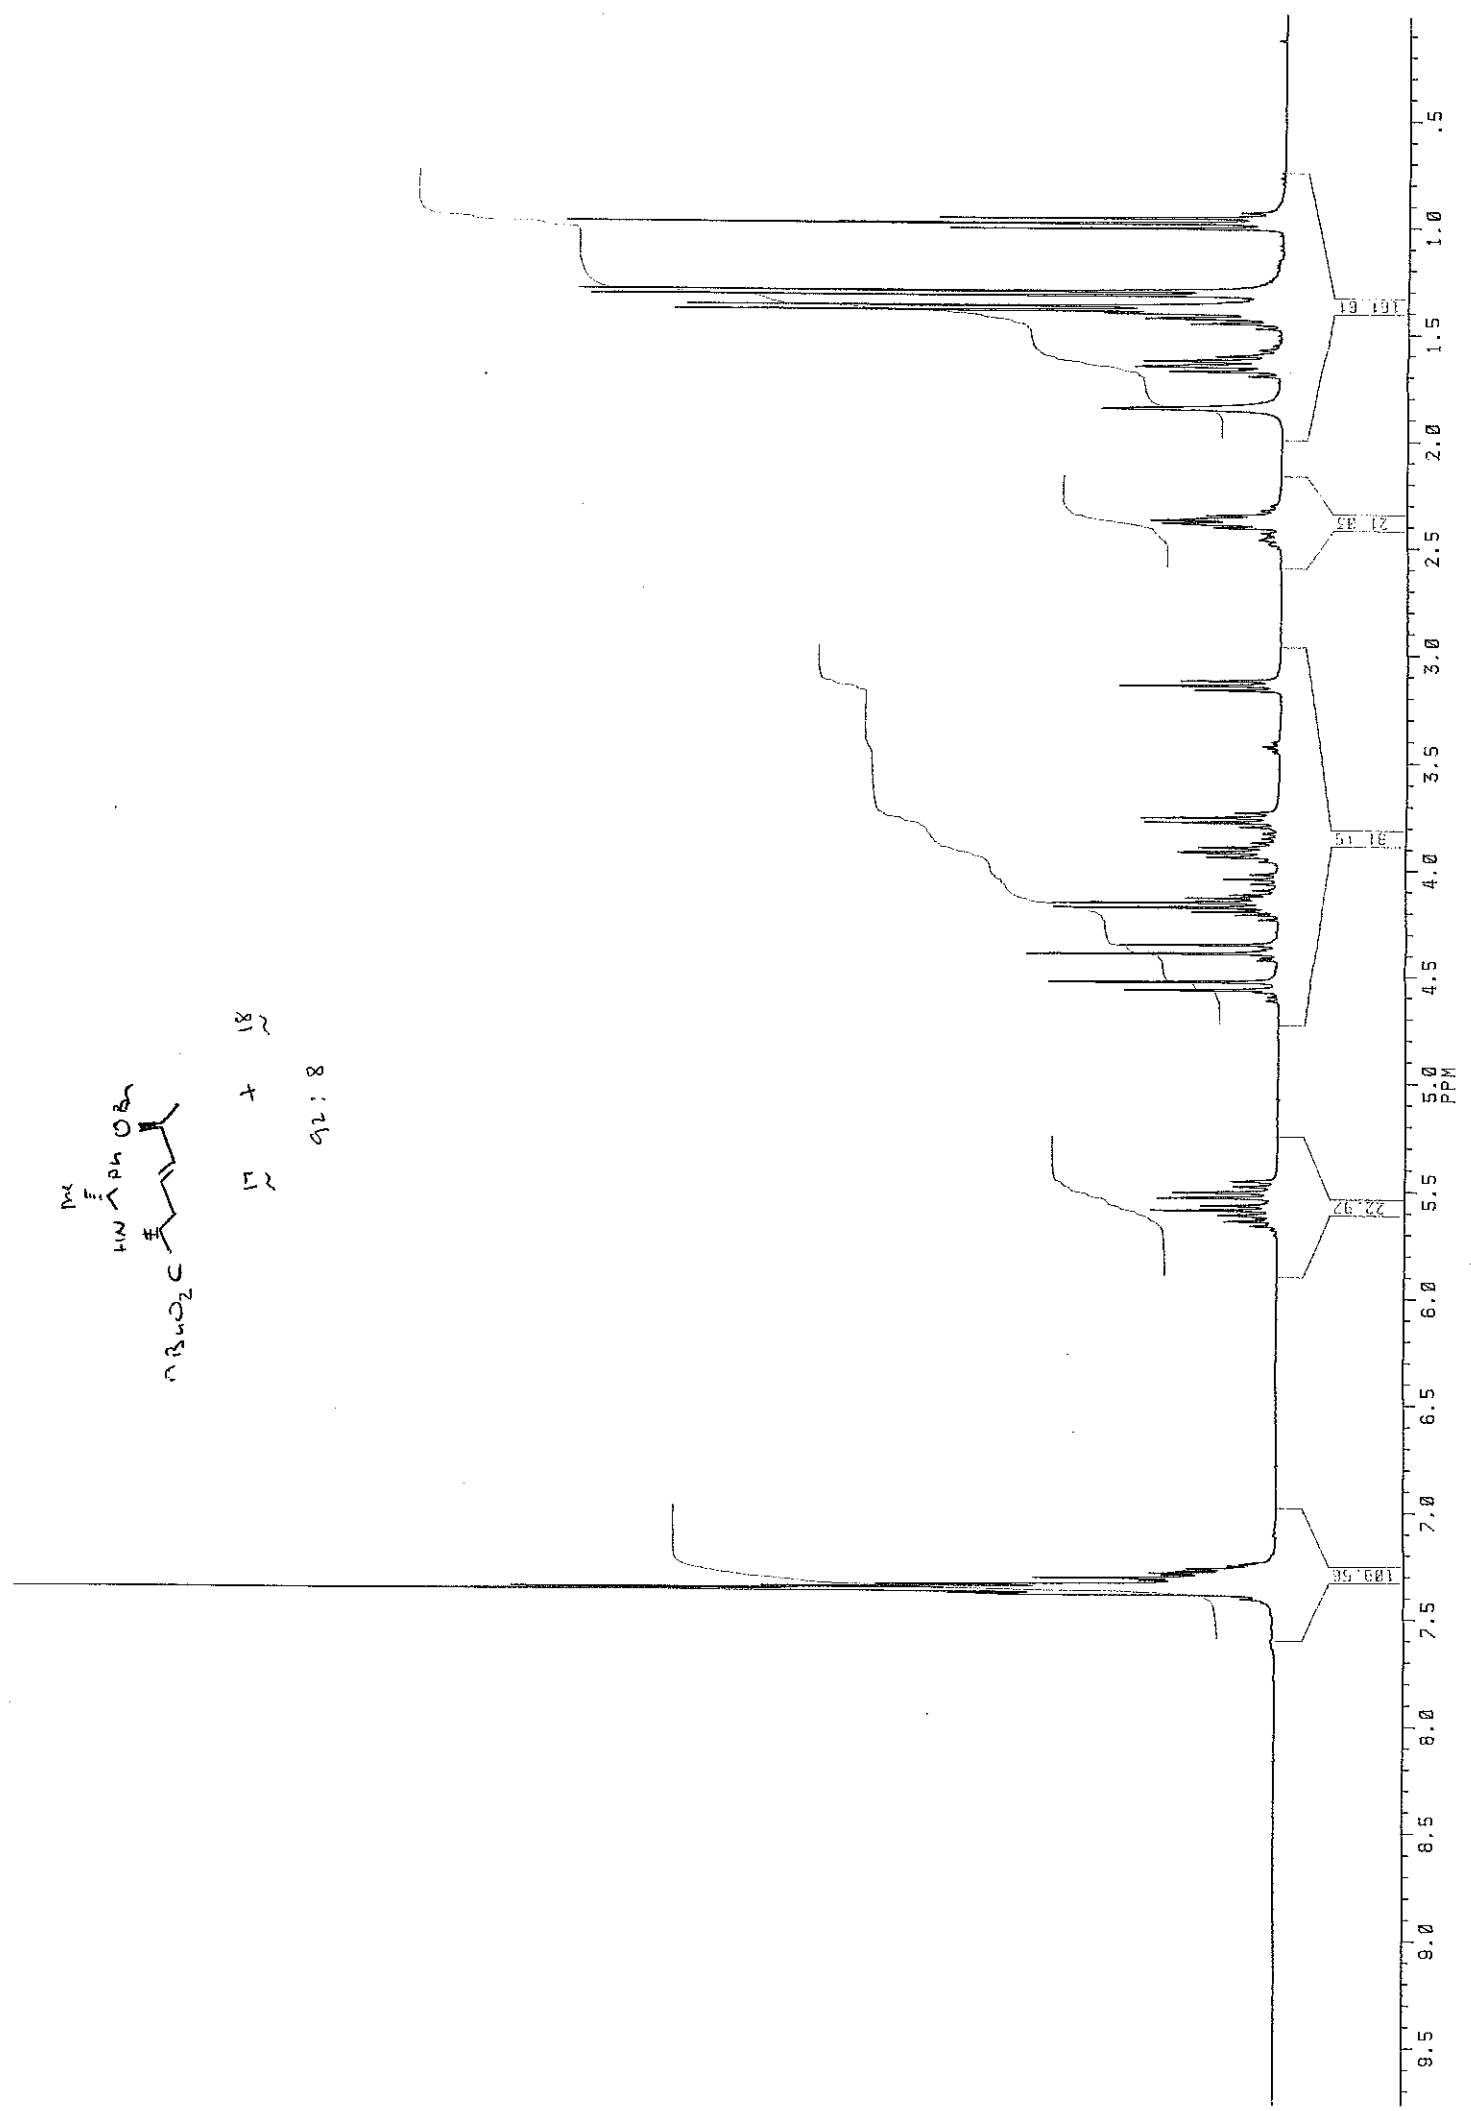

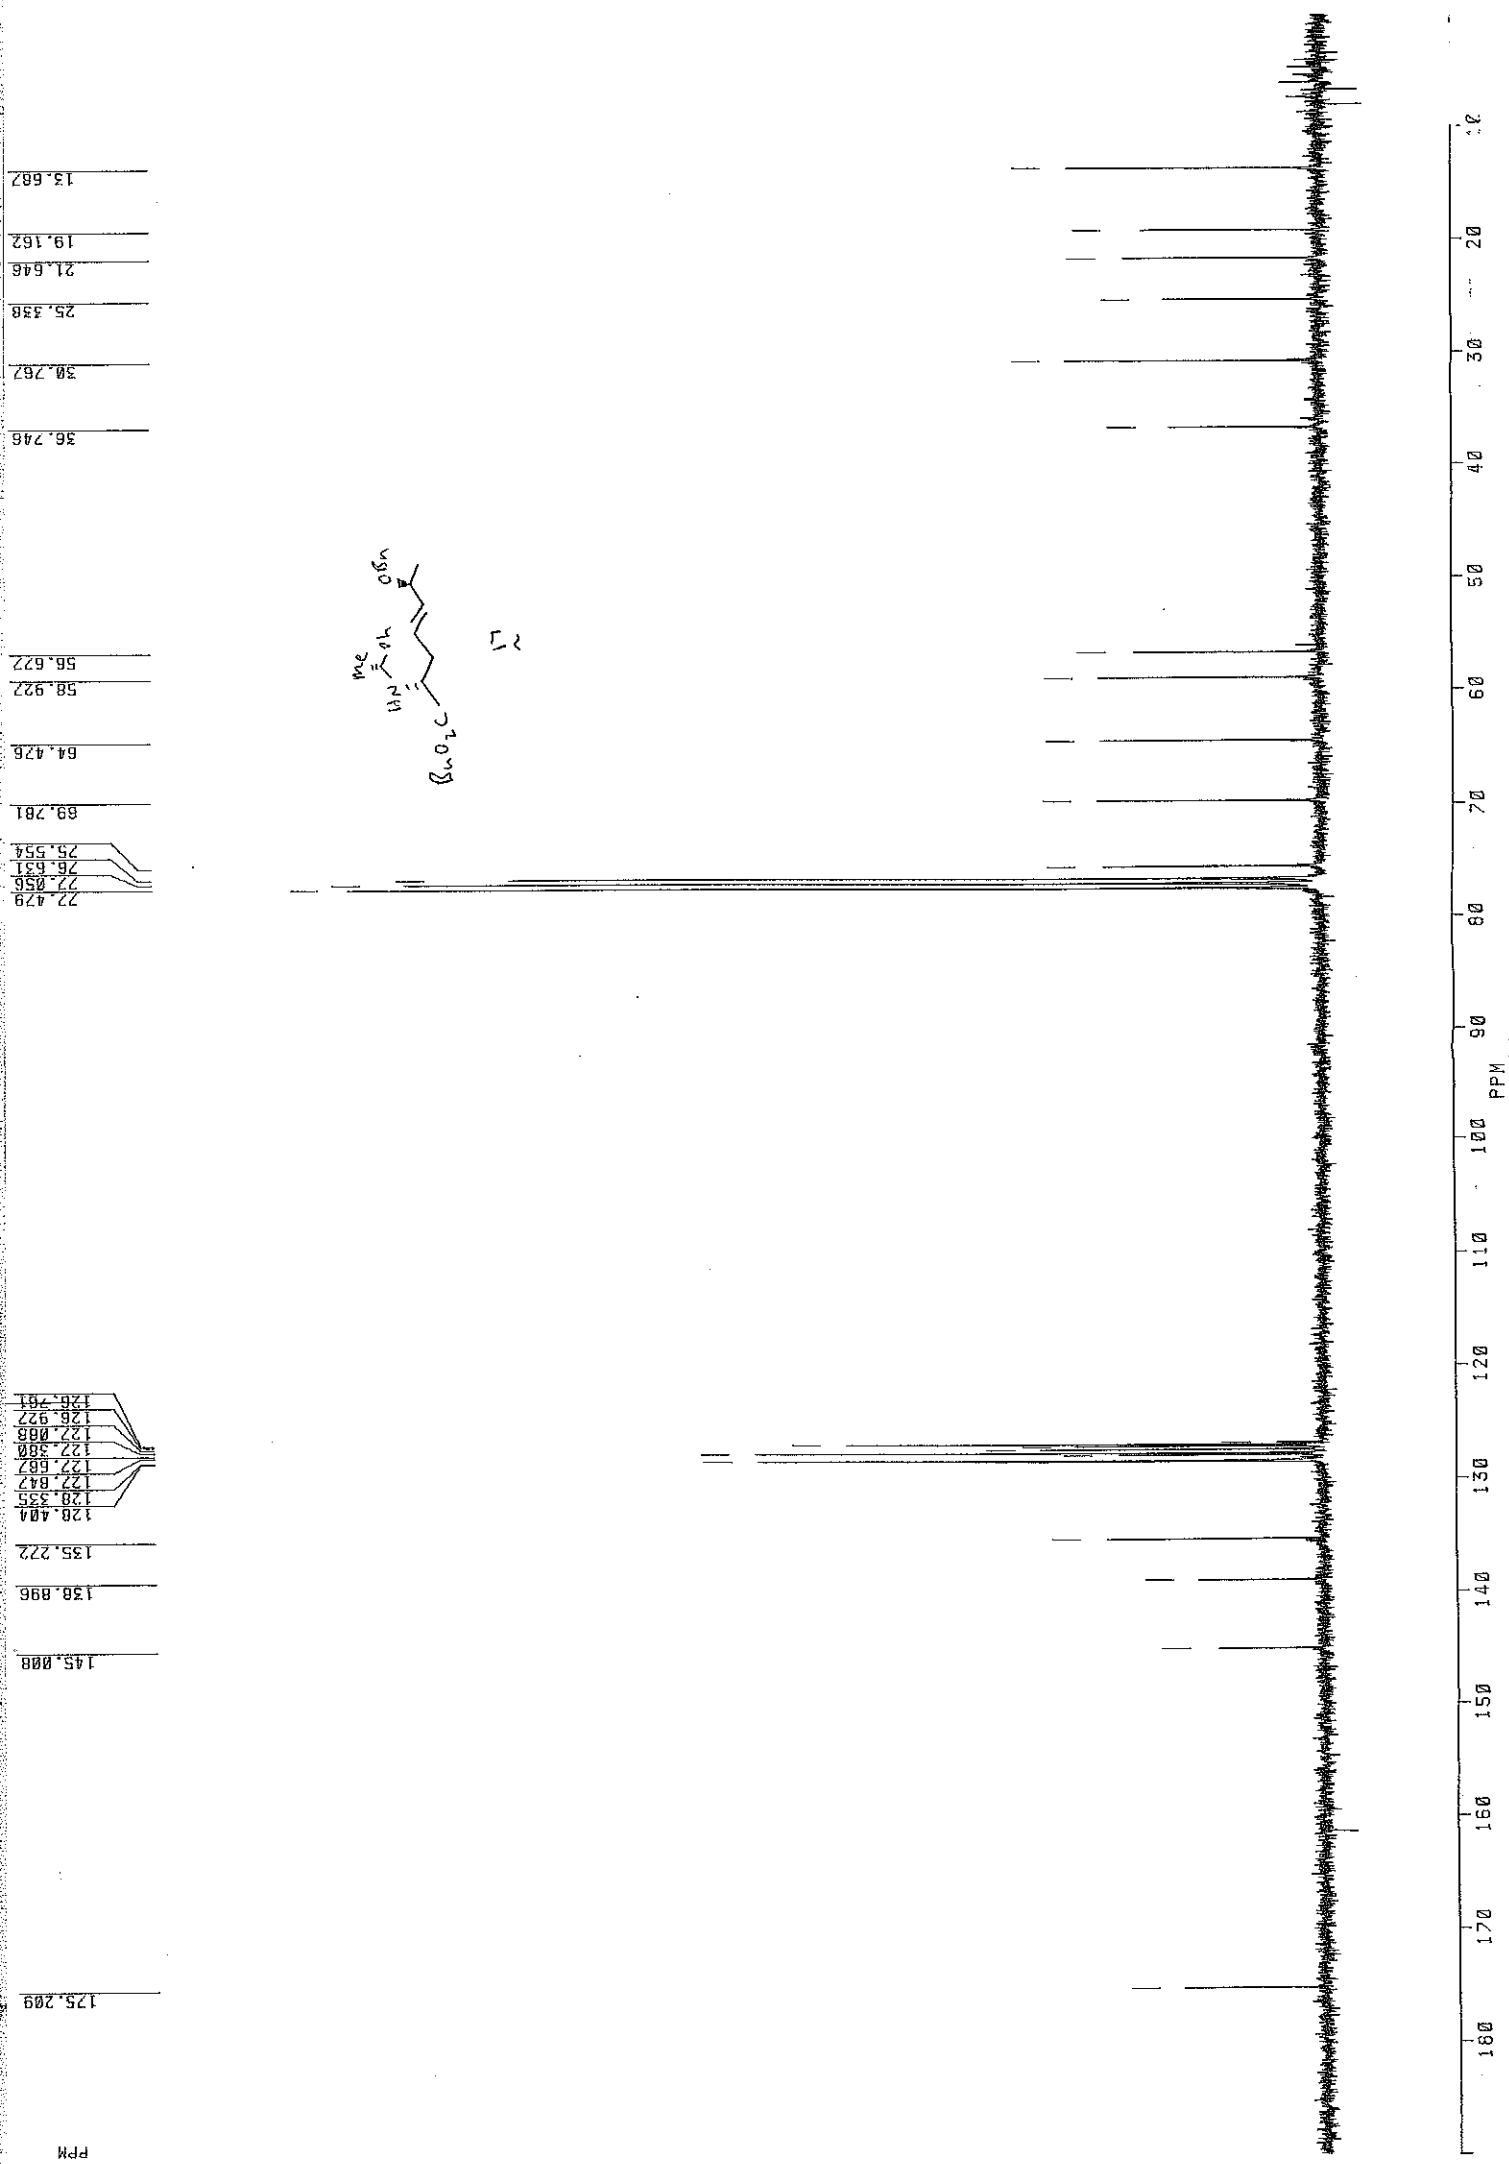



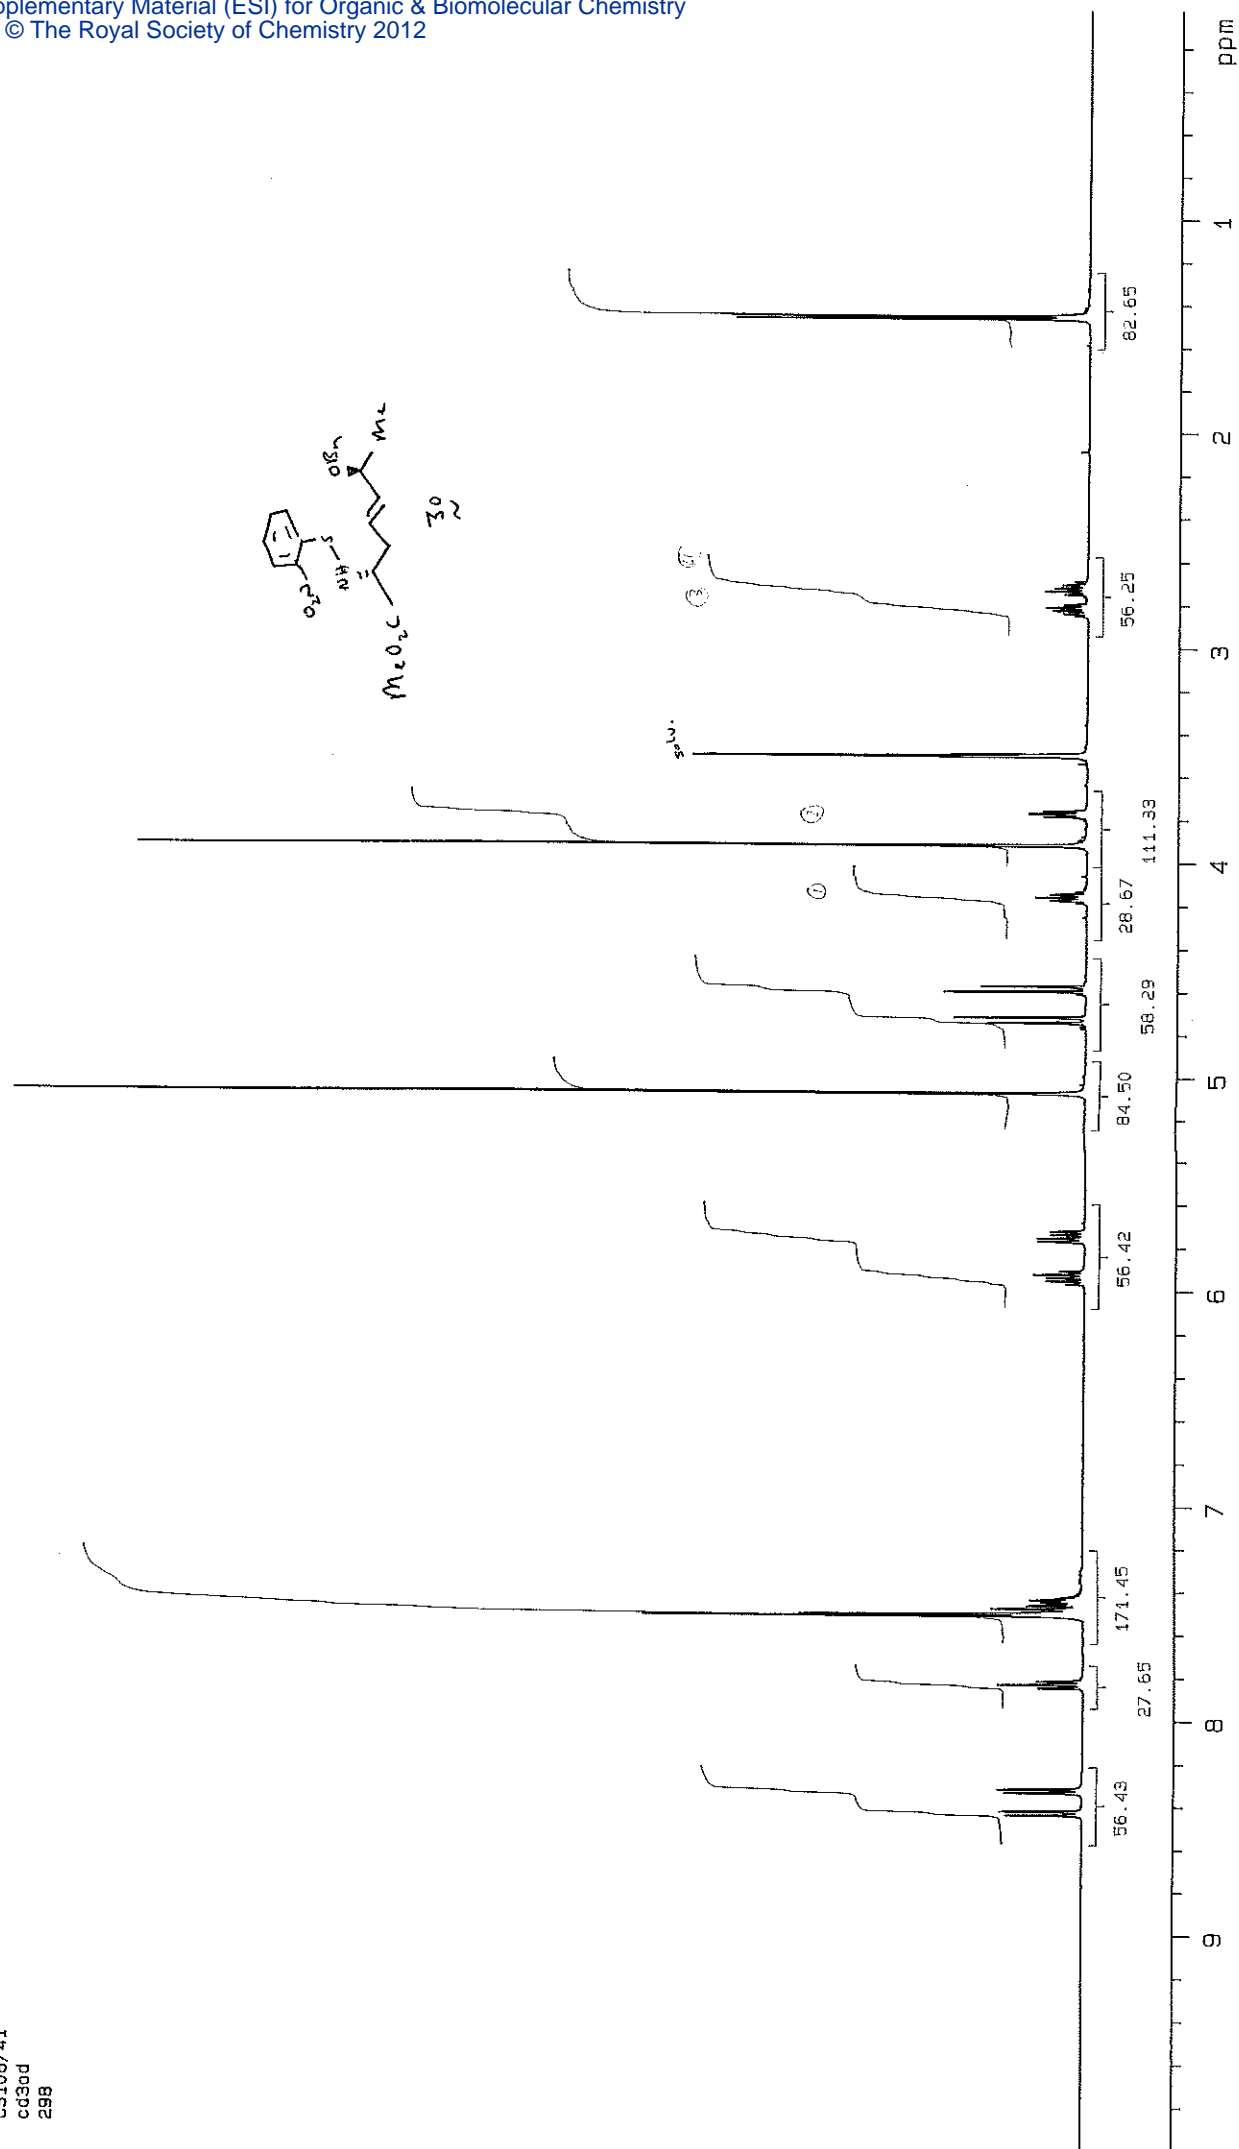

C129869.001.cv  
 BRUKER AC/AM250  
 C129869.001.cv

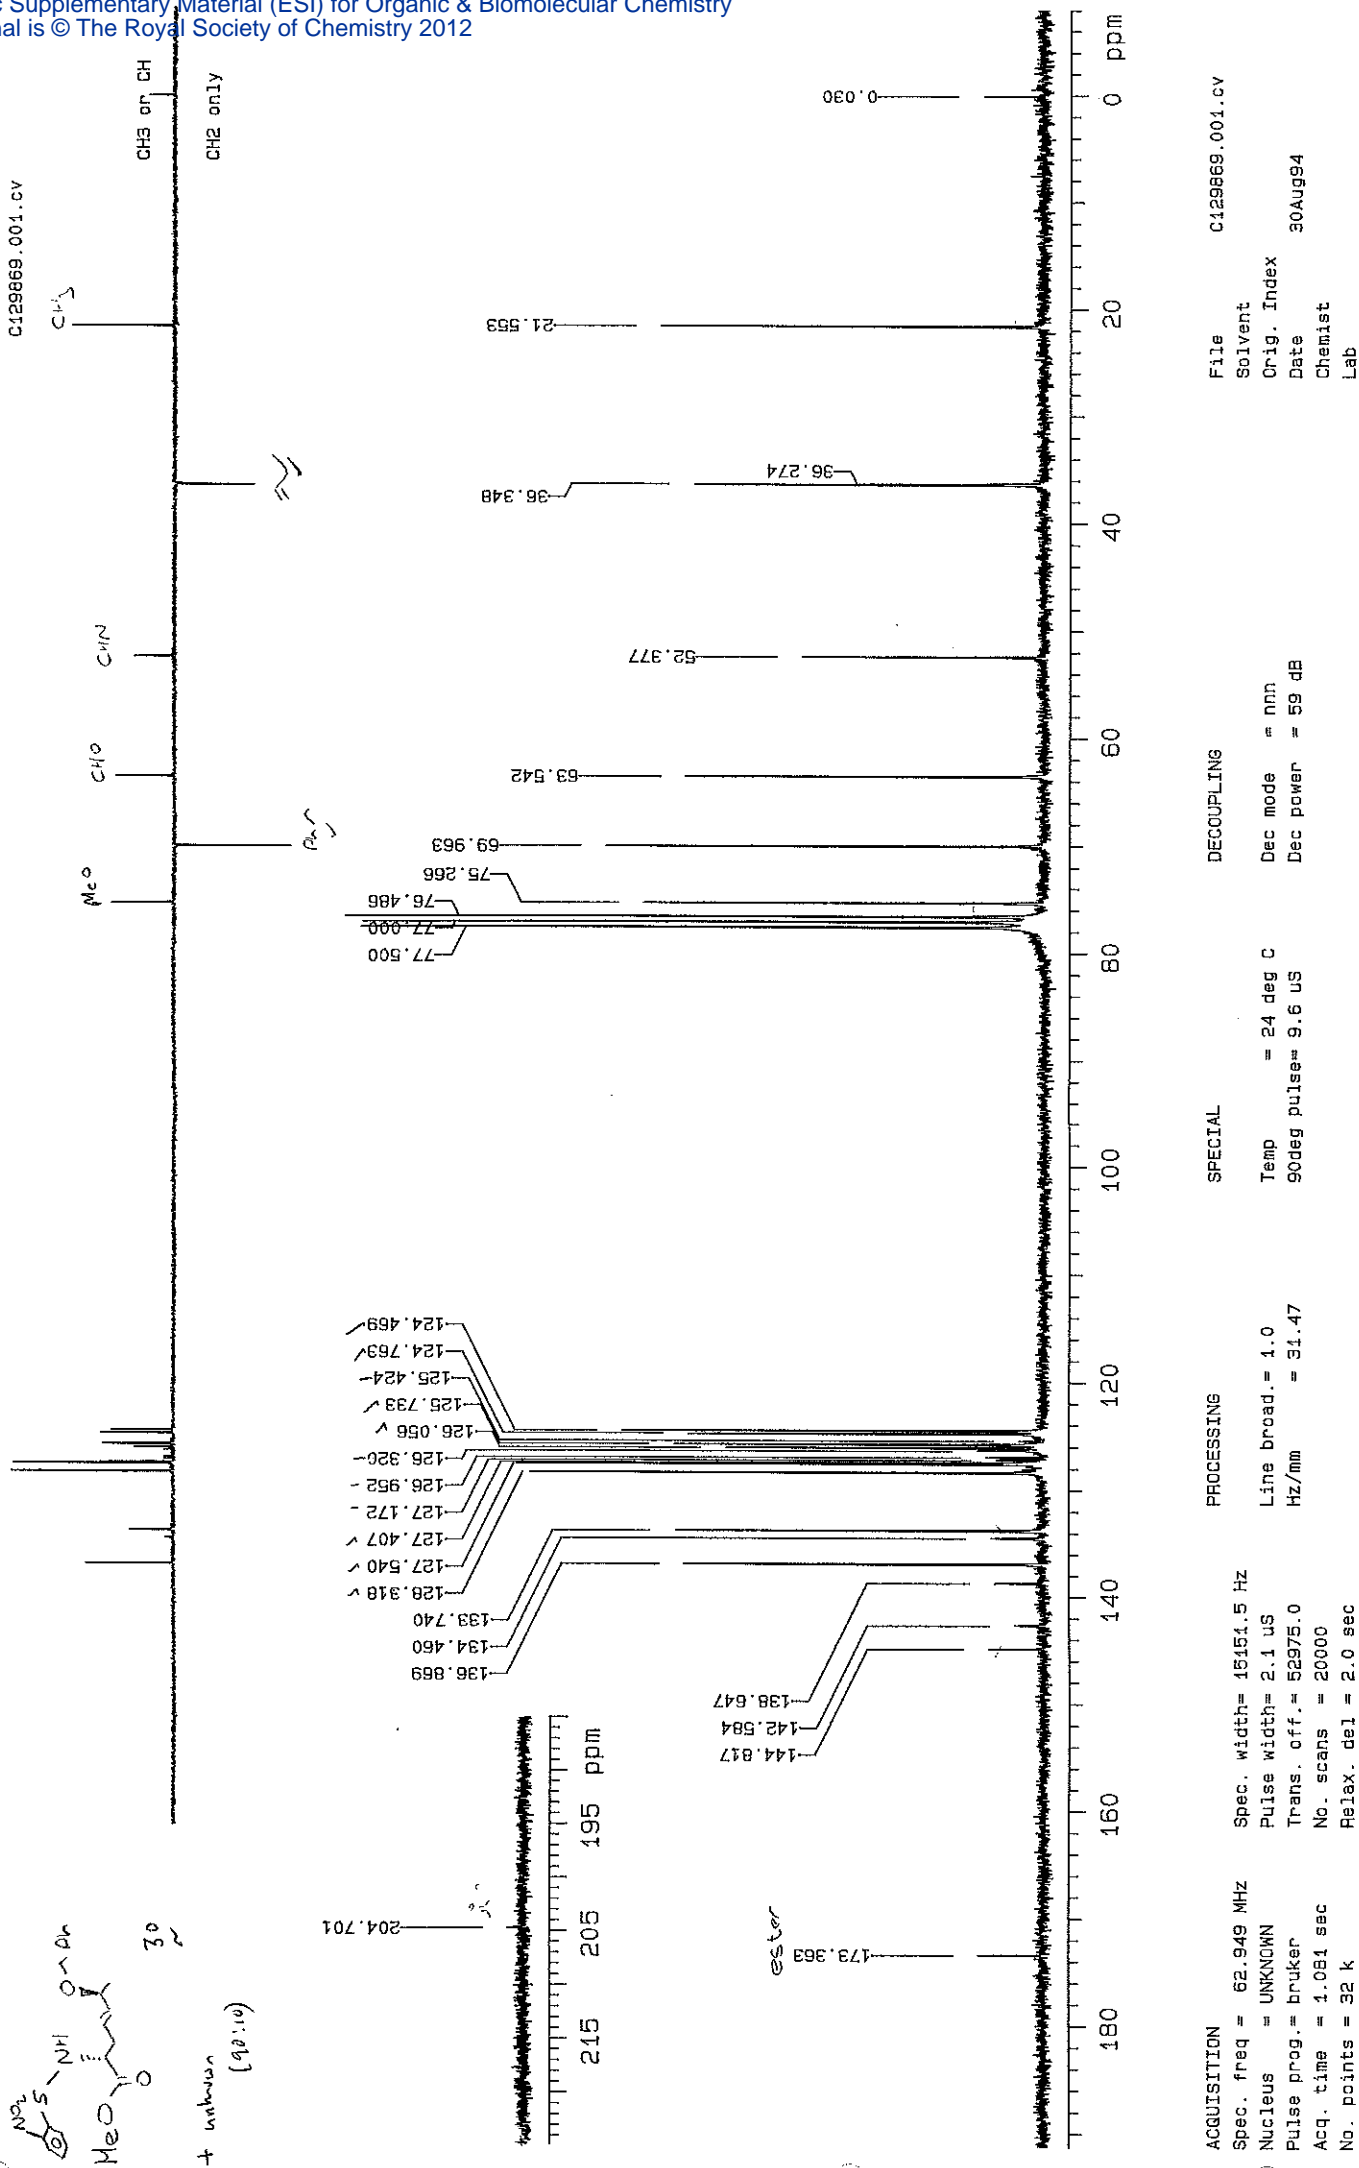

ACQUISITION  
 Spec. freq = 62.949 MHz  
 Nucleus = UNKNOWN  
 Pulse prog. = bruker  
 Acq. time = 1.081 sec  
 No. points = 32 k

PROCESsing  
 Line broad. = 1.0  
 Hz/mm = 31.47

SPECIAL  
 Temp = 24 deg C  
 90deg pulse = 9.6 uS

DECOUPLING  
 Dec mode = nnn  
 Dec power = 59 dB

File C129869.001.cv  
 Solvent  
 Orig. Index  
 Date 30AUG94  
 Chemist  
 Lab

D. Hallett  
DJH3/292  
cdc13  
329

"crude"

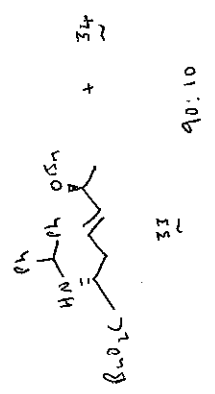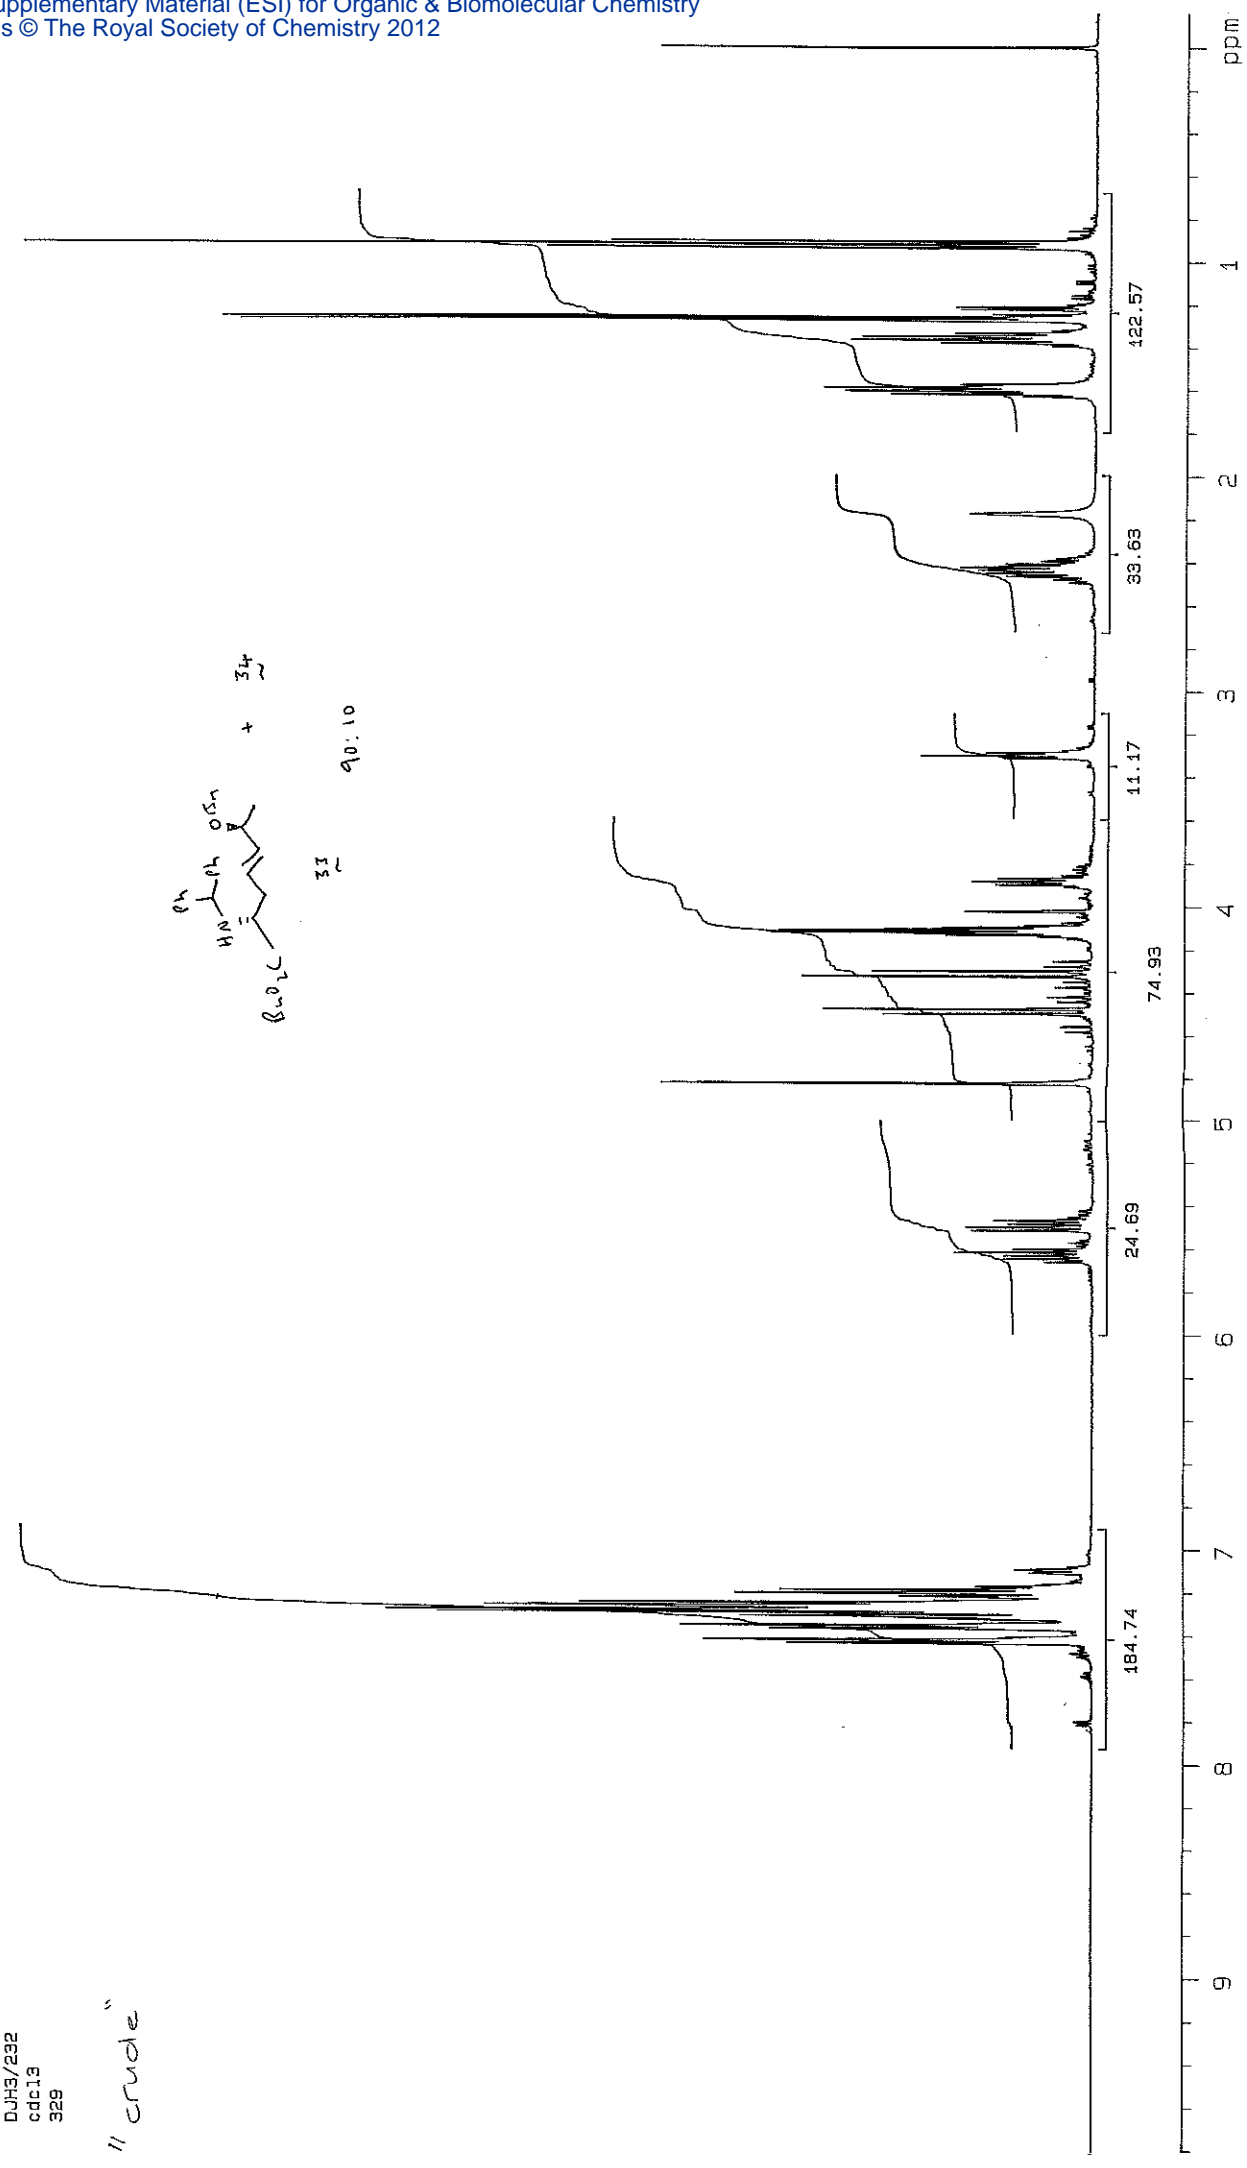

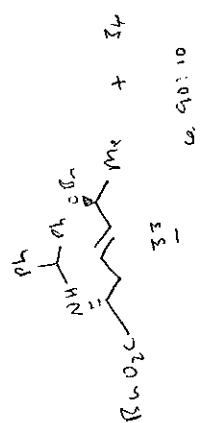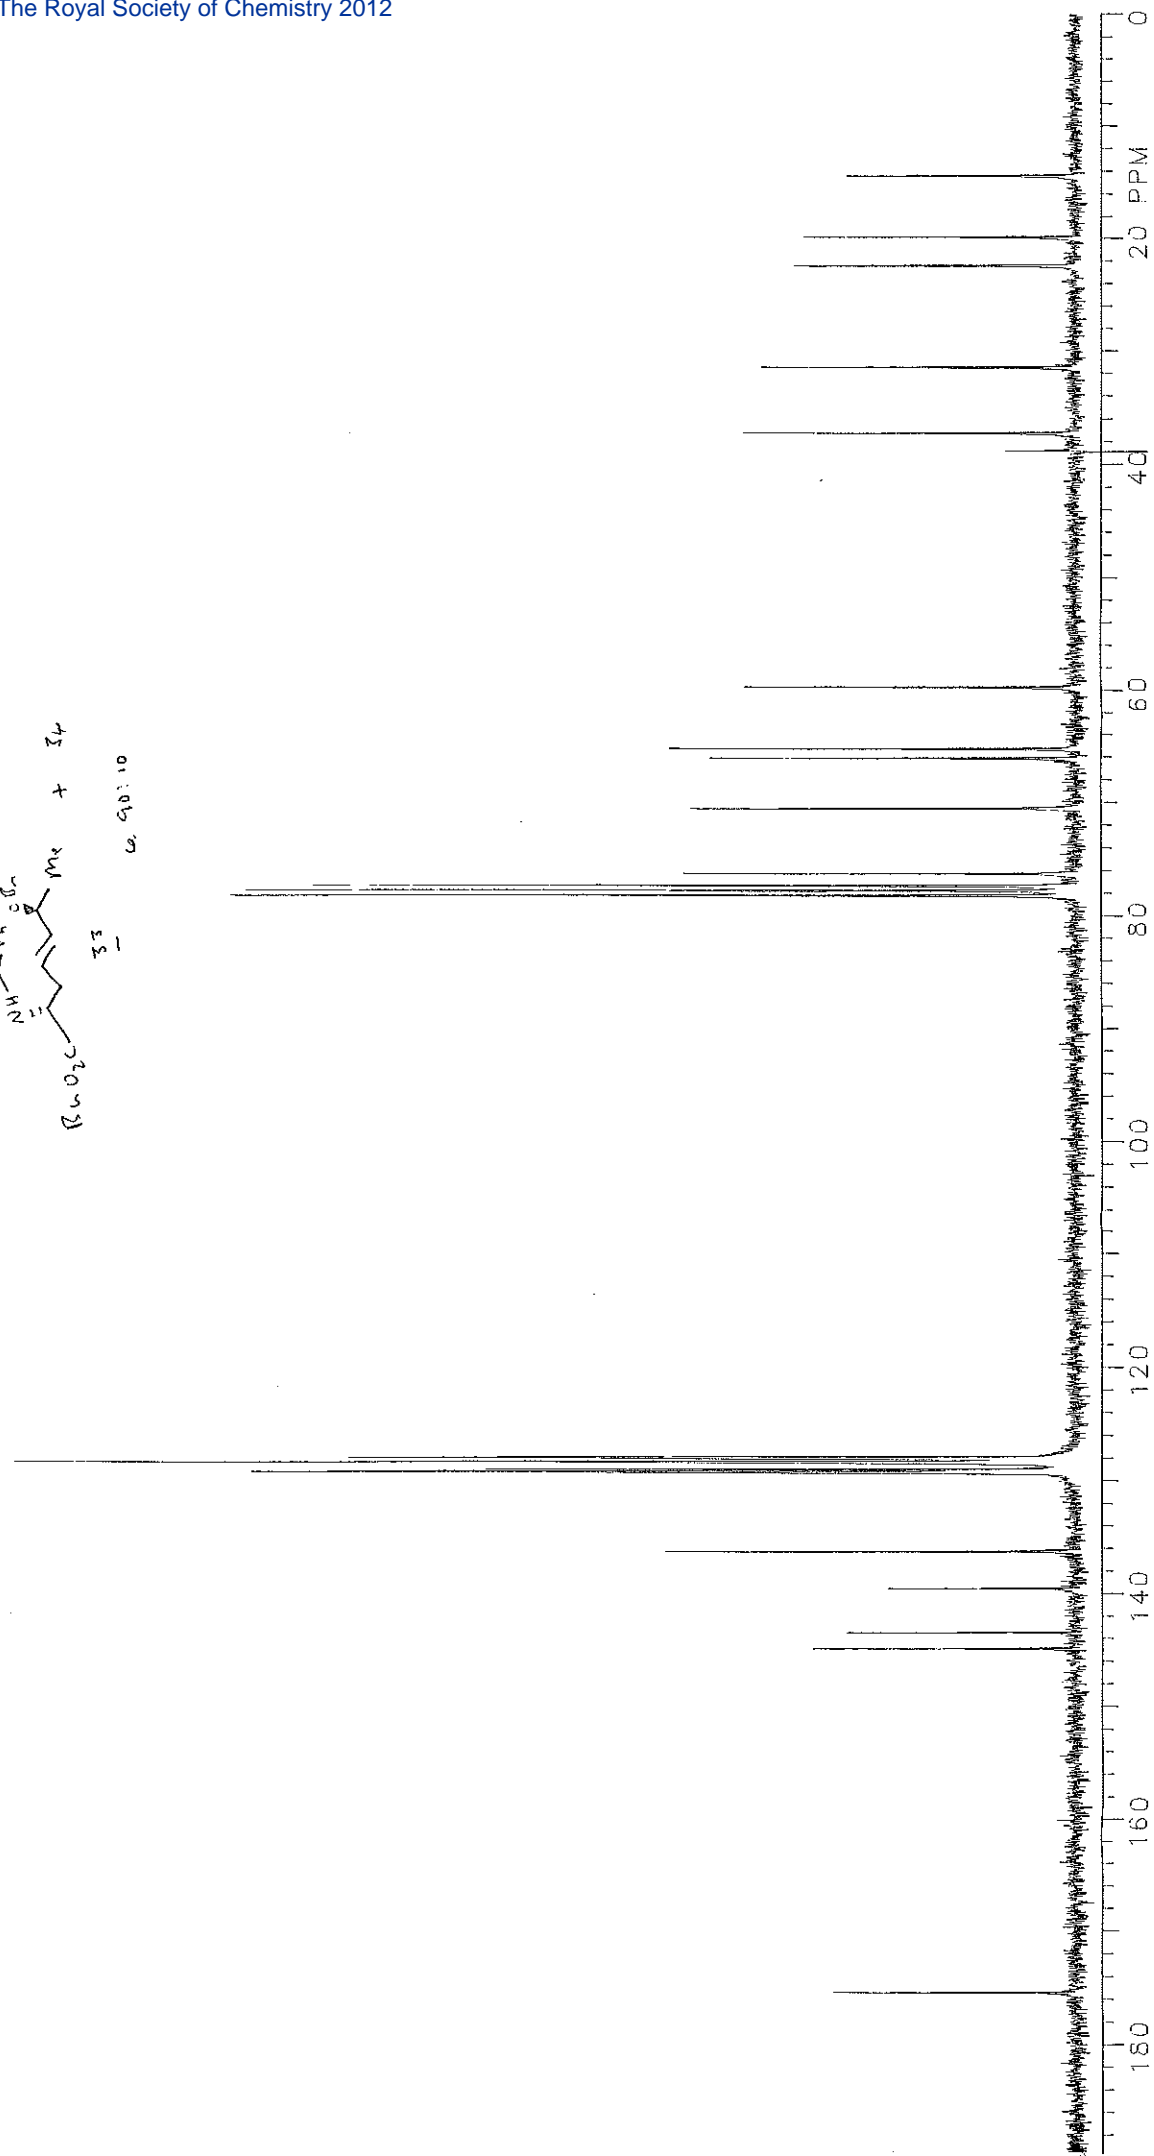

300MHz 421 D. HALLETT DJHS-7533 CDCL3

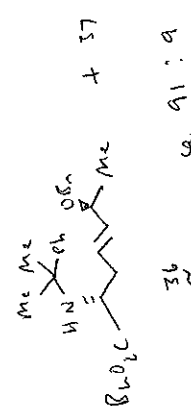

HM0A2400  
AU PROC  
STDI  
DATE 5-6  
SF 300  
D1 5287  
SI 52768  
TD 18384  
SW 4587  
PW 8  
RG 1  
RG 1  
NS 8  
DZ 4163  
DP 4L P  
LB 0  
CY 3355  
SR

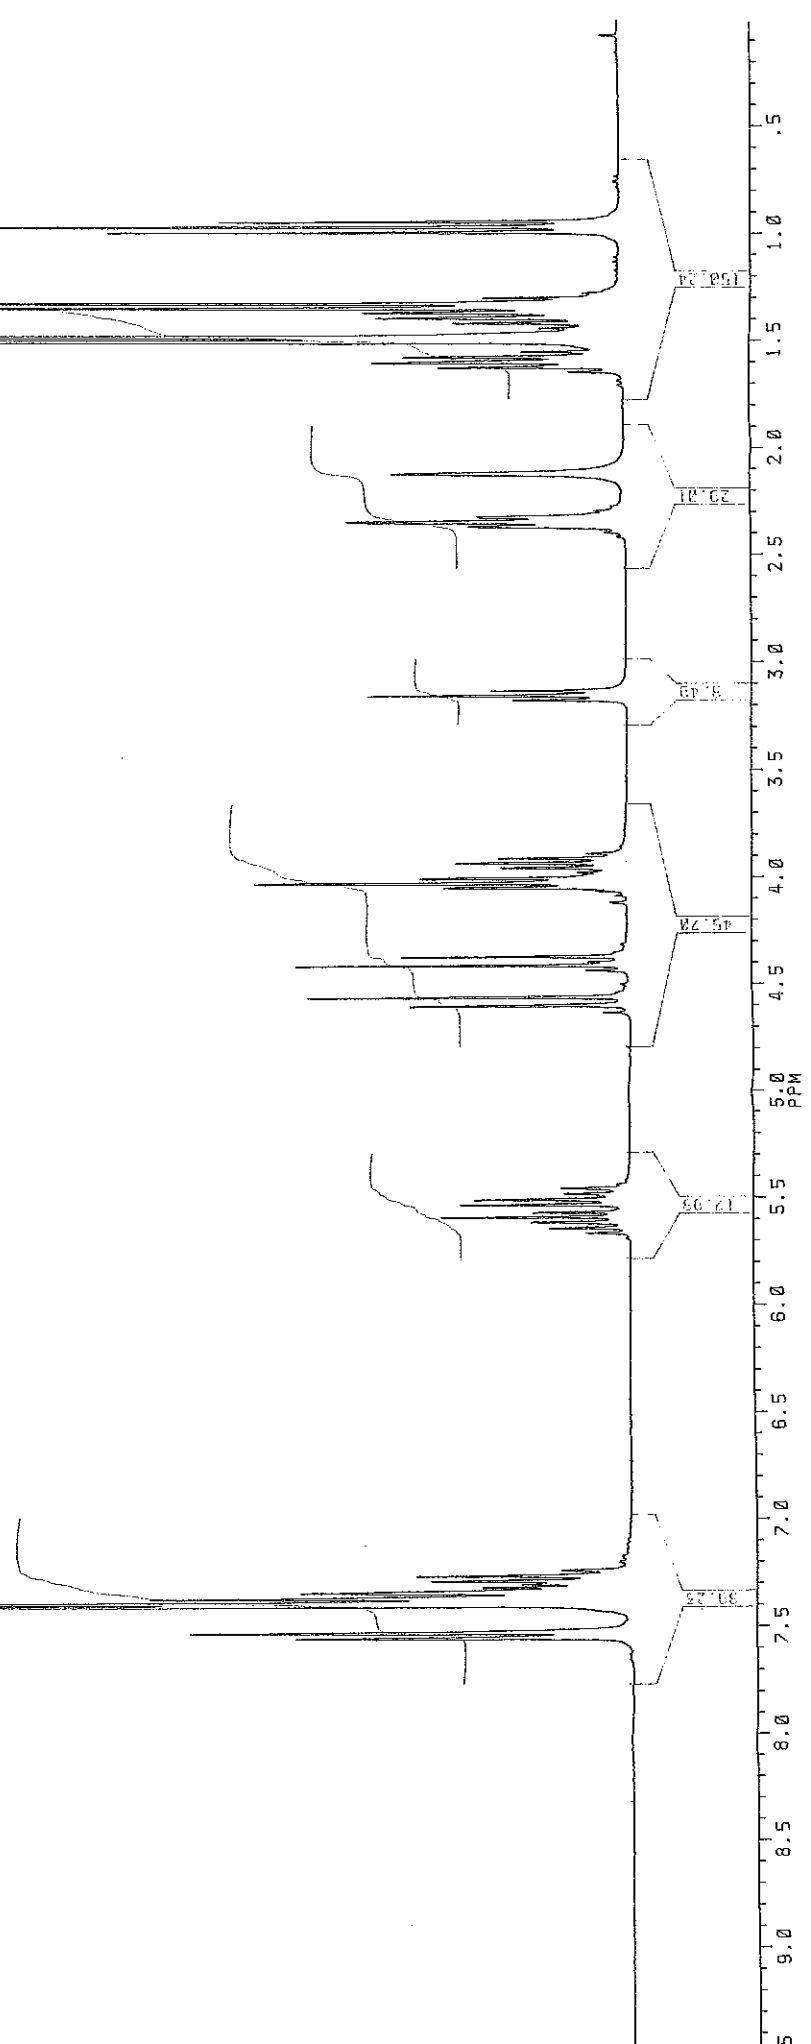

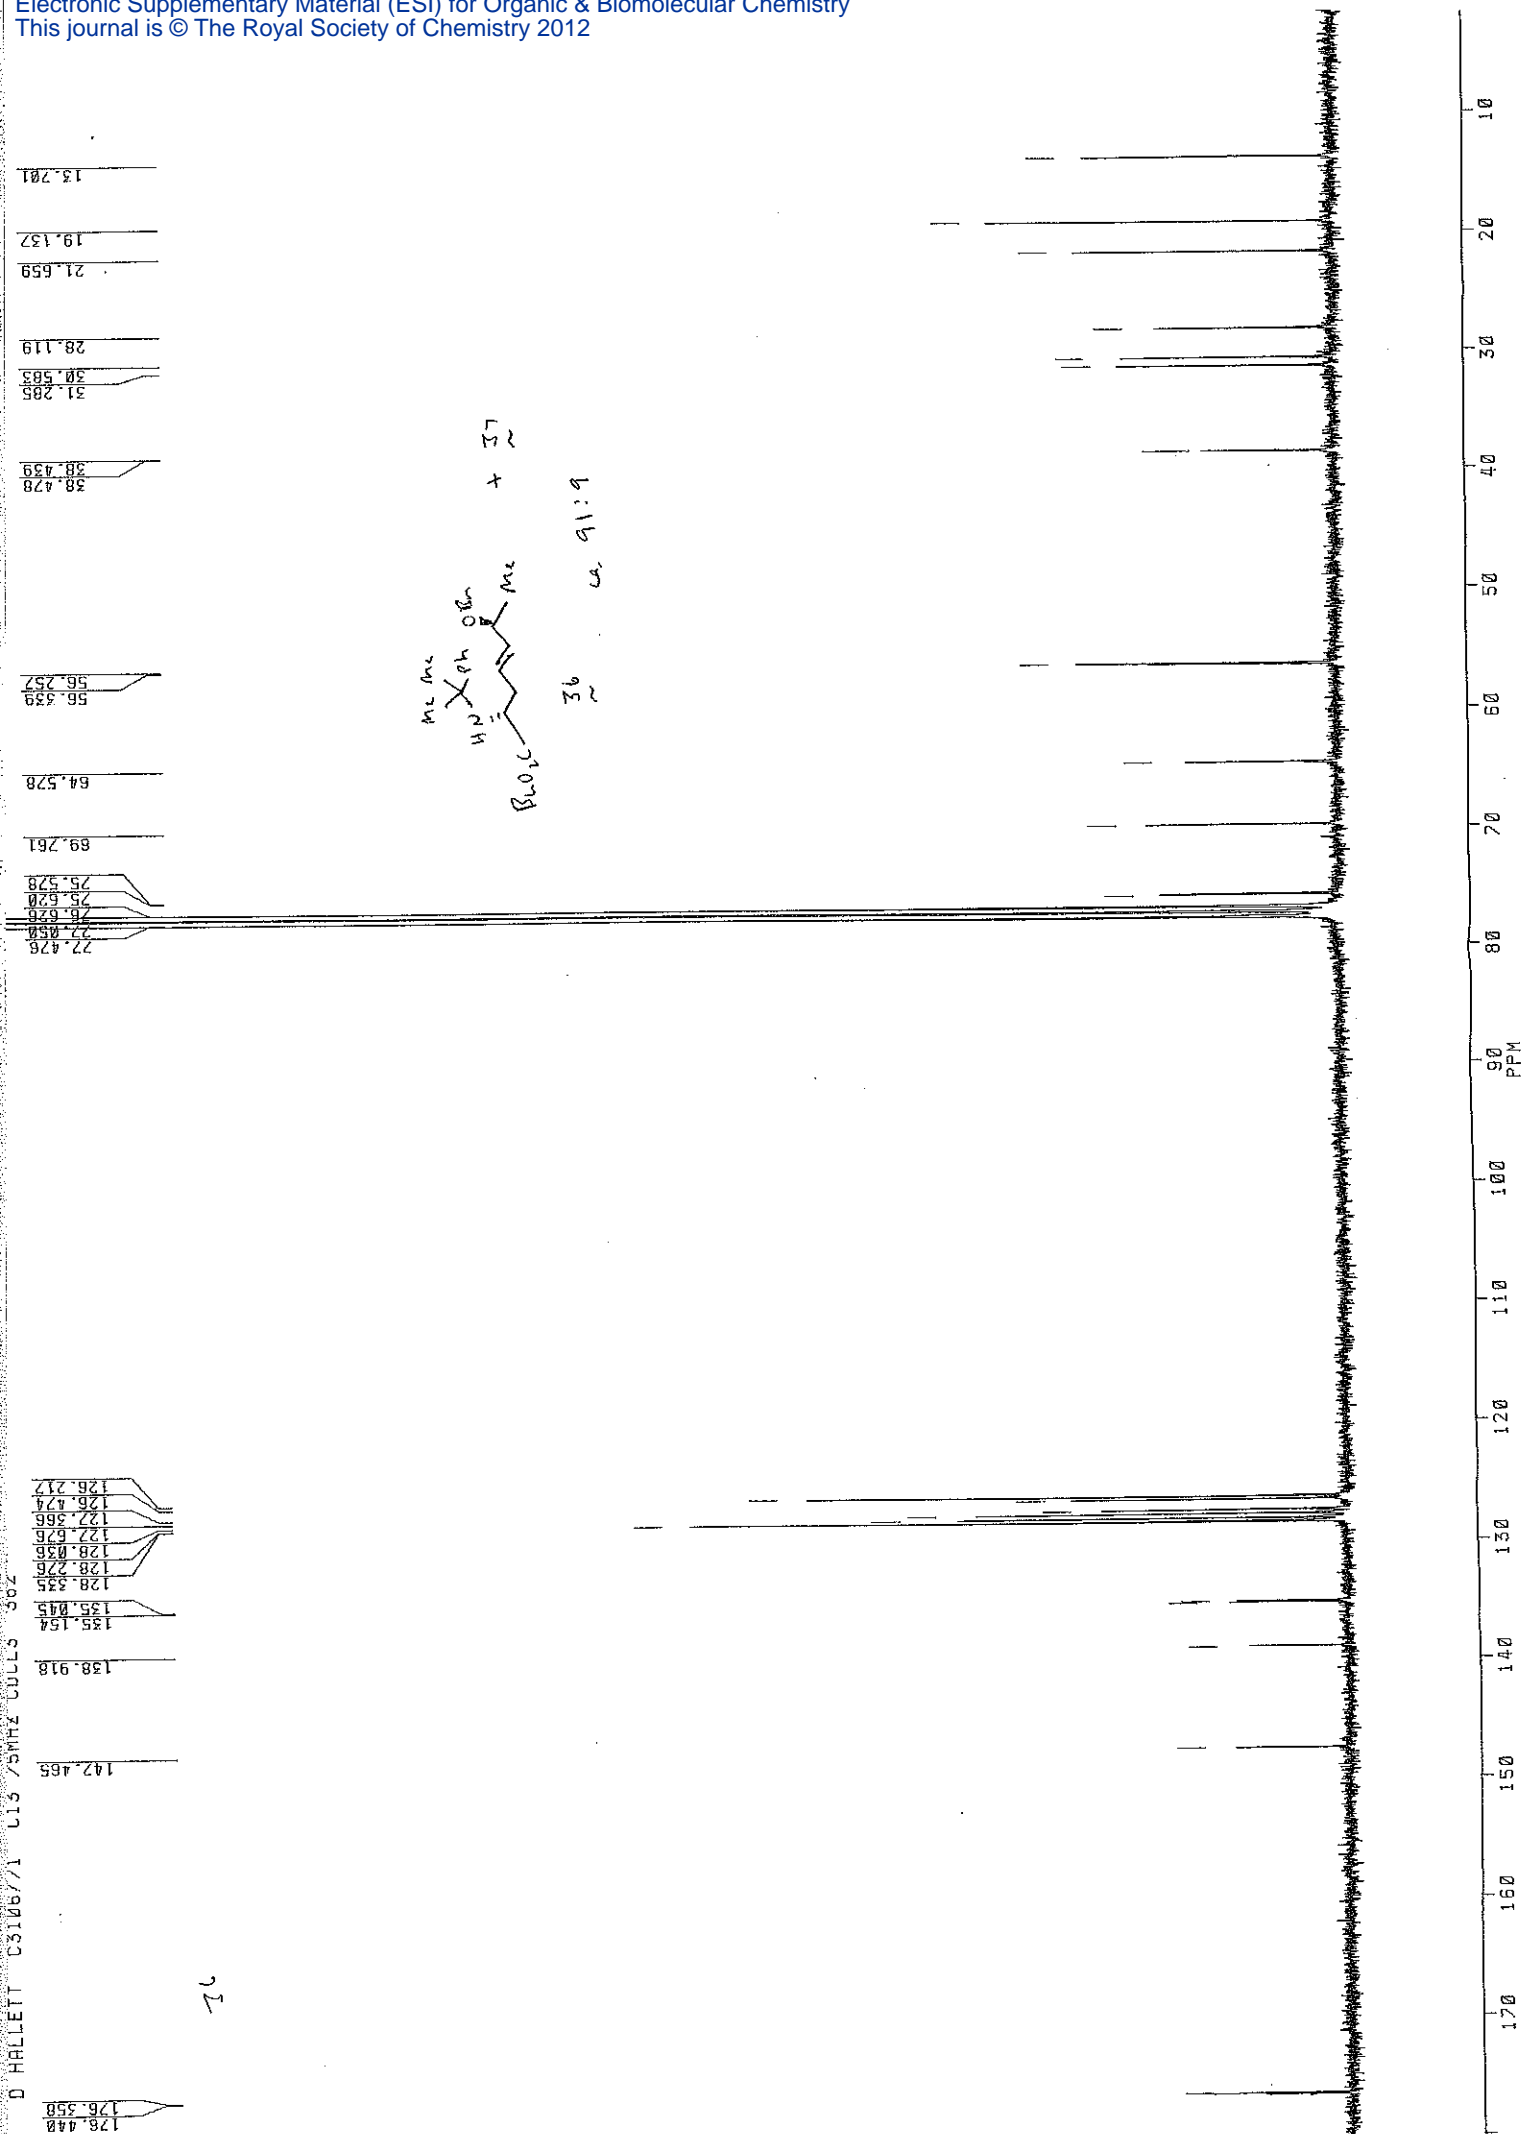

12

D HALLETT CS106/1 015 25MHz CULLS 502

PPM

D. Halliwell  
DJH 2/137  
cdc13  
958

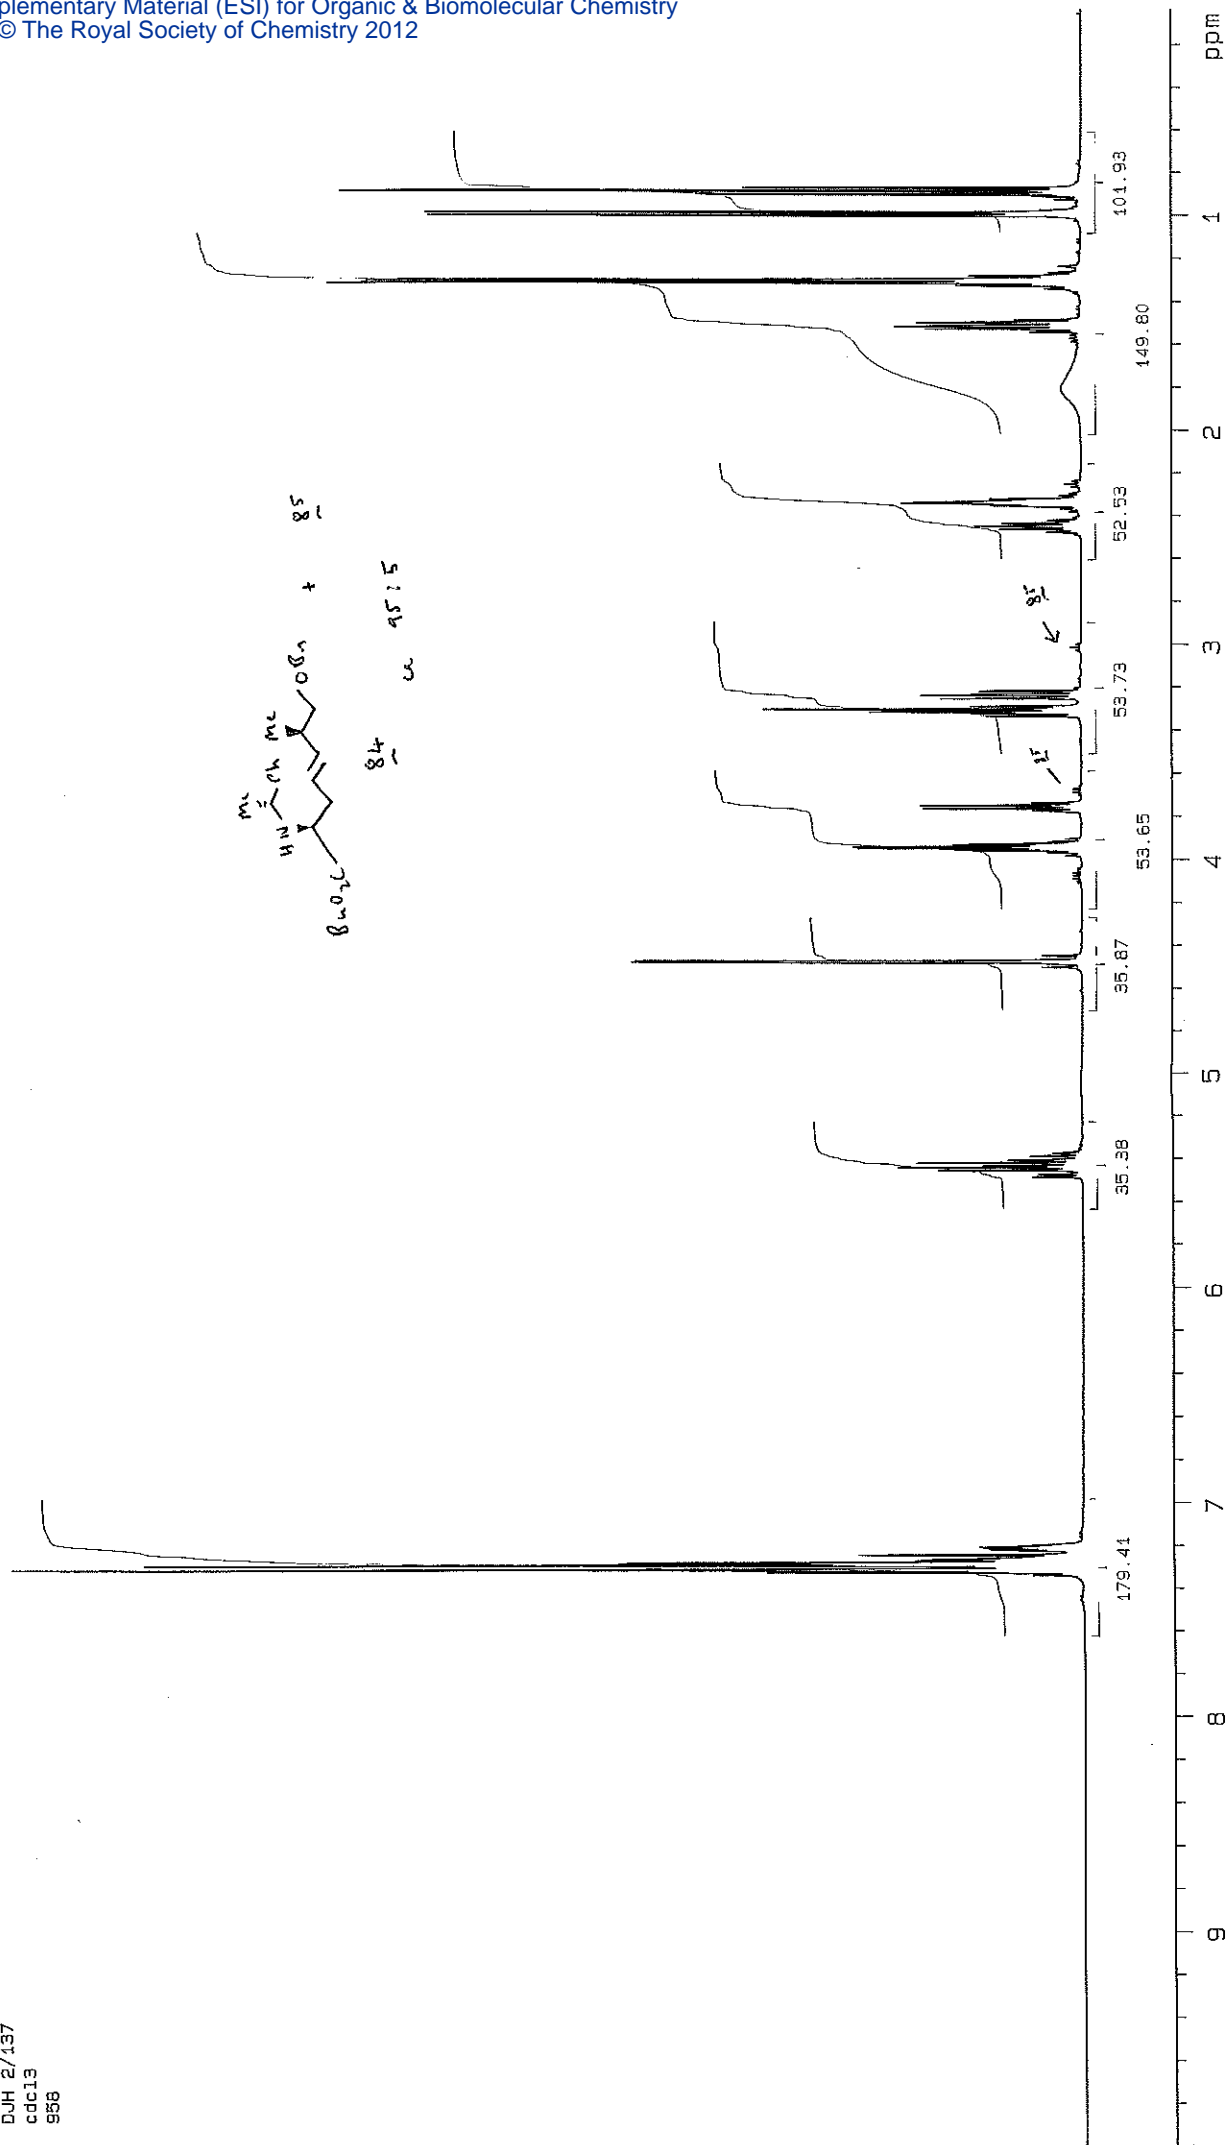

MS  
D1  
S0  
D  
PW  
RD  
AC  
RG  
NS  
OZ  
LB  
CT  
SR

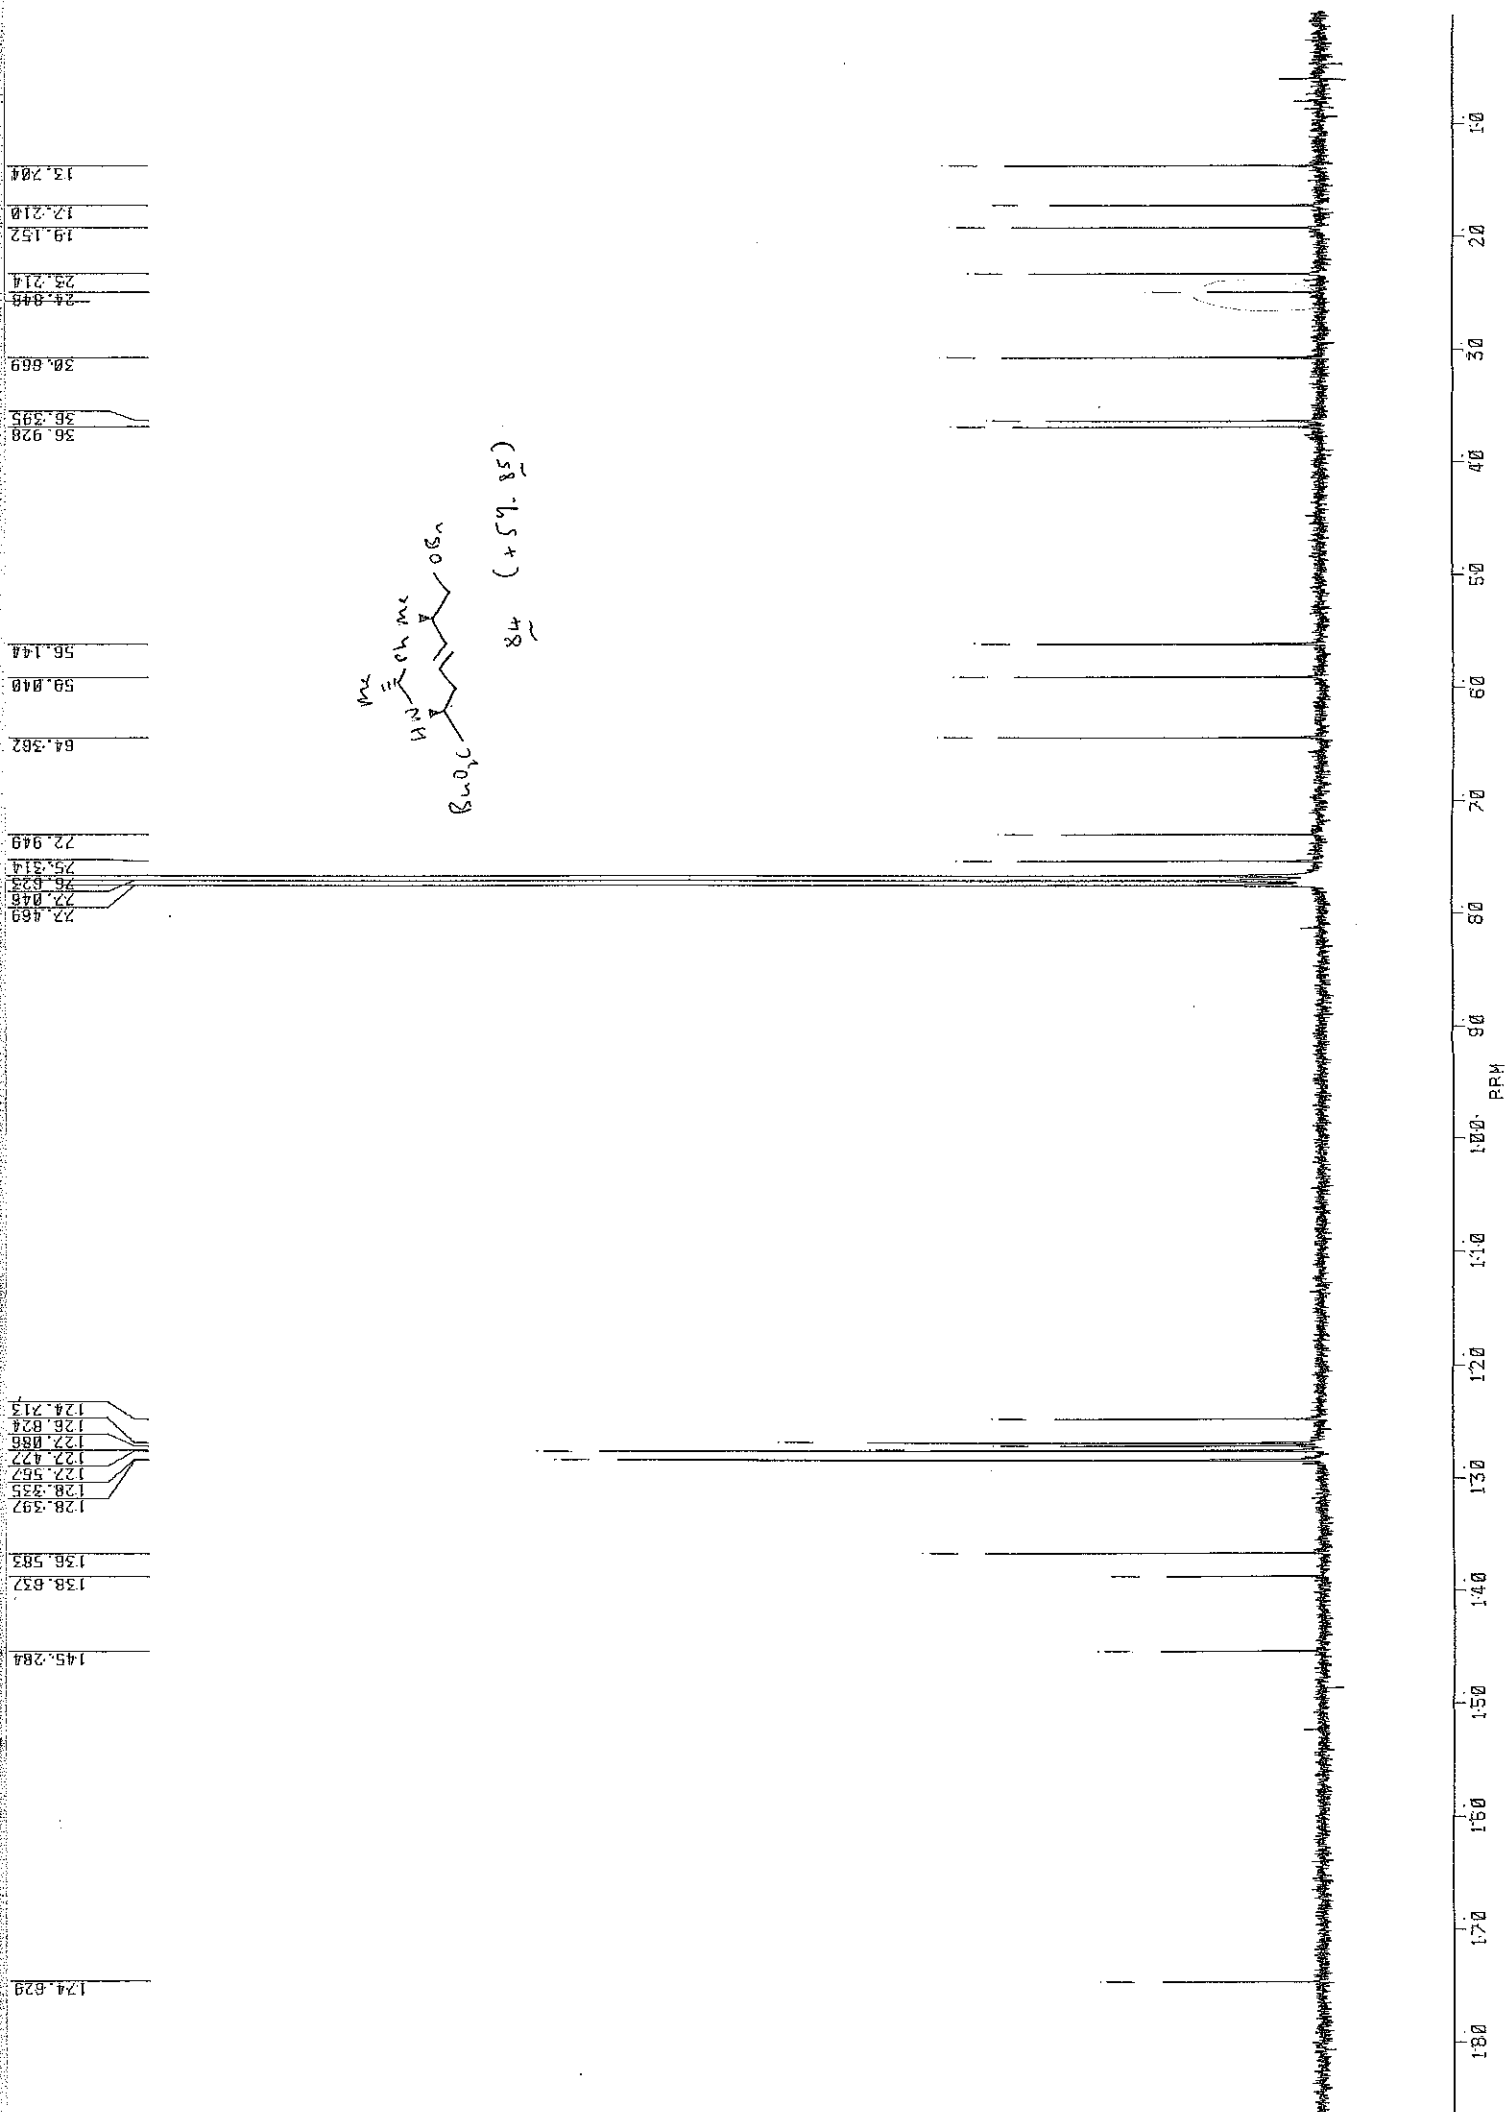



HNMPA  
BuO<sub>2</sub>C  
F

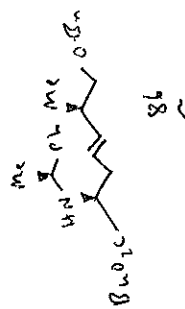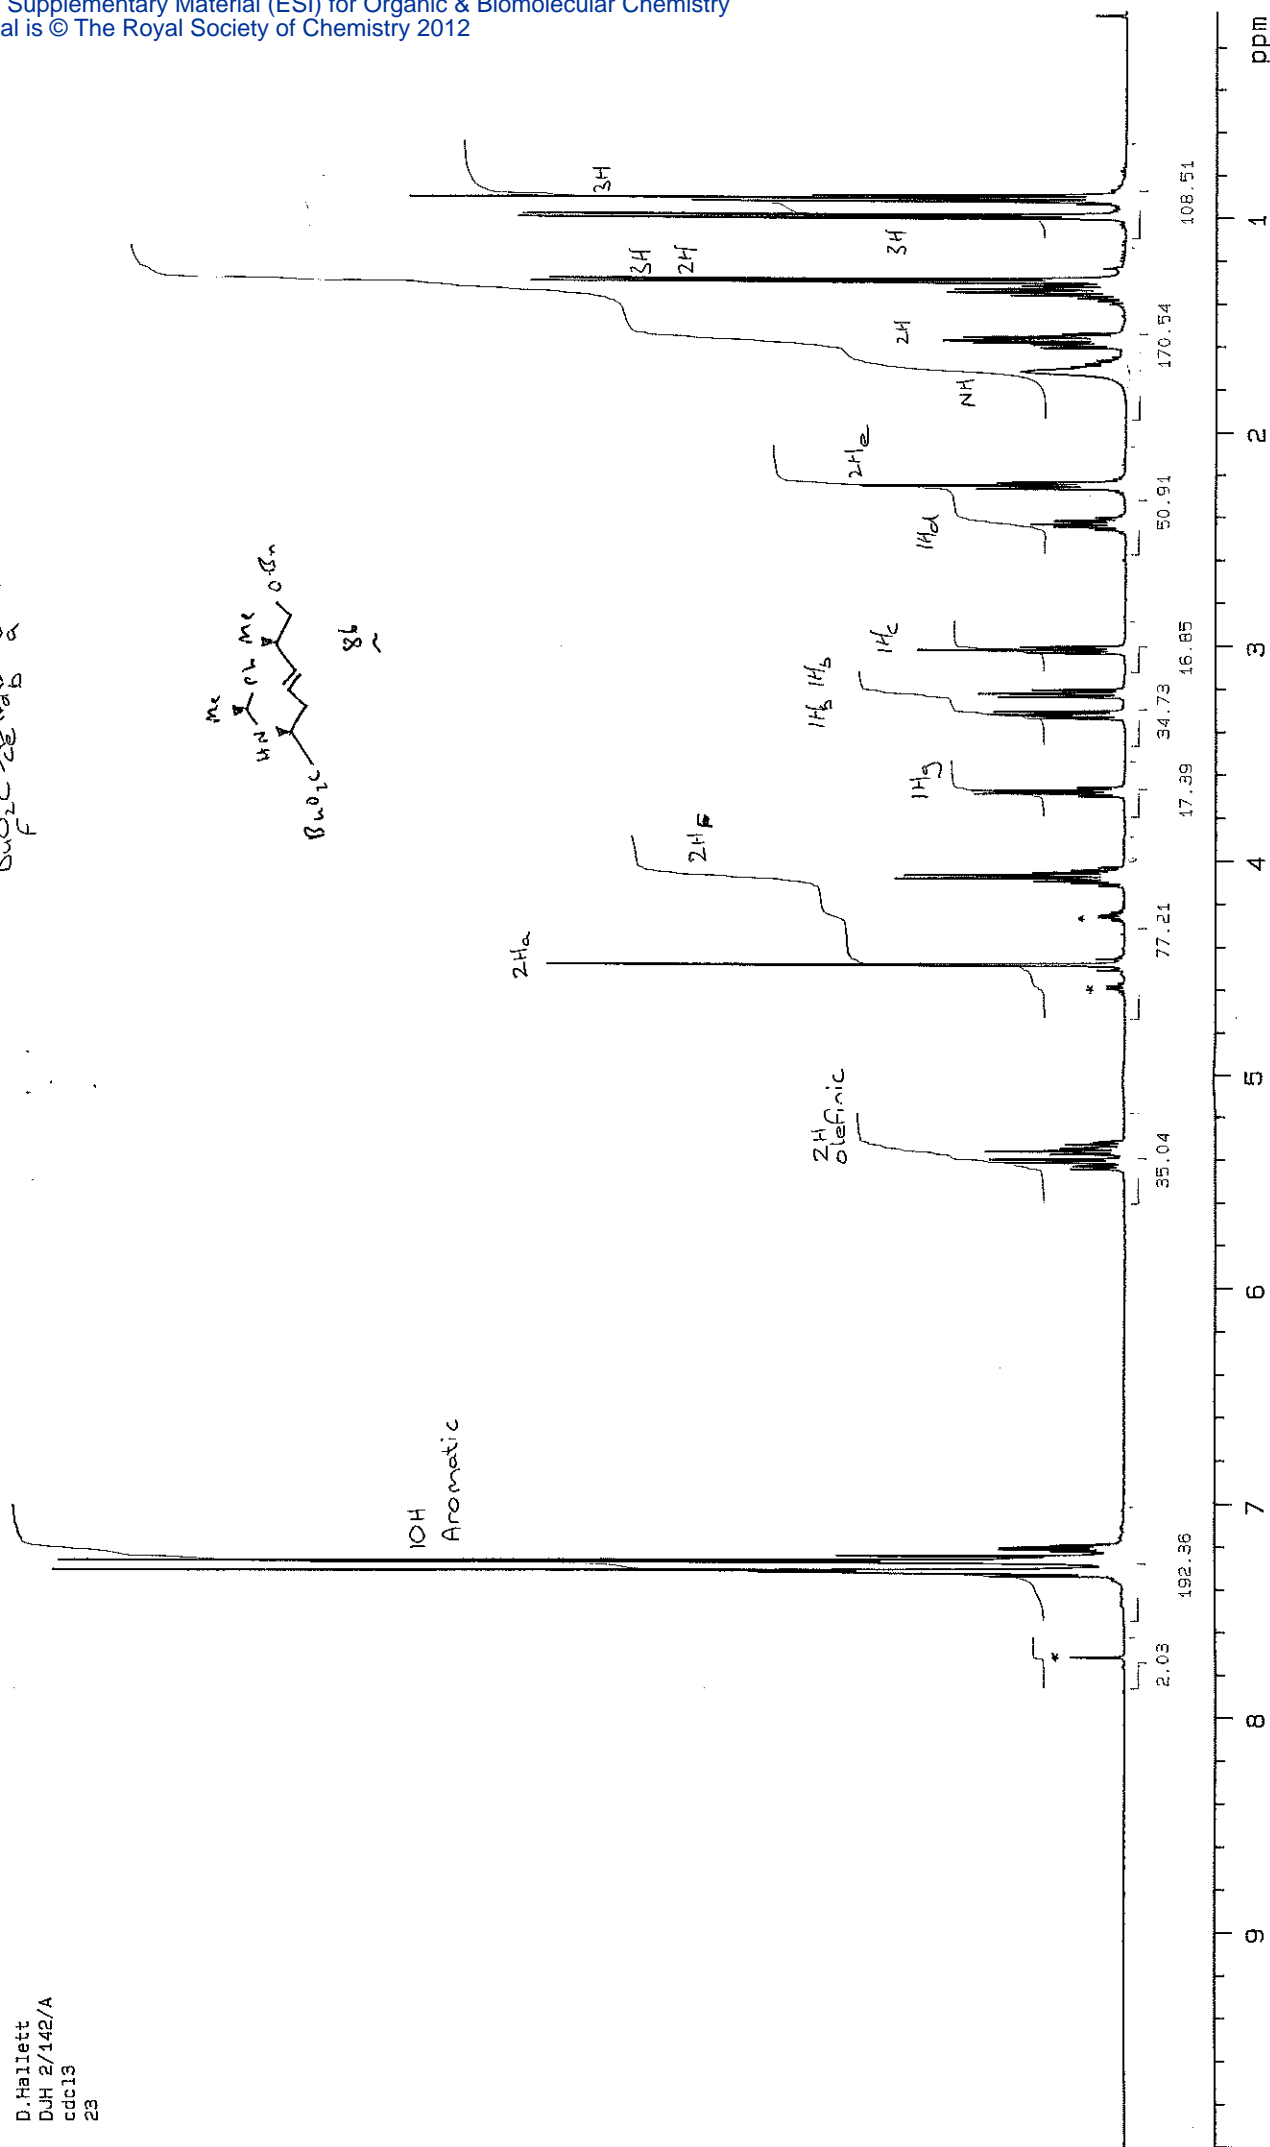

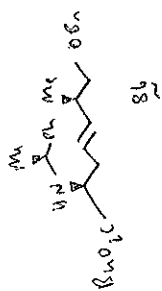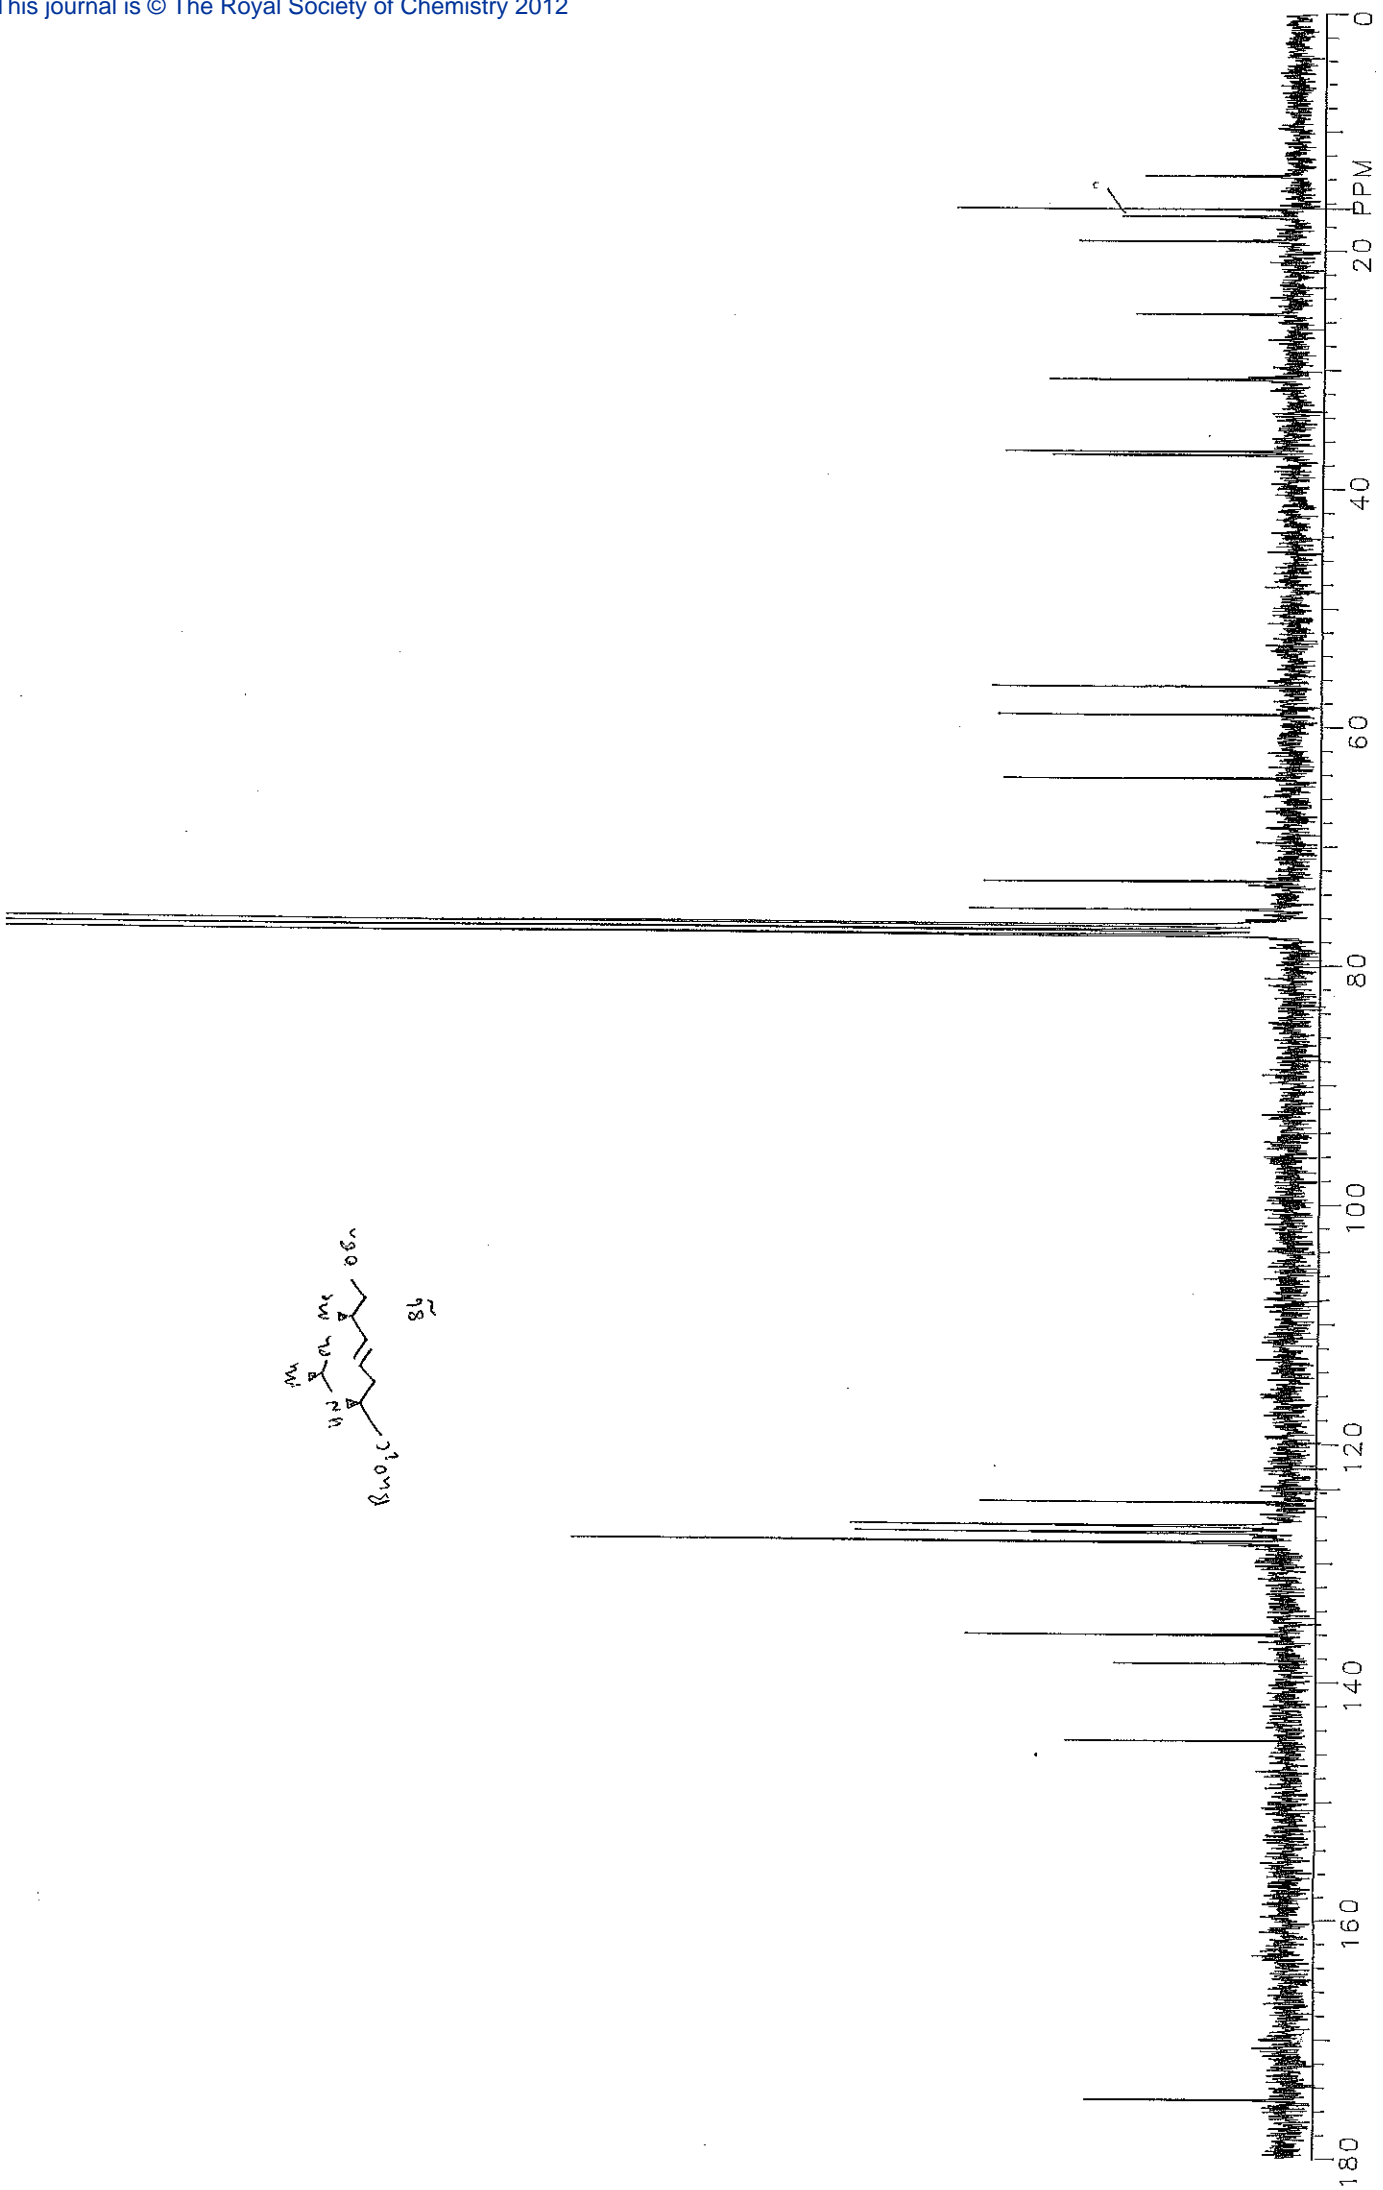

HFTDZ  
RUIOR  
S  
DATA  
SF  
DI  
SI  
TD  
SW  
PW  
RD  
AQ  
RG  
NS  
DZ  
DP  
LB  
CY  
SR

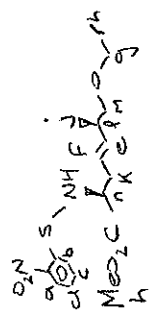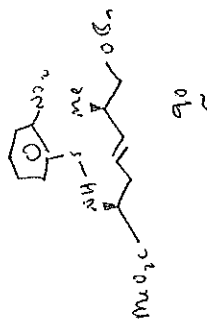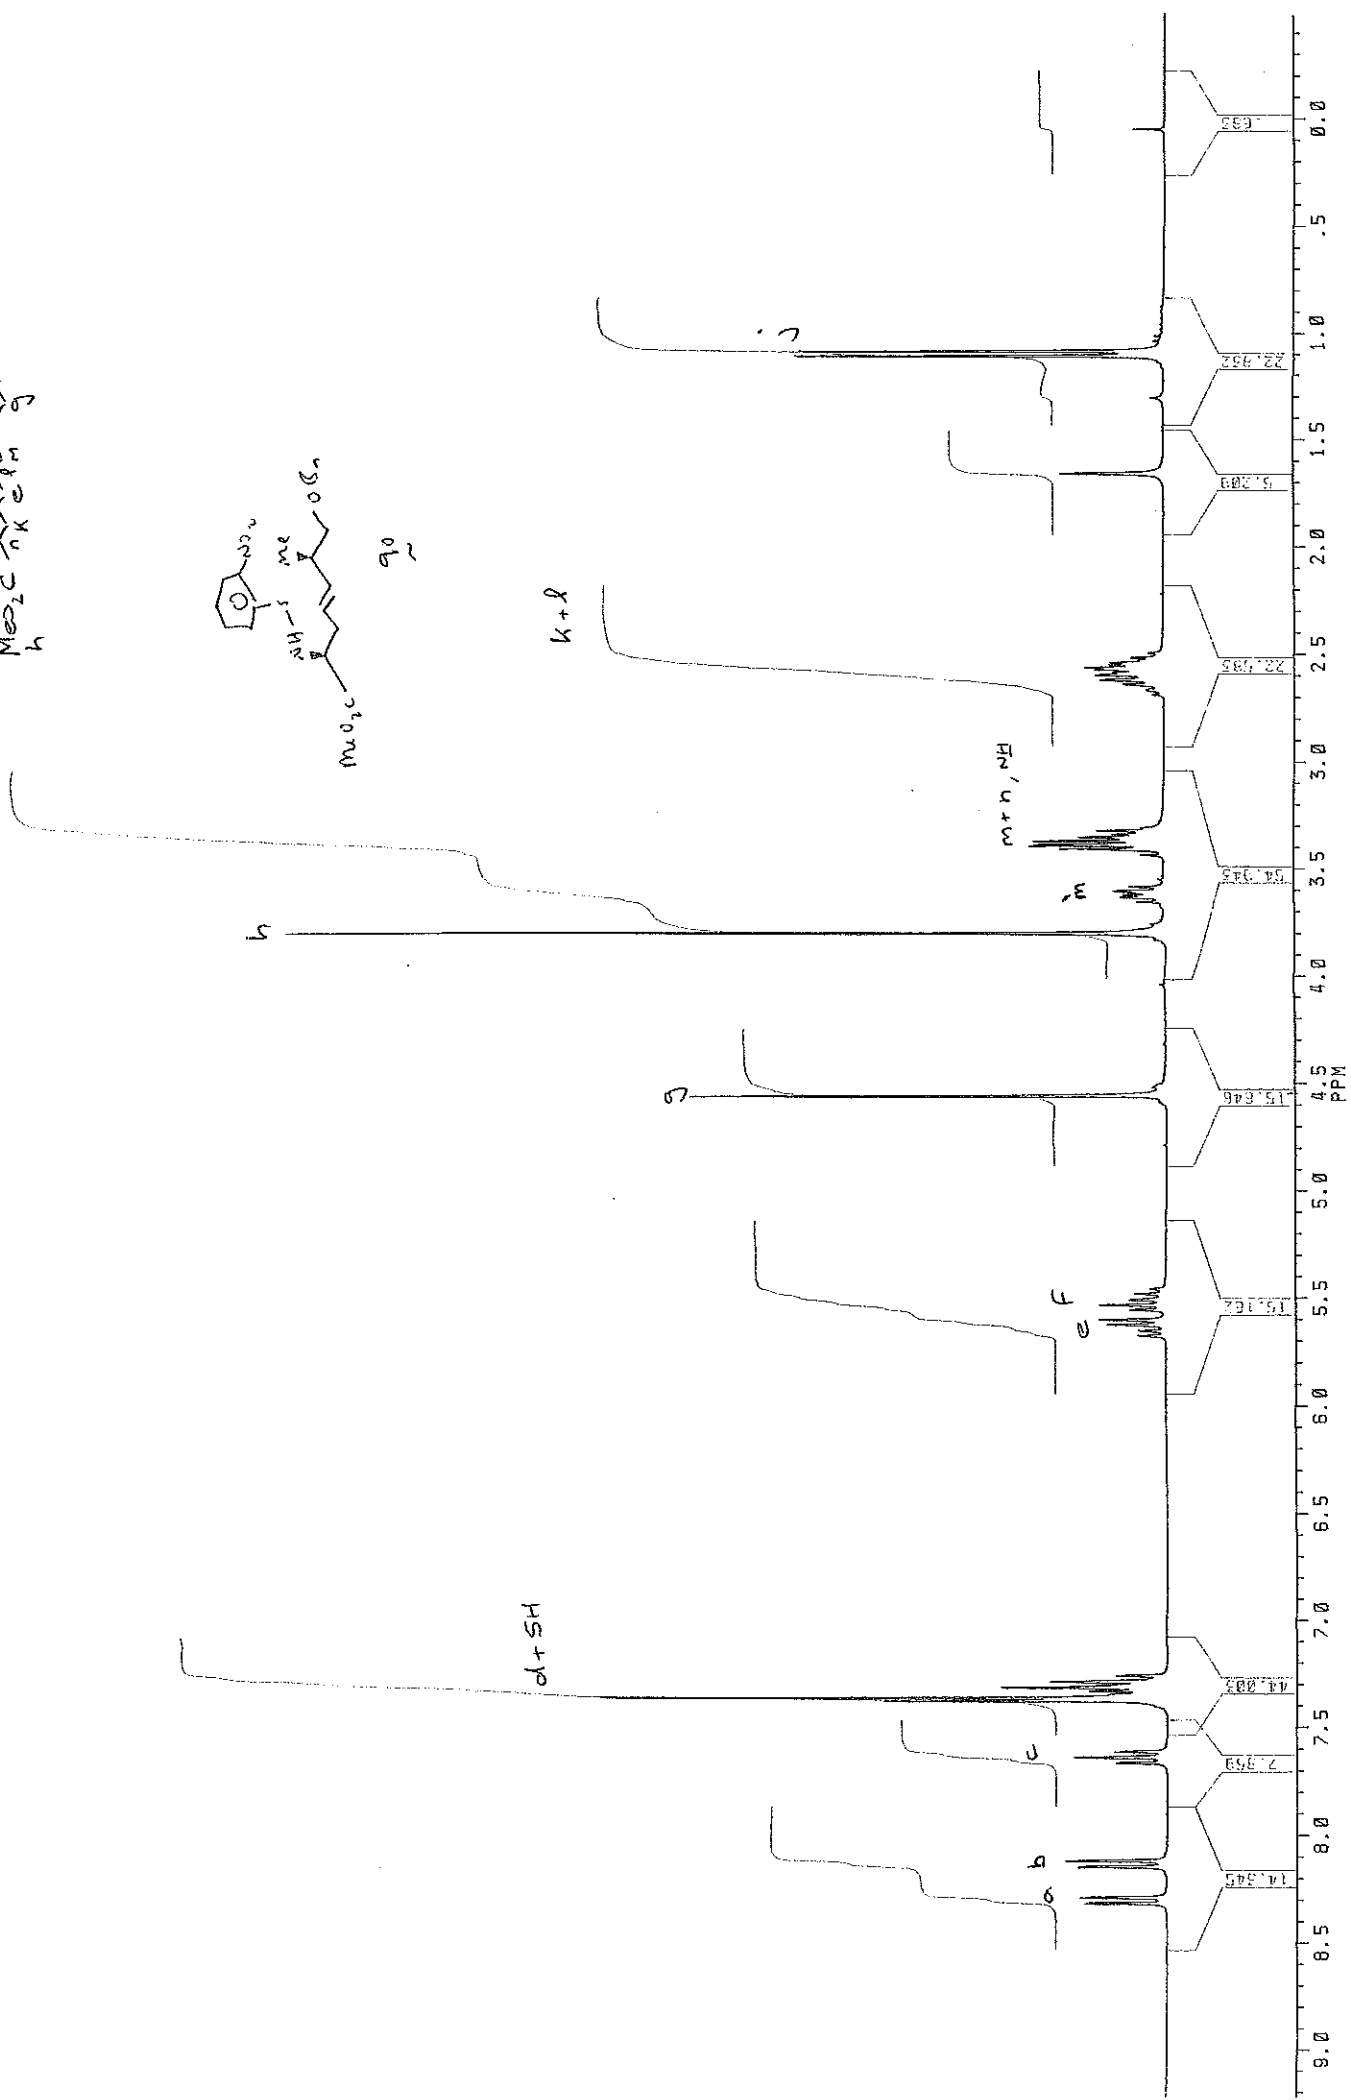

17.116  
17.035

37.038  
36.837

52.264

63.698

75.032

75.100

76.023

77.045

77.468

123.595

123.644

124.688

125.231

127.542

127.605

128.354

133.253

138.201

138.266

138.427

142.587

145.144

173.695

PPM

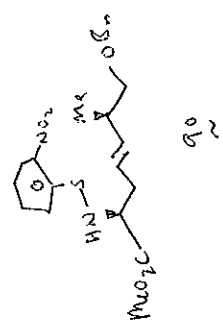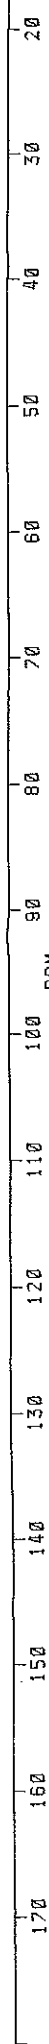

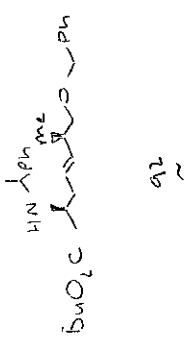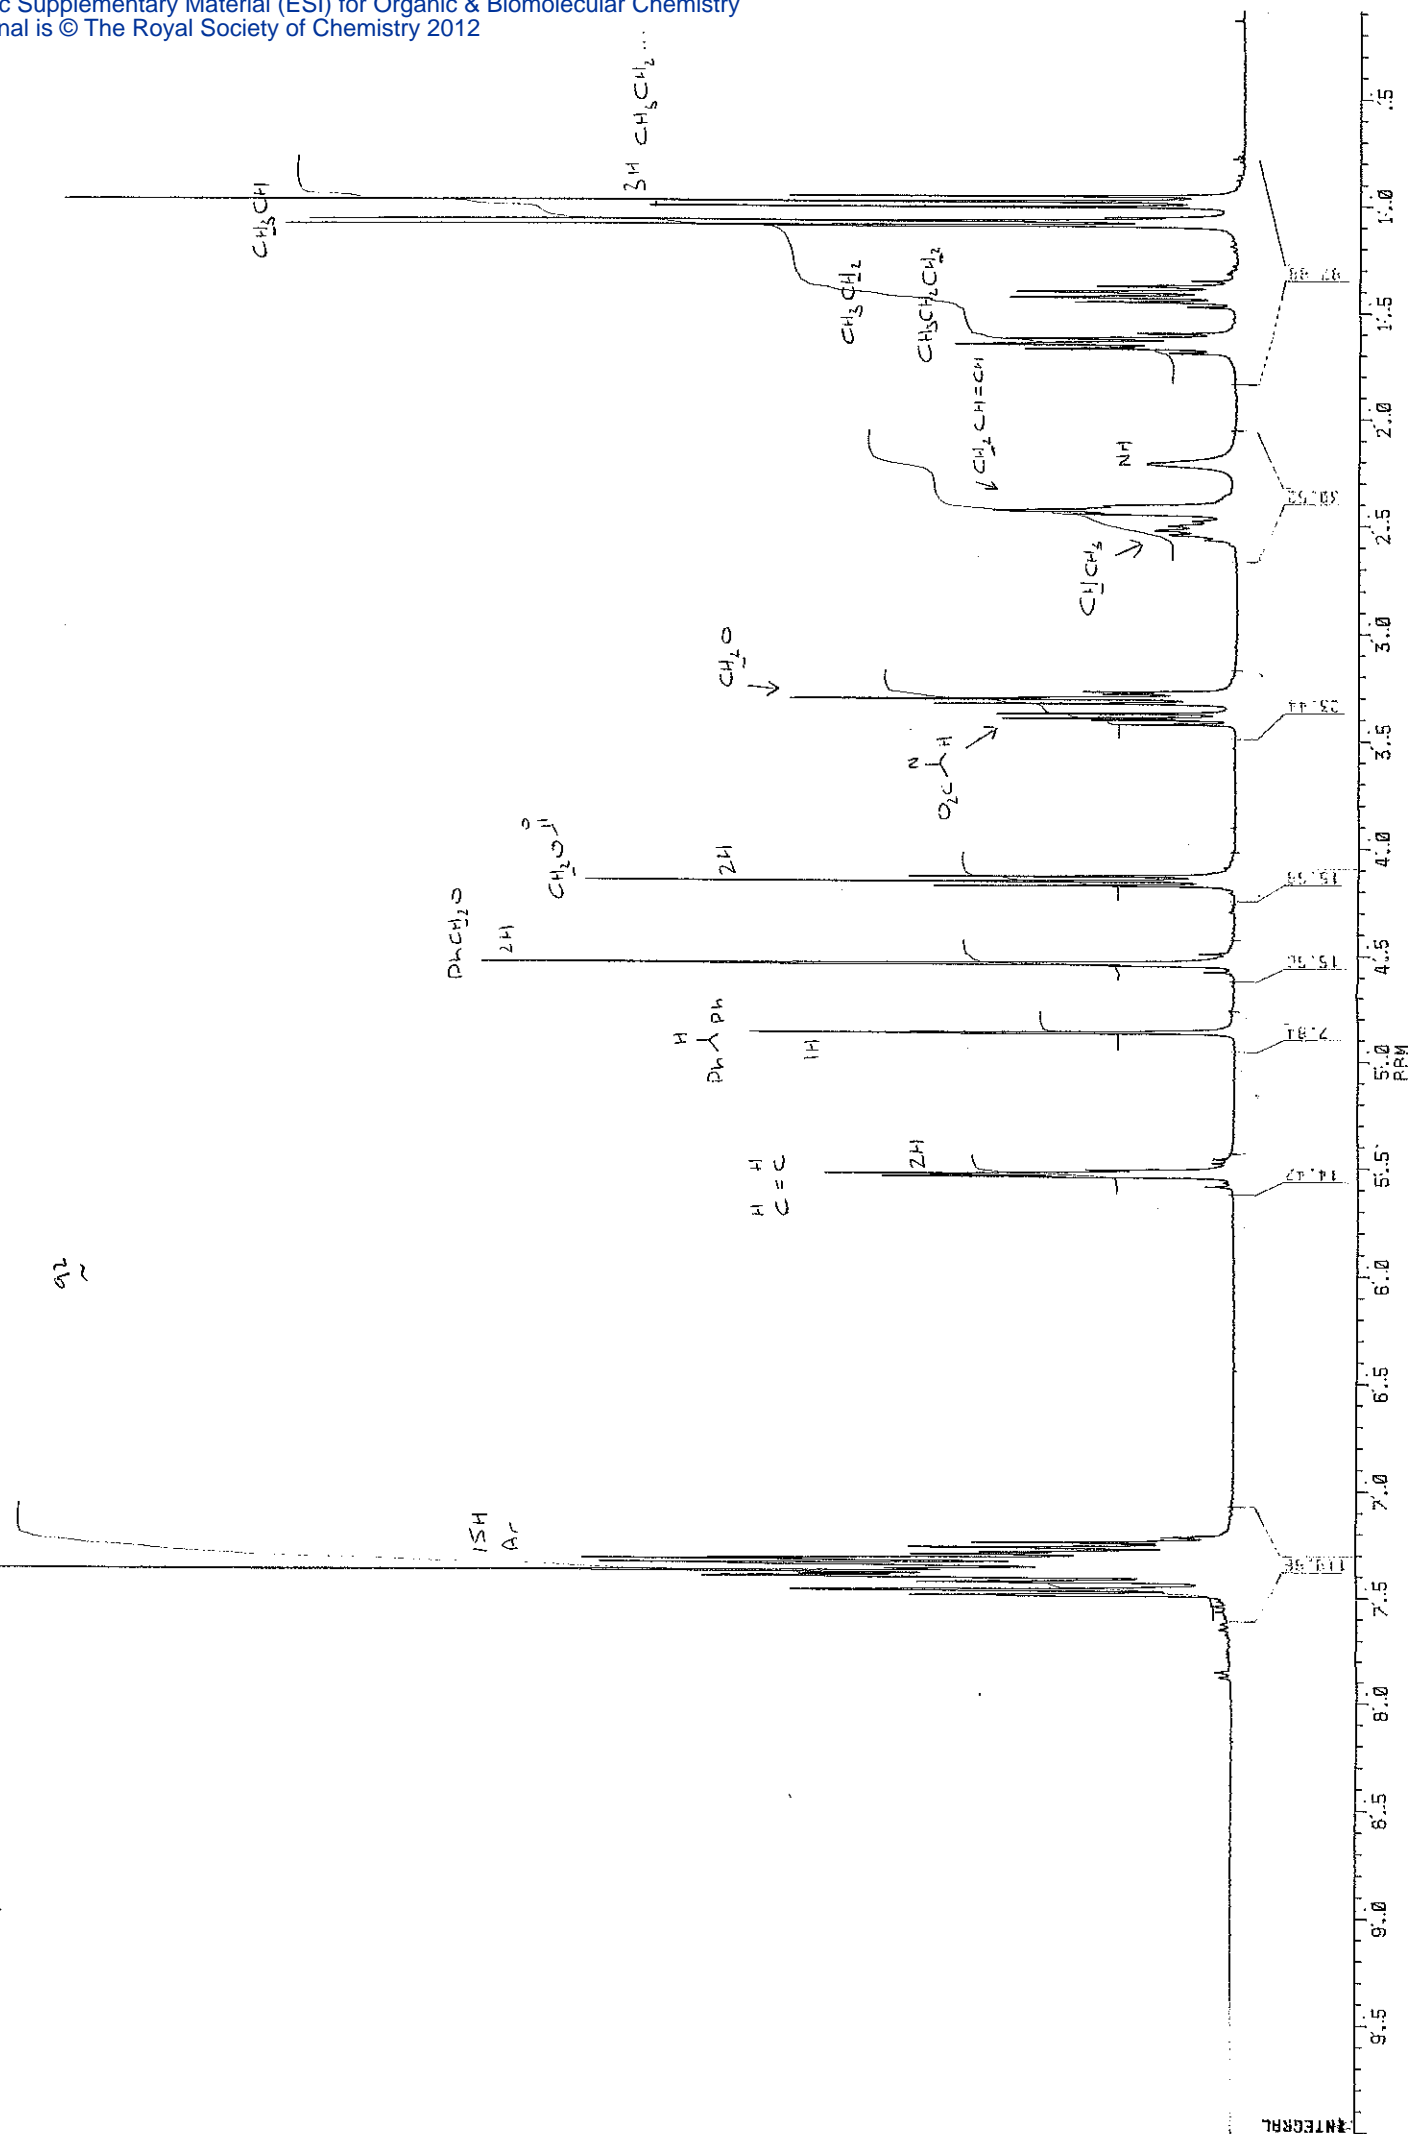

| Chemical Shift (PPM) | Assignment |
|----------------------|------------|
| 144.362              |            |
| 142.958              |            |
| 138.696              |            |
| 136.423              |            |
| 130.110              |            |
| 128.543              |            |
| 128.498              |            |
| 128.383              |            |
| 128.252              |            |
| 127.687              |            |
| 127.604              |            |
| 127.512              |            |
| 127.396              |            |
| 127.195              |            |
| 125.039              |            |
| 124.956              |            |
| 77.561               |            |
| 77.130               |            |
| 76.134               |            |
| 75.348               |            |
| 72.985               |            |
| 65.416               |            |
| 64.445               |            |
| 59.327               |            |
| 59.262               |            |
| 37.038               |            |
| 36.978               |            |
| 36.929               |            |
| 30.815               |            |
| 19.220               |            |
| 17.258               |            |
| 17.200               |            |
| 13.260               |            |

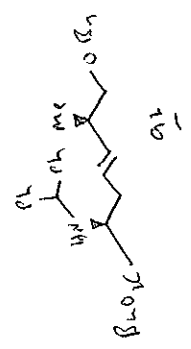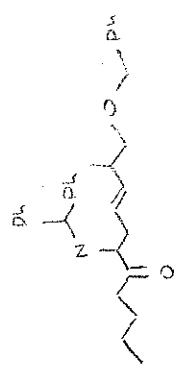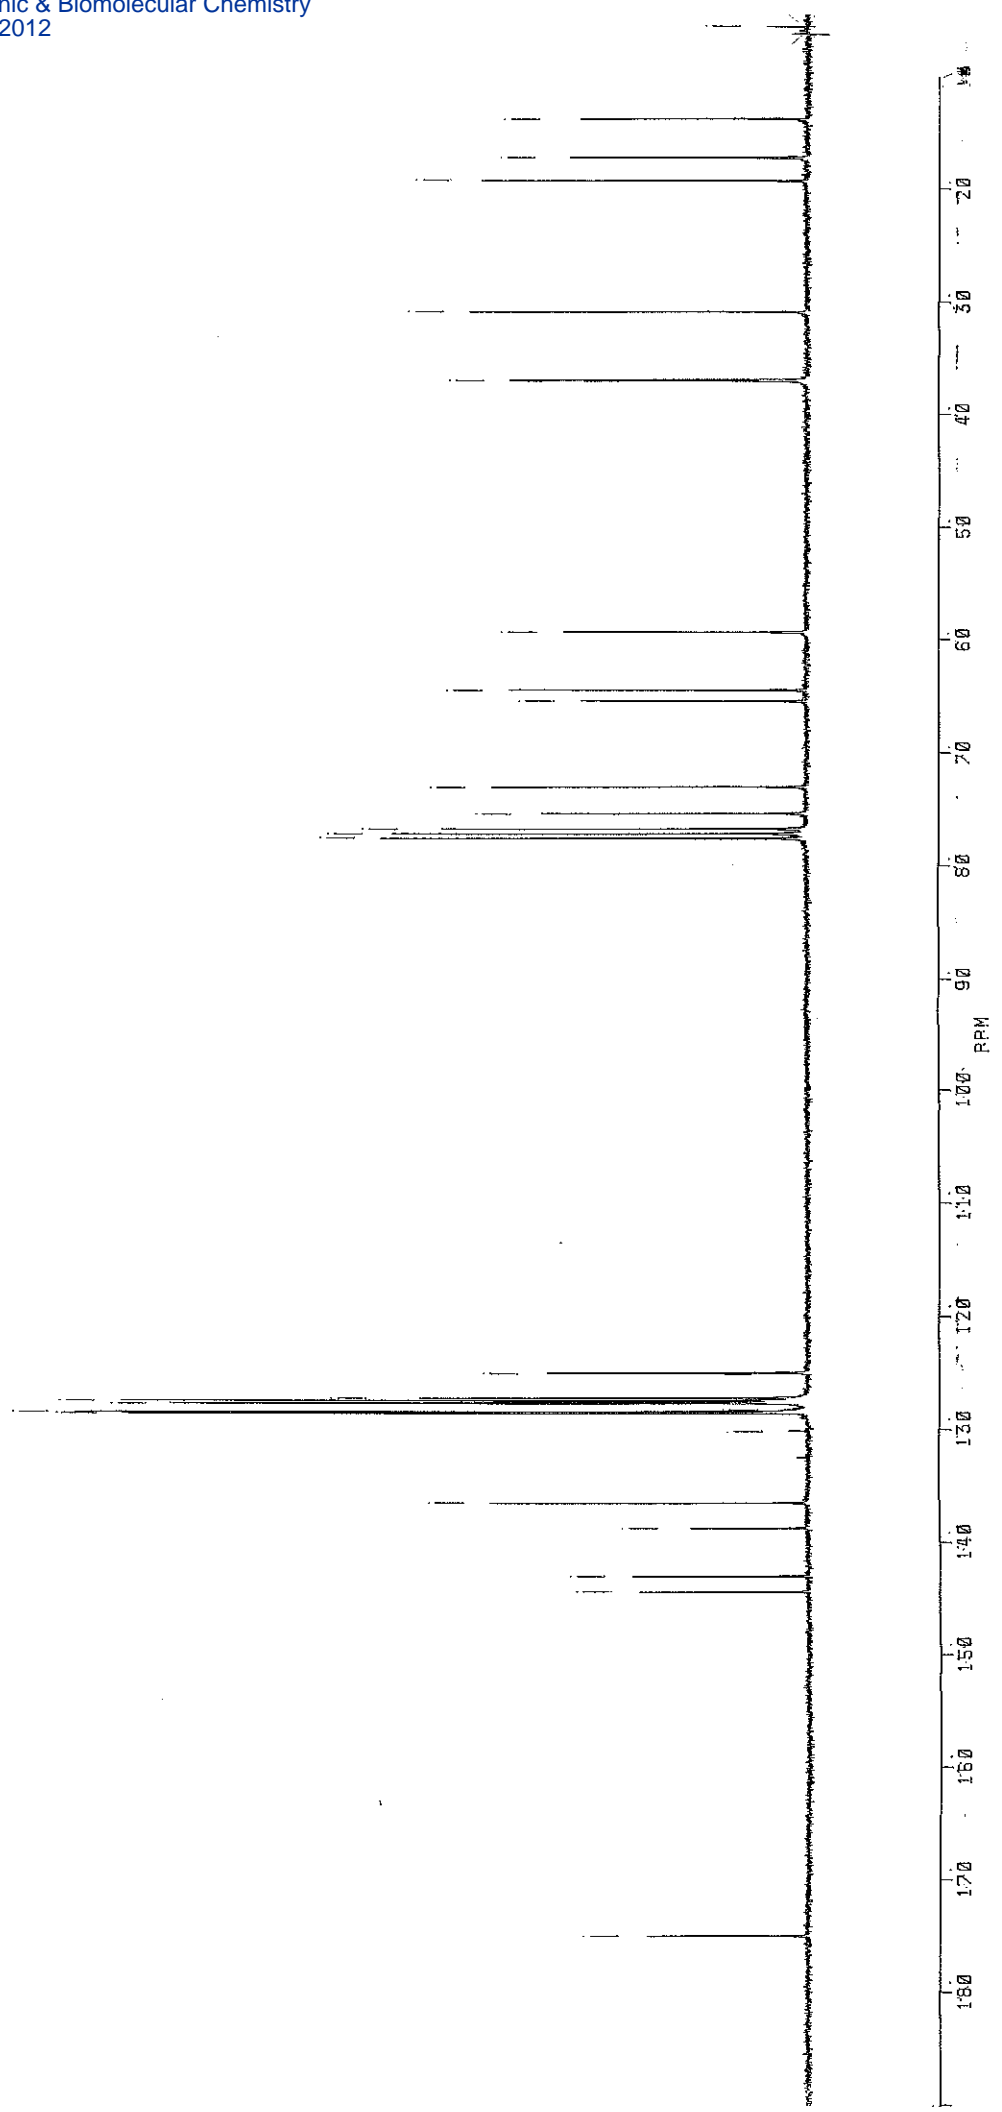

S13 SUPPLEMENTARY FIGURE 1

PPM

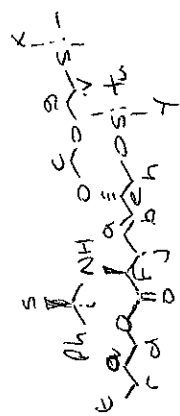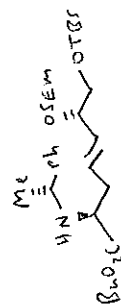

t+n

v,x,y

SPH<sub>2</sub>

g,h,i

d

f

h

j

q

r+s

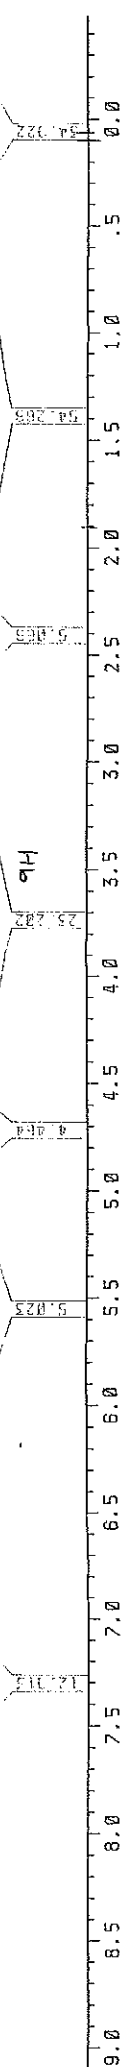

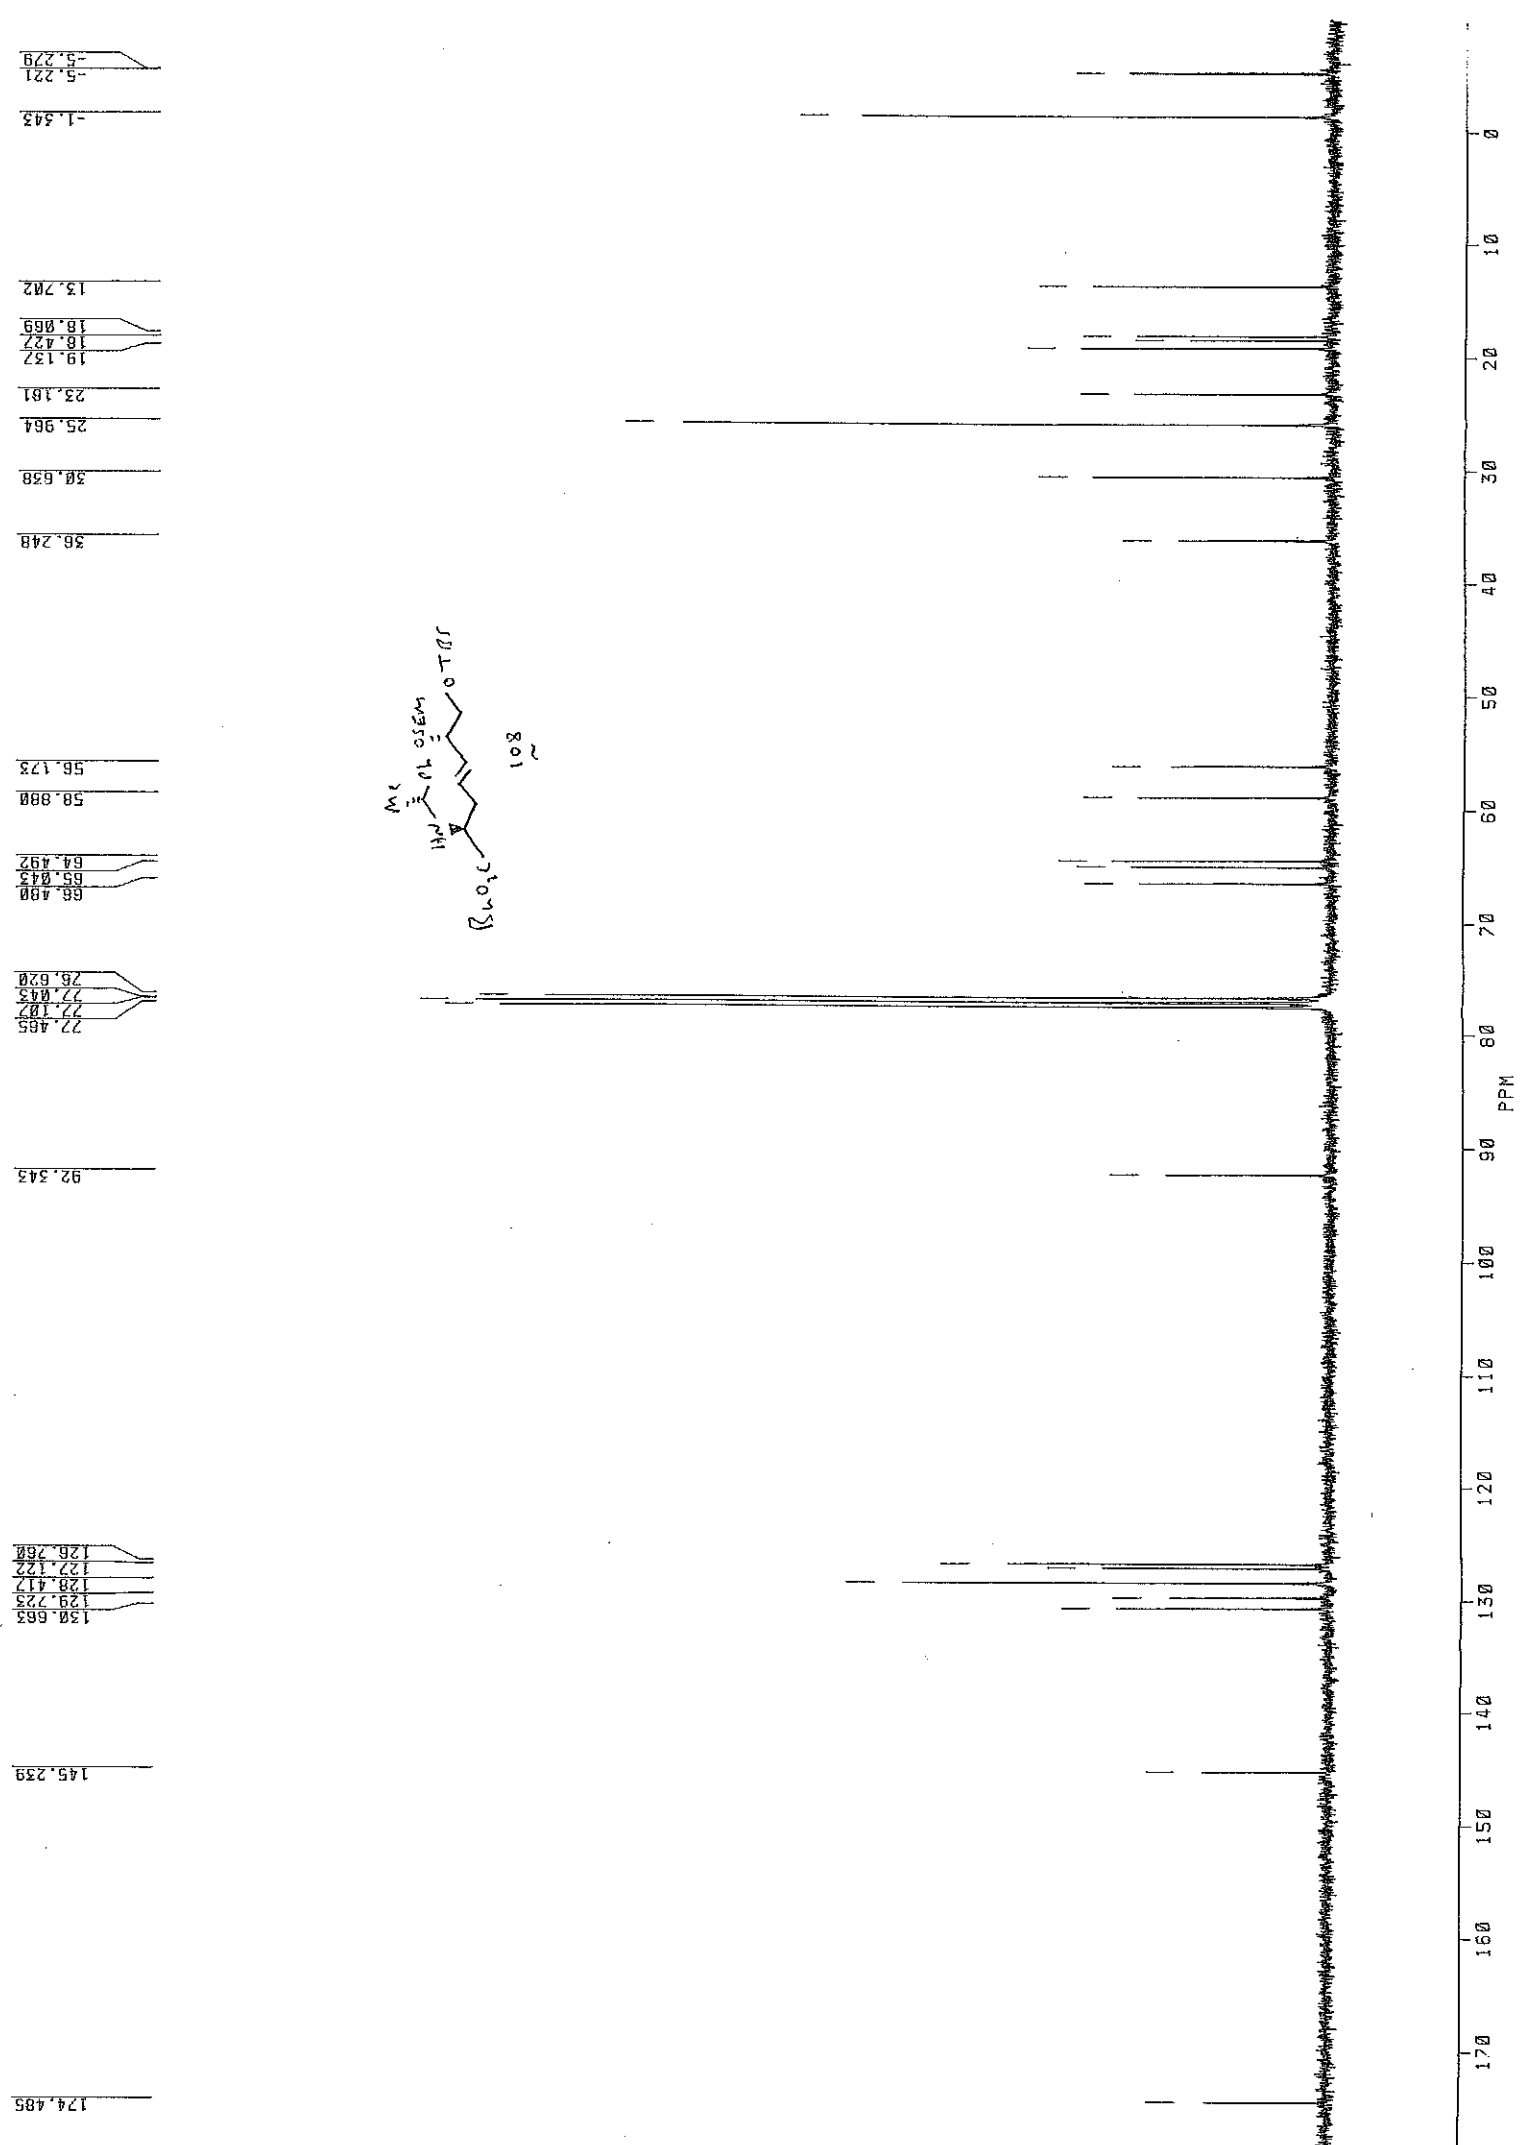



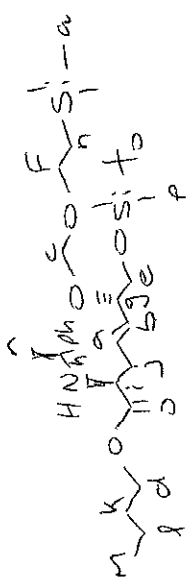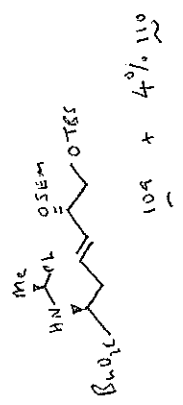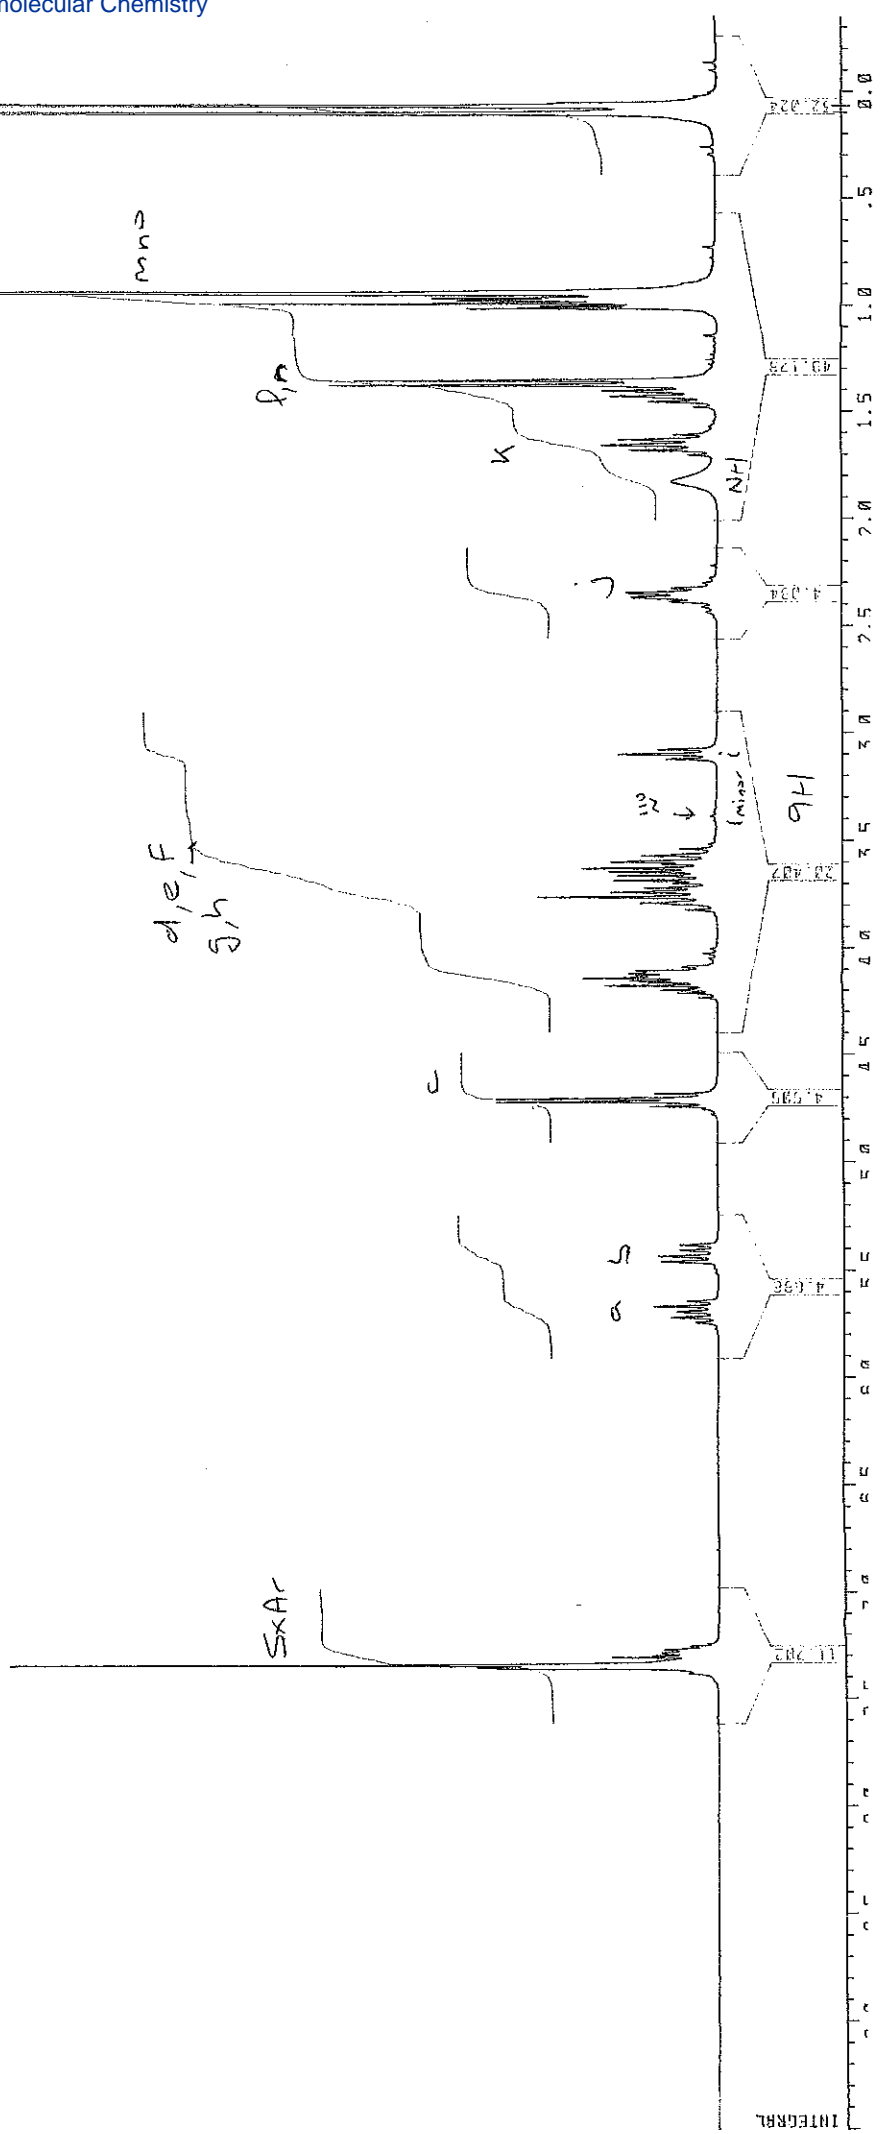

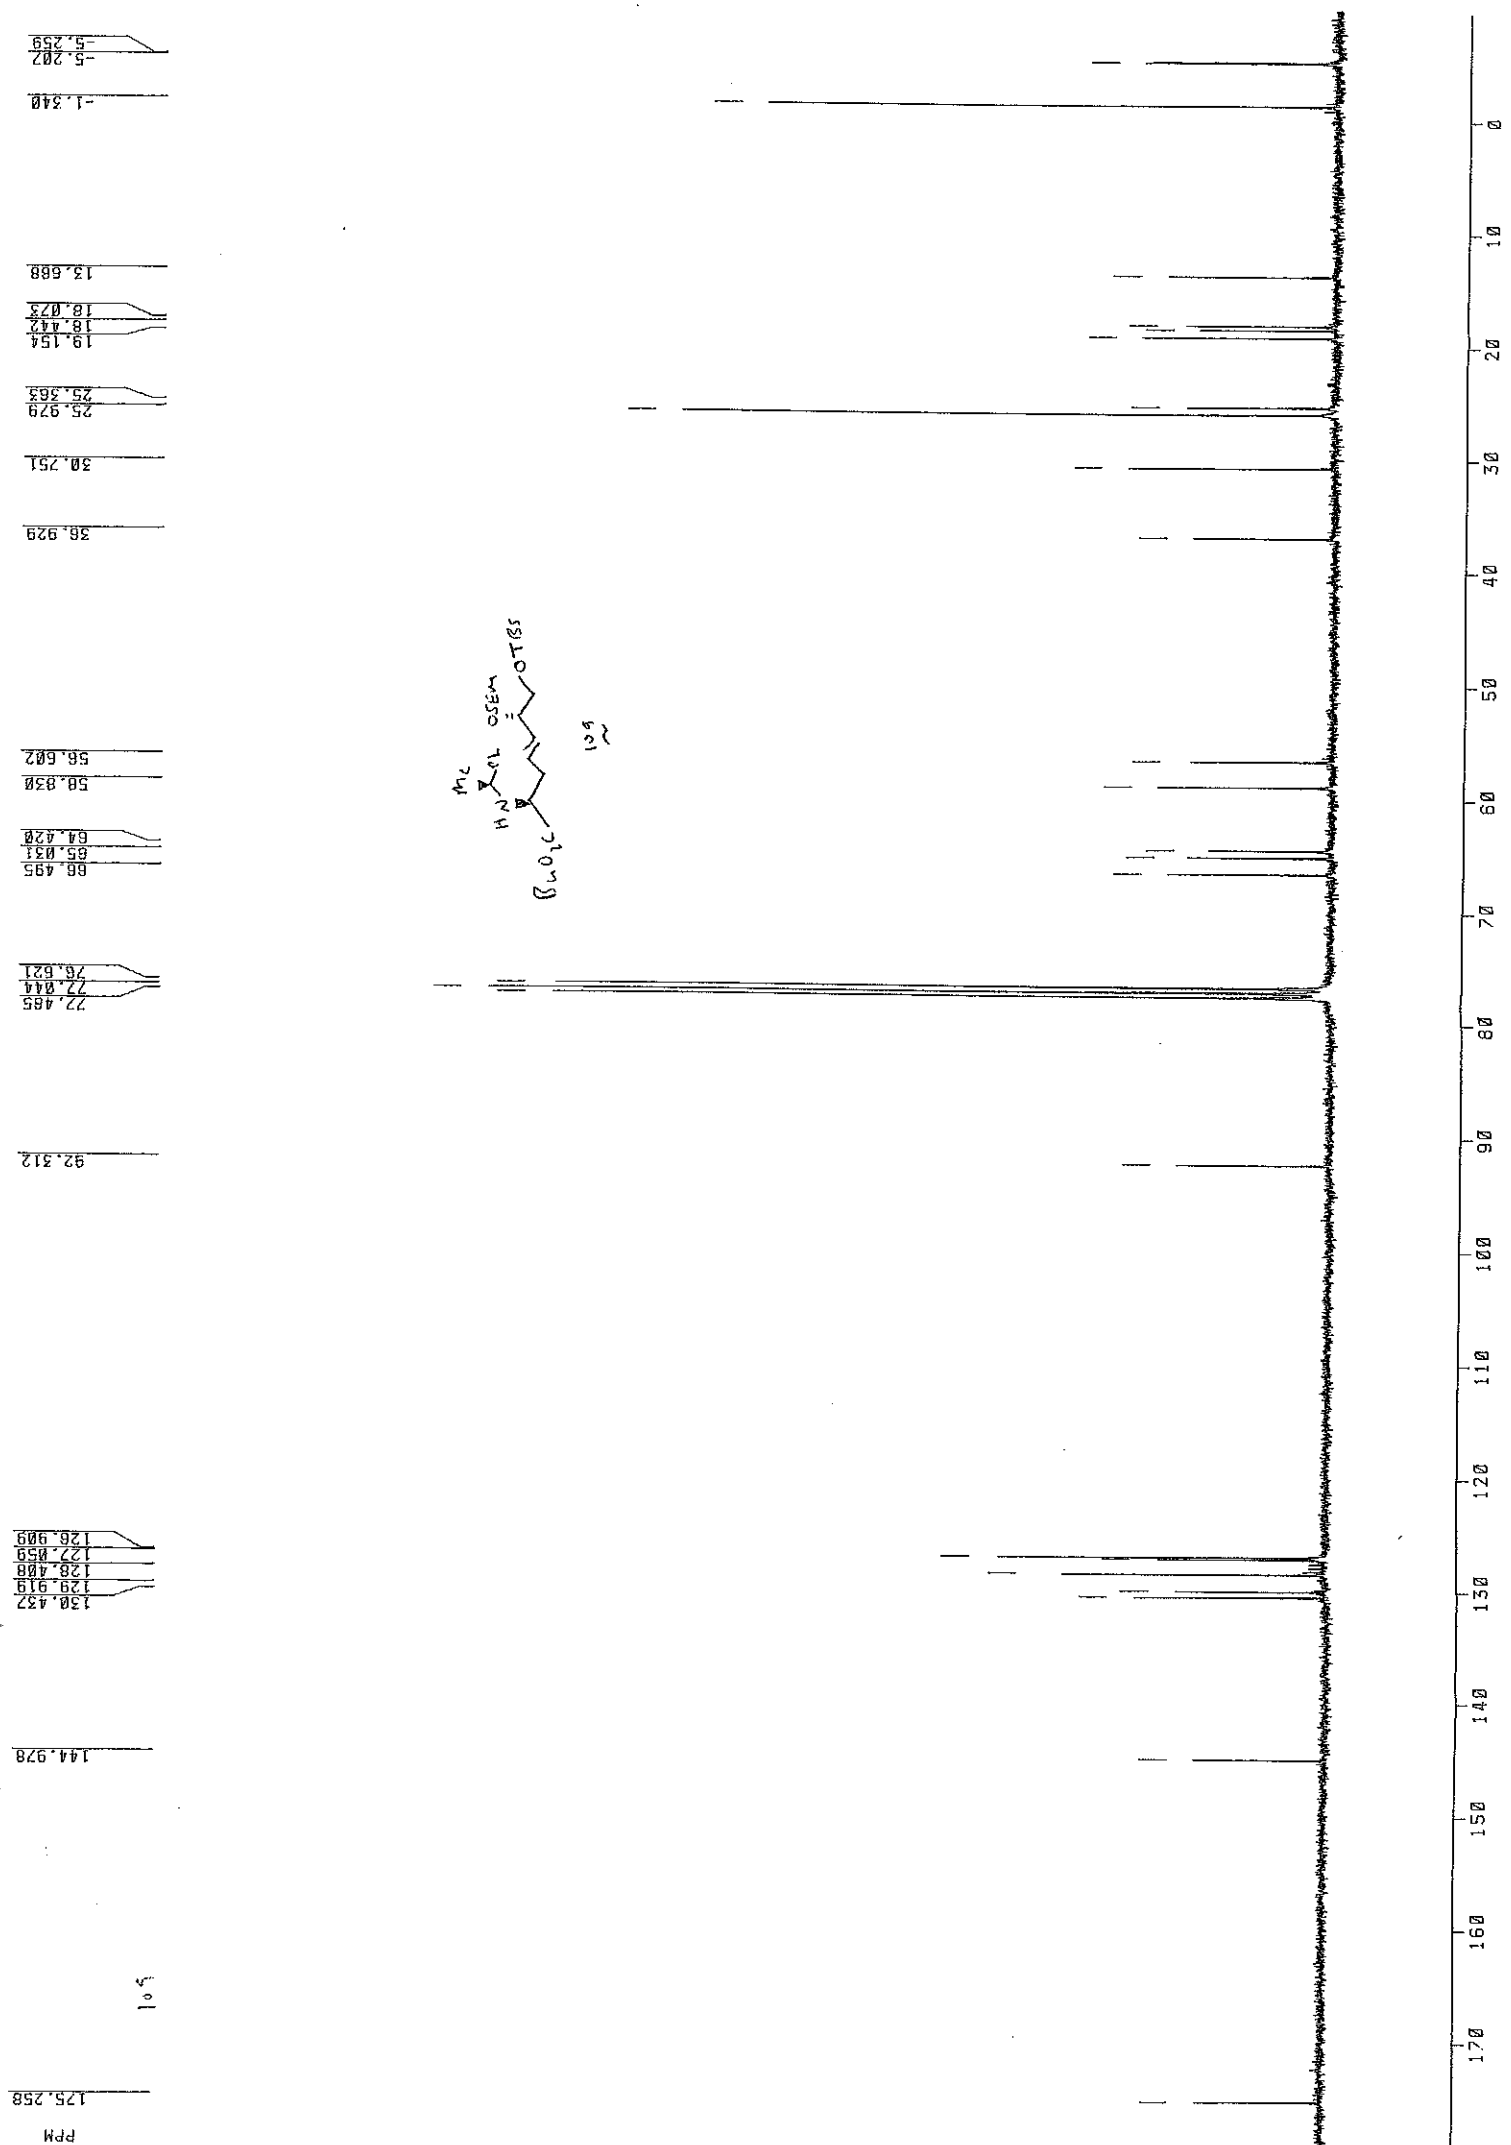

S01

HF  
RU  
SF  
OT  
SI  
TD  
SW  
RW  
RD  
RC  
MS  
OZ  
DP  
LB  
CY  
SR

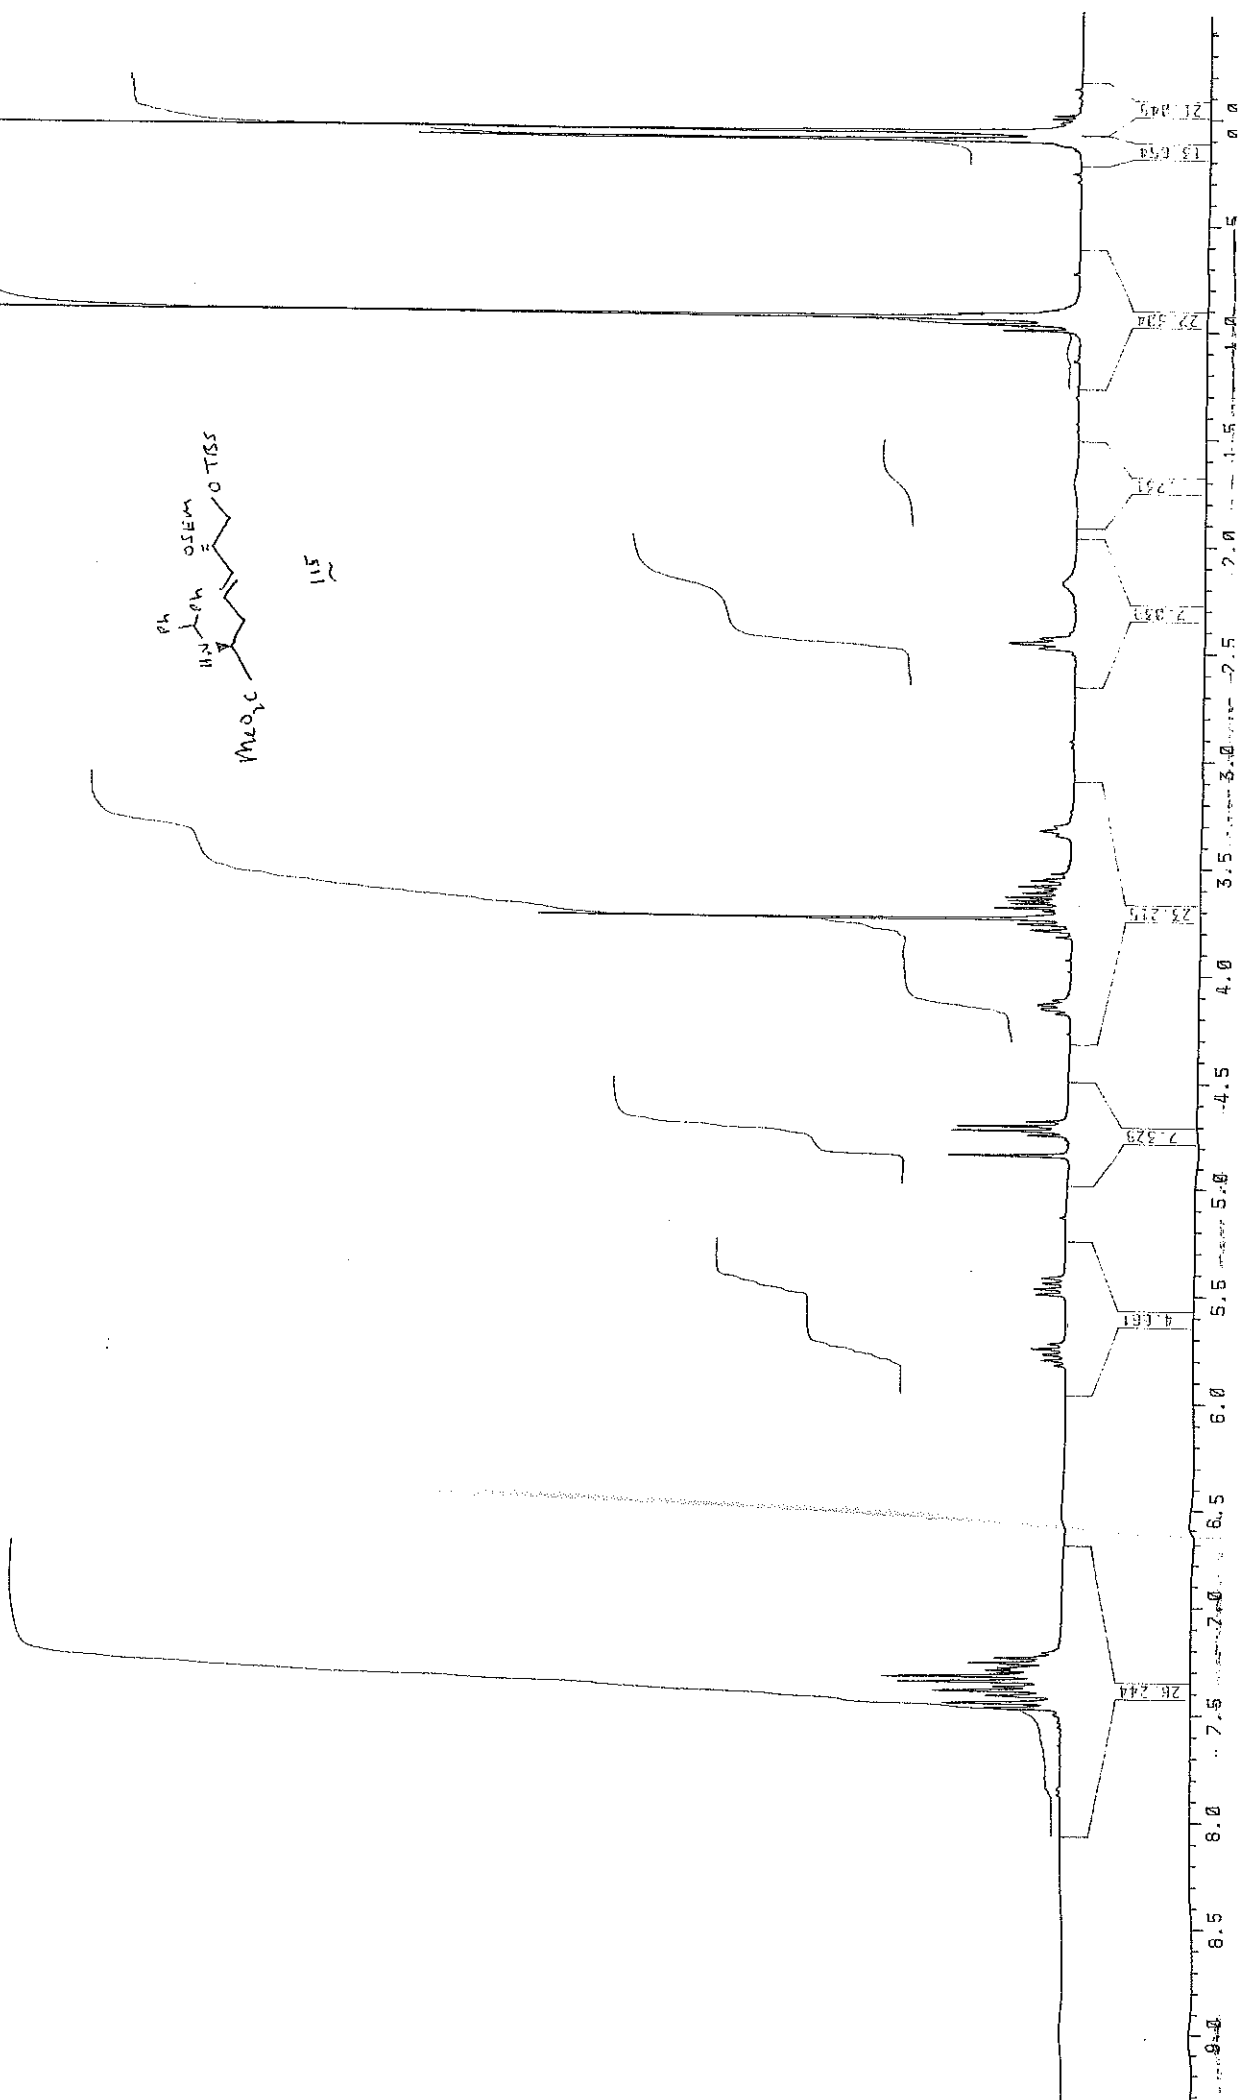

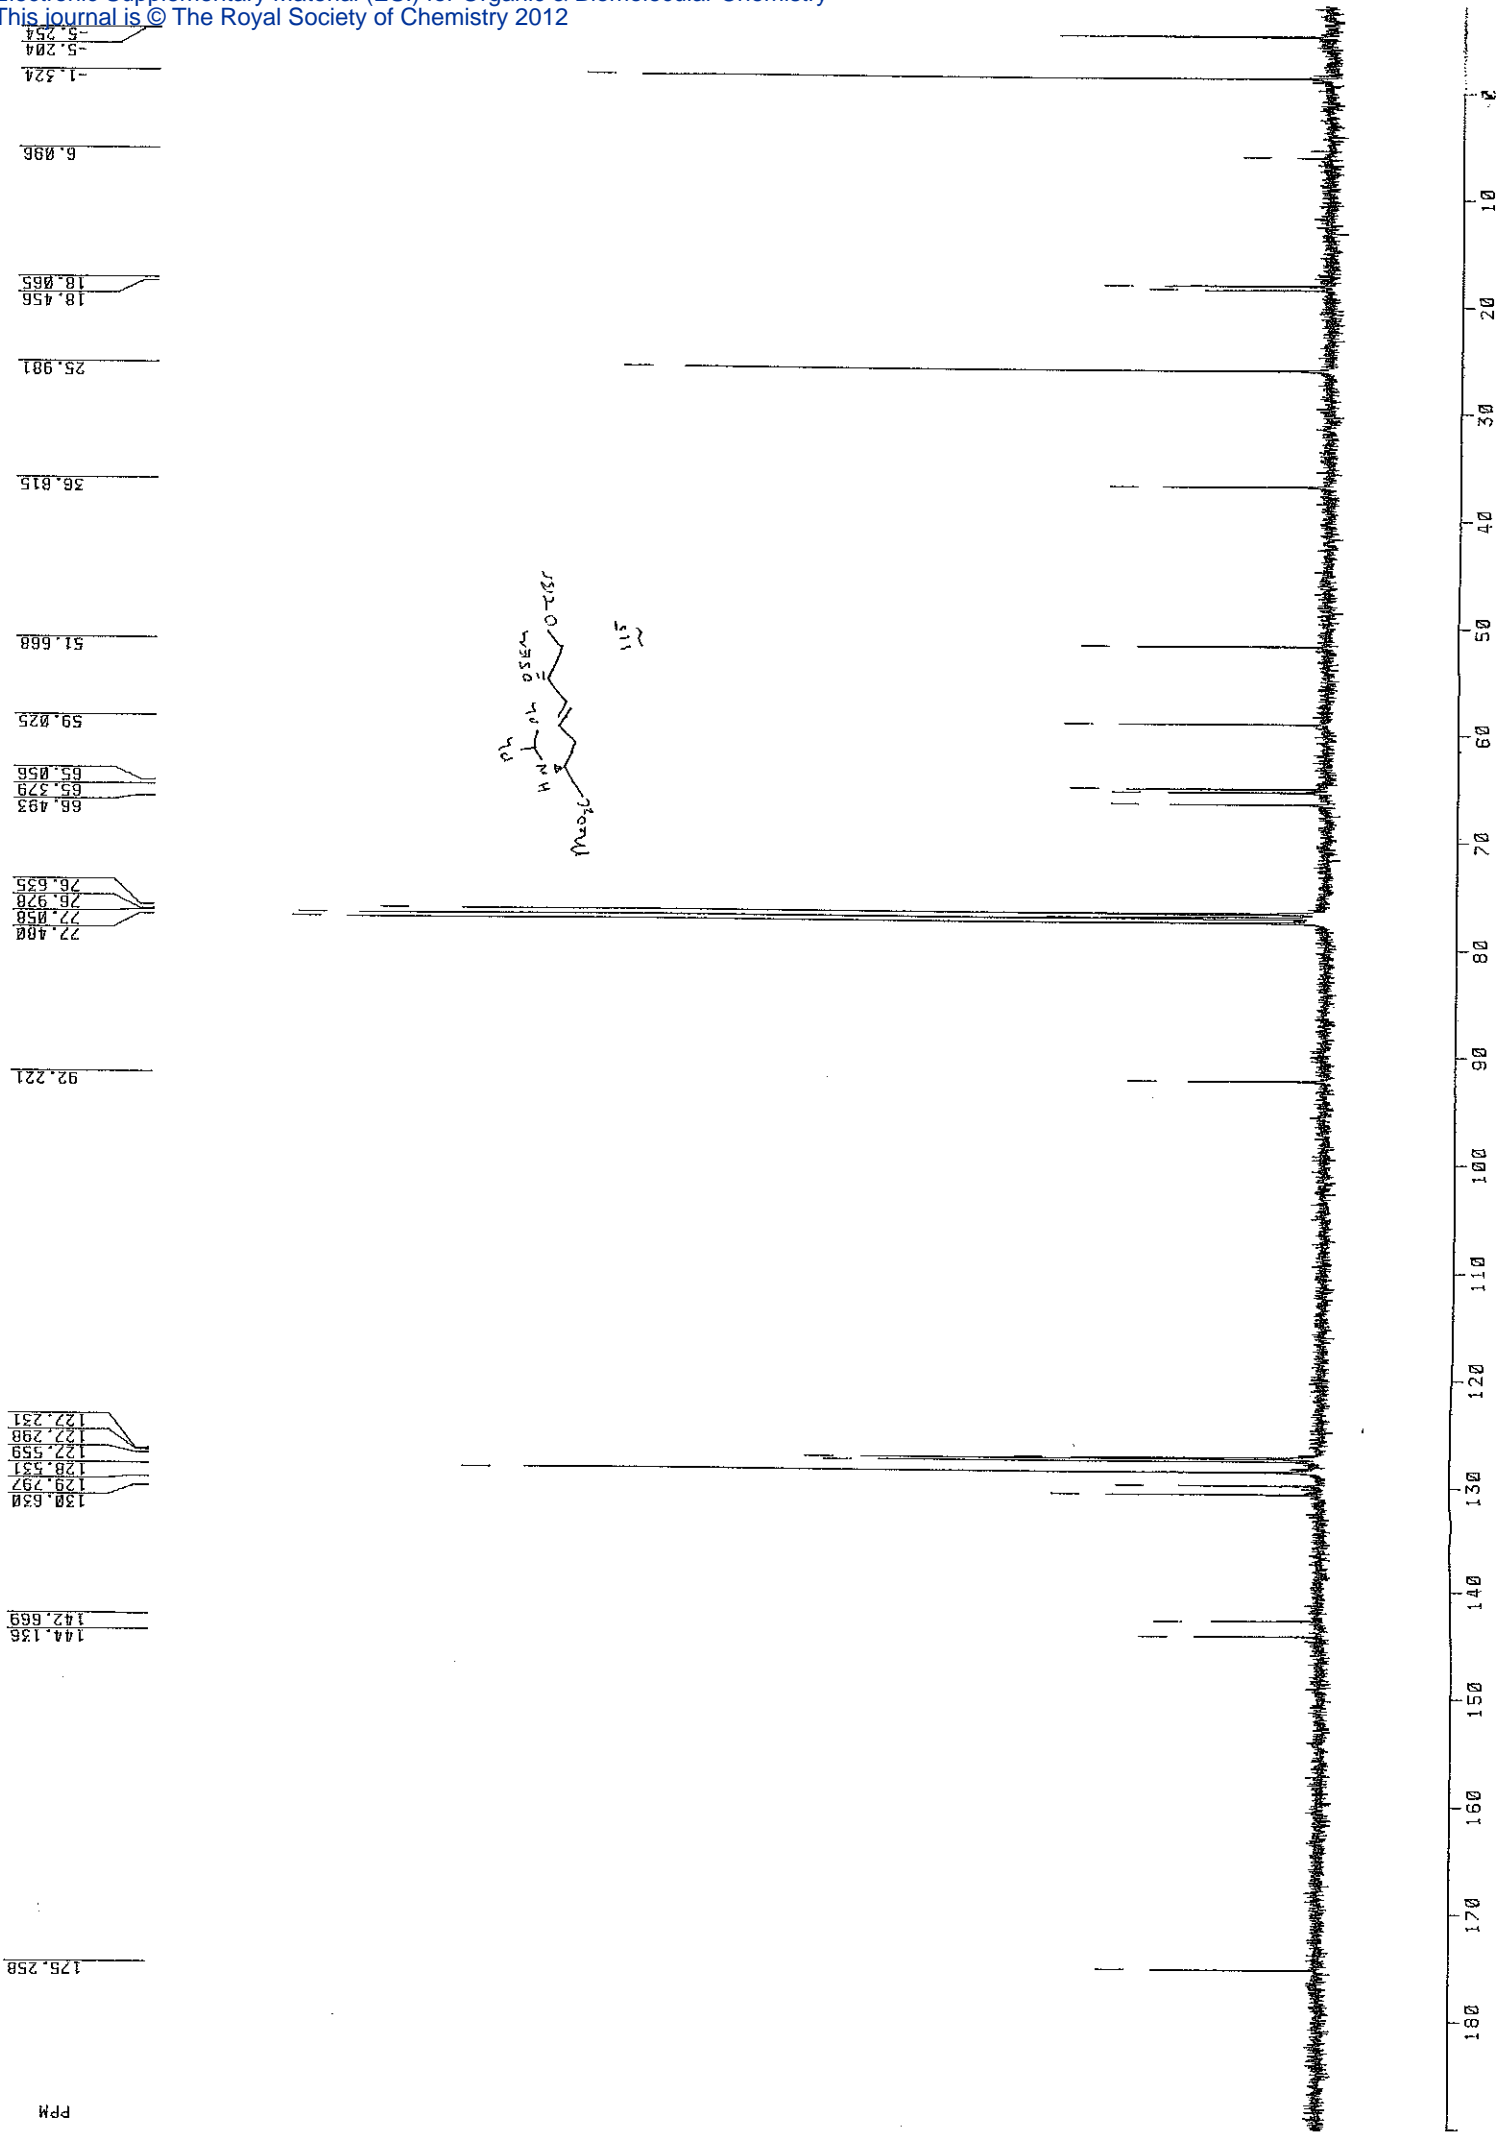

Supplement: c2ob25097g.pdf [file c2ob25097g.pdf]
